# Supplementary material for: Molybdenum(v)-mediated switching of the C(sp2)–Se bond of phenylselenyl-functionalized arenes or heterocycles under mild conditions
Source: Royal Society of Chemistry journal article supplement (doi:10.1039/d3cc01119d), 2023-01-01

## Supporting Information

# Molybdenum (V)-mediated switching of the C(sp<sup>2</sup>)-Se bond of phenylselenyl-functionalized arenes or heterocycles under mild conditions

Ming Zhang,<sup>†</sup> Beifang Nian,<sup>†</sup> Zhibang Wu, Jianhua Guo, Zhuo Chen, Caifeng Yuan,  
Xuankun Huang, Yiwen Shen, Hongbin Zhang,\* E Tang\*

Key Laboratory of Medicinal Chemistry for Natural Resource, Ministry of Education,  
Yunnan Provincial Center for Research & Development of Natural Products, School of  
Chemical Science and Technology, Yunnan University, Kunming 650091, China.

## Table of Contents

|                                                                                                        |     |
|--------------------------------------------------------------------------------------------------------|-----|
| <a href="#">1. General information</a> .....                                                           | S1  |
| <a href="#">2. Optimization of the reaction conditions</a> .....                                       | S1  |
| <a href="#">2.1 Optimization of the reaction conditions for the synthesis of compounds <b>c</b>...</a> | S1  |
| <a href="#">2.2 Optimization of the reaction conditions for the synthesis of compounds <b>e</b>...</a> | S3  |
| <a href="#">3. Synthesis of compounds <b>c</b></a> .....                                               | S4  |
| <a href="#">4. Synthesis of compounds <b>e</b></a> .....                                               | S4  |
| <a href="#">5. Control experiments</a> .....                                                           | S5  |
| <a href="#">6. Mechanistic investigations</a> .....                                                    | S11 |
| <a href="#">6.1 Mass spectrometry for intermediate <b>1b</b>...</a>                                    | S11 |
| <a href="#">6.2 Mass spectrometry for 1,1-dimethyl ethoxybenzene...</a>                                | S12 |
| <a href="#">6.3 Mass spectrometry for the chlorobenzene yielded from <b>1b</b>...</a>                  | S12 |
| <a href="#">6.4 Mass spectrometry for the chlorobenzene yielded from <b>1d</b>...</a>                  | S13 |
| <a href="#">6.5 Proposed mechanism for the formation of compound <b>29c</b>....</a>                    | S14 |
| <a href="#">7. X-ray structure of compounds <b>1b</b> and <b>8e</b>...</a>                             | S15 |

|                                                                     |     |
|---------------------------------------------------------------------|-----|
| <a href="#"><u>7.1 X-ray structure of compound <b>1b</b>...</u></a> | S15 |
| <a href="#"><u>7.2 X-ray structure of compound <b>8e</b>...</u></a> | S22 |
| <a href="#"><u>8. Characterization of products..</u></a>            | S26 |
| <a href="#"><u>9. References..</u></a>                              | S37 |
| <a href="#"><u>10. Copies of NMR spectra..</u></a>                  | S39 |

## 1. General information

Unless otherwise noted, all other reagents and starting materials were purchased from commercial source and used without further purification. Thin layer chromatography was carried out on GF<sub>254</sub> plates (0.25 mm layer thickness). Flash chromatography was performed with 200-300 mesh silica gels. Reactions were monitored by TLC and visualized by a dual short wave/long wave UV lamp. <sup>1</sup>H, <sup>13</sup>C and <sup>19</sup>F NMR spectra were recorded on Bruker Avance 400, 500, or 600 MHz spectrophotometers. Chemical shifts in <sup>1</sup>H NMR spectra were reported in parts per million (ppm) on the  $\delta$  scale. Data for <sup>1</sup>H NMR were reported as follows: chemical shift, multiplicity (s = singlet, d = doublet, t = triplet, q = quartet, m = multiplet or unresolved, br. s = broad singlet), coupling constant in Hertz (Hz) and integration. Data for <sup>13</sup>C NMR spectra were reported in terms of chemical shift in ppm. ESI-MS was taken on Agilent 1100 HPLC-TOF spectrometer. GC-MS was taken on FINNIgAN TRACEDSQ spectrometer.

**Substrates (1a-36a, 1d-12d) were prepared according to literature procedures.<sup>[1-8]</sup>**

## 2. Optimization of the reaction conditions

### 2.1 Optimization of the reaction conditions for the synthesis of compounds **c**

We selected 2-phenylseleno-1,1'-biphenyl (**1a**) as a test substrate with MoCl<sub>5</sub> as an oxidant and trimethylamine (TEA) as a base for this dephenylation and ring-closing reaction. To our delight, the desired dibenzoselenophene compound **1c** was obtained at room temperature with a yield of 12% (Table 1, entry 1). The reaction conditions were then optimized, and the results were summarized in Table 1. The yield of **1c** increased with the increase in the amount of MoCl<sub>5</sub> (entries 2-4). 47% was the best yield when 5.0 equiv. of MoCl<sub>5</sub> was used (entry 3). Solvent and base screening revealed that the reaction can proceed smoothly in the presence of ethylenediamine (EDA), NaH, and EtONa to obtain **1c** in 32-76% yields (entries 5-7), and the desired product was obtained when the reaction was carried out in DMSO, DMF, THF, EtOH,

CH<sub>3</sub>CN, toluene, ethyl acetate (EA), and diethyl ether (9-42%, entries 8-15), although the reaction yields were unsatisfactory. A significant improvement in the yield was observed when DCM and *t*-BuOK were employed as the reaction solvent and base, respectively, and **1c** was obtained in 92% yield (entry 16). The low solubility of MoCl<sub>5</sub> and *t*-BuOK in petroleum ether (PE) leads to a trace amount of the product (entry 17). The yield decreased significantly when the reaction time was shortened from 6 h to 3 h or less amount of *t*-BuOK was used (entries 18 and 22); the yield remained unchanged when the reaction time was extended or more base was employed (entries 19 and 24). Product **1c** was not observed in the absence of MoCl<sub>5</sub> or the base (entries 20 and 21). Only a 26% yield of **1c** was obtained when a mixture of 2.5 equiv. of MoCl<sub>5</sub> and 2.5 equiv. of TiCl<sub>4</sub> was used (entry 22).

**Table 1** Optimization of the dephenylation and ring-closing reaction condition of 2-phenylseleno-1,1'-biphenyl (**1a**)

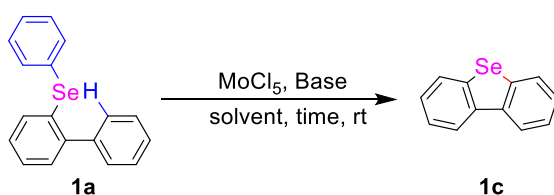

| Entry | MoCl <sub>5</sub> (equiv) | Solvent <sup>h</sup> | Base           | Yield of <b>1c</b> <sup>b</sup> (%) |
|-------|---------------------------|----------------------|----------------|-------------------------------------|
| 1     | 1.0                       | DCM                  | TEA            | 12                                  |
| 2     | 2.0                       | DCM                  | TEA            | 29                                  |
| 3     | 5.0                       | DCM                  | TEA            | 47                                  |
| 4     | 7.5                       | DCM                  | TEA            | 46                                  |
| 5     | 5.0                       | DCM                  | EDA            | 32                                  |
| 6     | 5.0                       | DCM                  | NaH            | 67                                  |
| 7     | 5.0                       | DCM                  | EtONa          | 76                                  |
| 8     | 5.0                       | DMSO                 | <i>t</i> -BuOK | 30                                  |
| 9     | 5.0                       | DMF                  | <i>t</i> -BuOK | 28                                  |
| 10    | 5.0                       | THF                  | <i>t</i> -BuOK | 22                                  |
| 11    | 5.0                       | EtOH                 | <i>t</i> -BuOK | 9                                   |
| 12    | 5.0                       | CH <sub>3</sub> CN   | <i>t</i> -BuOK | 15                                  |
| 13    | 5.0                       | Toluene              | <i>t</i> -BuOK | 42                                  |
| 14    | 5.0                       | EA                   | <i>t</i> -BuOK | 10                                  |
| 15    | 5.0                       | Et <sub>2</sub> O    | <i>t</i> -BuOK | 10                                  |

|                 |     |     |                |       |
|-----------------|-----|-----|----------------|-------|
| 16              | 5.0 | DCM | <i>t</i> -BuOK | 92    |
| 17              | 5.0 | PE  | <i>t</i> -BuOK | trace |
| 18 <sup>c</sup> | 5.0 | DCM | <i>t</i> -BuOK | 67    |
| 19 <sup>d</sup> | 5.0 | DCM | <i>t</i> -BuOK | 92    |
| 20              | –   | DCM | <i>t</i> -BuOK | nr    |
| 21              | 5.0 | DCM | –              | 0     |
| 22 <sup>e</sup> | 2.5 | DCM | <i>t</i> -BuOK | 26    |
| 23 <sup>f</sup> | 5.0 | DCM | <i>t</i> -BuOK | 69    |
| 24 <sup>g</sup> | 5.0 | DCM | <i>t</i> -BuOK | 92    |

<sup>a</sup>Reaction conditions: **1a** (0.2 mmol), MoCl<sub>5</sub>, base (5.0 equiv.), solvent (3 mL) in the air at room temperature for 6 h. <sup>b</sup>Isolated yield. <sup>c,d</sup>The reaction was performed for 3.0 h<sup>c</sup> and 7.5 h<sup>d</sup> respectively. <sup>e</sup>2.5 Equiv. of MoCl<sub>5</sub> and 2.5 equiv. of TiCl<sub>4</sub> were added.<sup>f,g</sup> 4.0<sup>f</sup> And 6.0<sup>g</sup> equiv. of *t*-BuOK were added. <sup>h</sup>EA, PE, TEA, and EDA are ethyl acetate, petroleum ether, triethylamine, and ethylenediamine, respectively.

## 2.2 Optimization of the reaction conditions for the synthesis of compounds e

We selected 3-phenylselenanyl flavone (**1d**) as a test substrate with MoCl<sub>5</sub> (5.0 equiv.) and *t*-BuOK (5.0 equiv.) for this dephenylation and ring-closing reaction. The desired product 5a,10a-dihydro-11*H*-benzo[4,5]selenopheno[3,2-*b*]chromen-11-one (**1e**) was obtained at room temperature with a yield of 20% (Table 2, entry 1). A better yield of 57% was obtained when the amounts of MoCl<sub>5</sub> and *t*-BuOK were increased to 10.0 equiv. Then, we screened the following bases, including NaH, EtONa, EDA, and TEA, to obtain **1e** in 32-71% yields (Table 2, entries 3-6). TEA is a better base than *t*-BuOK for the reaction of **1d** (Table 2, entry 3). Neither increasing nor decreasing the amounts of TEA and MoCl<sub>5</sub> resulted in a higher yield of **1e** (entries 7-11).

**Table 2** Optimization of the dephenylation and ring-closing reaction conditions of 3-phenylselenanyl flavone (**1d**)

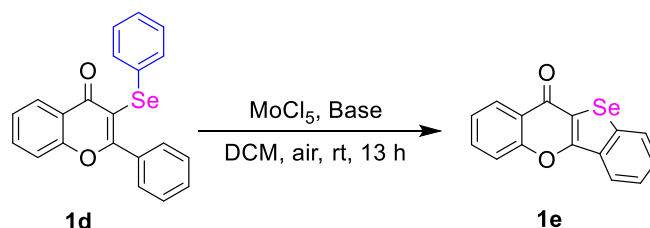

| Entry | MoCl <sub>5</sub> (equiv) | Base           | Yield of <b>1e</b> <sup>b</sup> (%) |
|-------|---------------------------|----------------|-------------------------------------|
| 1     | 5.0                       | <i>t</i> -BuOK | 20                                  |
| 2     | 10                        | <i>t</i> -BuOK | 57                                  |
| 3     | 10                        | TEA            | 71                                  |
| 4     | 10                        | NaH            | 32                                  |
| 5     | 10                        | EtONa          | 45                                  |
| 6     | 10                        | EDA            | 62                                  |
| 7     | 1.0                       | TEA            | 6                                   |
| 8     | 2.0                       | TEA            | 18                                  |
| 9     | 5.0                       | TEA            | 48                                  |
| 10    | 7.5                       | TEA            | 65                                  |
| 11    | 12                        | TEA            | 70                                  |

<sup>a</sup>Reaction conditions: **1d** (0.2 mmol), DCM (3 mL) in the air at room temperature for 13 h, using the same equivalent of base and MoCl<sub>5</sub>. <sup>b</sup>Isolated yield.

### 3. Synthesis of compounds **c**

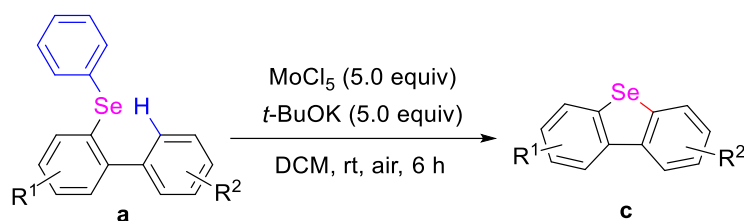

To a reaction tube containing **a** (0.2 mmol) of DCM (3.0 mL) was added MoCl<sub>5</sub> (1.0 mmol, 27.3 mg). Stir at room temperature for 5 hours. Monitor the progress of the reaction by TLC. After the reaction is complete, add *t*-BuOK (1.0 mmol, 112 mg) and continue stirring for 1 h. Filter the reaction solution through a short pad of silica gel quickly. Dried over MgSO<sub>4</sub>, filtered, and concentrated under reduced pressure. The residue was purified by column chromatography (petroleum ether/ethyl acetate = 500/1, V/V) to afford compounds **c**.

### 4. Synthesis of compounds **e**

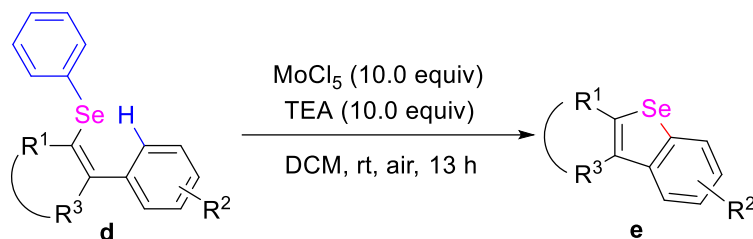

To a reaction tube containing **d** (0.2 mmol) in DCM (3.0 mL) was added MoCl<sub>5</sub> (2.0 mmol, 54.6 mg). Stir at room temperature for 5 hours. Monitor the progress of the reaction by TLC. After the reaction is complete, add TEA (2.0 mmol, 0.28 mL) and continue stirring for 1 h. Quickly filter the reaction solution through a short pad of silica gel. Dried over MgSO<sub>4</sub>, filtered, and concentrated under reduced pressure. The residue was purified by column chromatography (petroleum ether/ethyl acetate = 10/1, V/V) to afford the compound **e**.

## 5. Control experiments

In order to clarify the mechanism of Mo-mediated dephenylation and intramolecular oxidative C(sp<sup>2</sup>)-Se coupling reaction of phenyl selenides, we performed some control experiments (Scheme 1). In the absence of the base, substrate **1a** reacted with 5.0 equiv. of MoCl<sub>5</sub> at room temperature in the air for 5 h. A selenonium cation (**1b**) was observed by HRMS and isolated quantitatively by HPLC, and the major product **1b** was the [MoOCl<sub>4</sub>]<sup>-</sup> anion with an associated selenonium cation [Scheme 1, (1)], whose structure was confirmed as [PhSeAr<sub>2</sub>]<sup>+</sup>[MoOCl<sub>4</sub>(H<sub>2</sub>O)]<sup>-</sup> by the X-ray crystallographic analysis of pale green crystals grown from **1b** (Manuscript, Scheme 4), and no doubt the result of ingress of adventitious water during crystallization. The water O is trans to Mo=O. A similar structure of this anion has been reported previously.<sup>14</sup> If **1b** was treated with 5 equiv. of *t*-BuOK, product **1c** would yield a 94% yield. Phenyl *tert*-butyl ether and chlorobenzene, as key by-products, were observed by HRMS analysis and isolated by HPLC in 74% and 6% yields, respectively [Scheme 1, (2)]. Chlorobenzene was also obtained by HPLC with a yield of 16% in the reaction of **1d** [Scheme 1, (3)]. The three experiments indicated that the product-forming step of this reaction lies in a Mo-mediated oxidative coupling of selenide and a subsequent SN

**Scheme 1. Control experiments<sup>a,b</sup>**

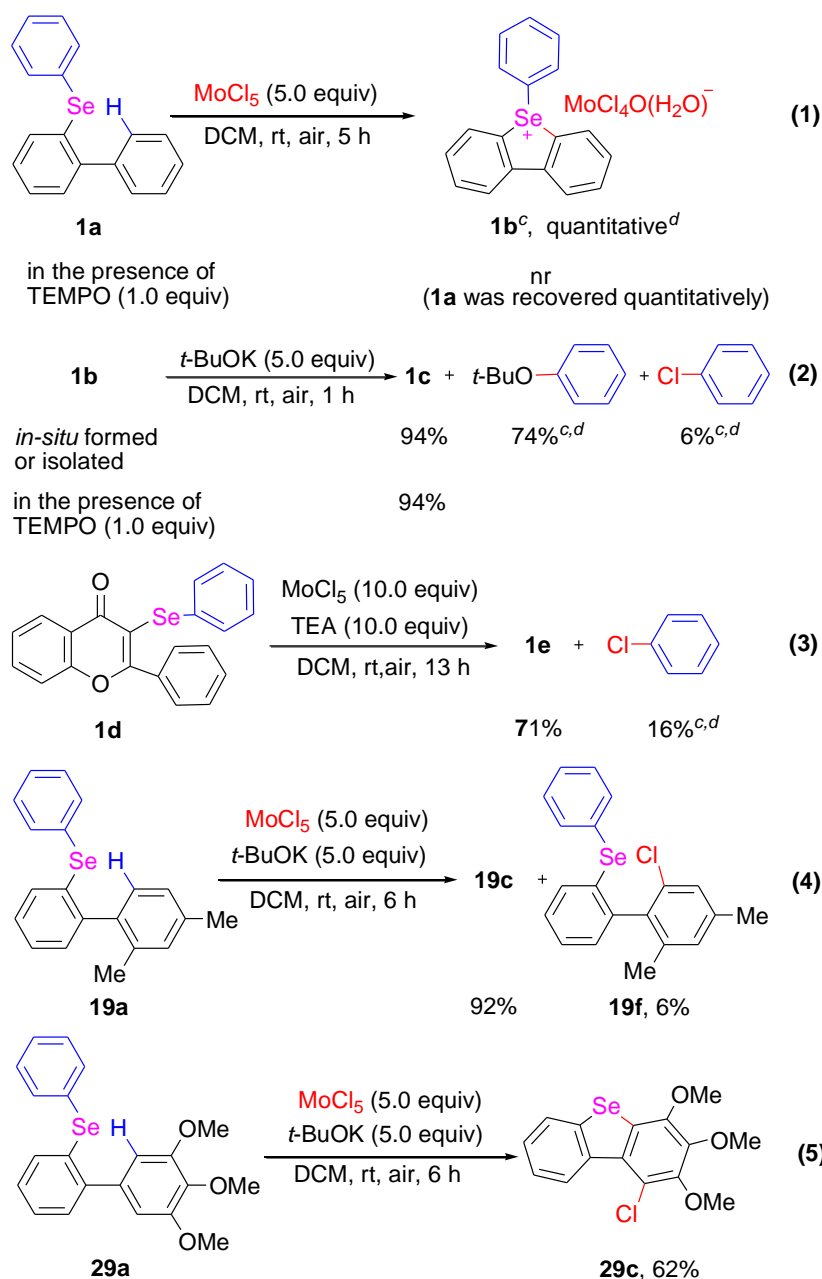

<sup>a</sup>Reaction conditions: **a** (0.2 mmol), MoCl<sub>5</sub> (5.0 equiv.), *t*-BuOK (5.0 equiv.), DCM (3 mL), and at room temperature. <sup>b</sup>Isolated yield. <sup>c</sup>Detected by HRMS <sup>d</sup> Isolated by HPLC [acetonitrile: H<sub>2</sub>O (vol./vol) = 90 : 10, 1.5 mL/min, monitoring at 254 nm by UV spectroscopy].

substitution reaction. This process can also be verified from the reaction in which the by-product **19f** was obtained with a yield of 6%. This is the result of a chlorine anion attacking intermediate **19b** as a nucleophile to lead to the cleavage of the C(sp<sup>2</sup>)-Se bond [Scheme 1, (4)]. When using a substrate bearing multiple strong electron-donating



groups on the benzene ring, the chloro-functionalized dibenzo[*b,d*]selenonene **29c** was obtained in 62% yield by two attacks of Cl<sup>-</sup> ions to the selenonium intermediate [Scheme 1, (5)]. Furthermore, 1.0 equiv. of 2,2,6,6-tetramethylpiperidinoxy (TEMPO) shut down the reaction of **1a** but not of **1b**, implying that only the formation of **1b** from **1a** proceeds *via* the radical pathway [Scheme 1, (1) and (2)].

### 5.1 Reaction of **1a** with MoCl<sub>5</sub> [Scheme 1, (1)]

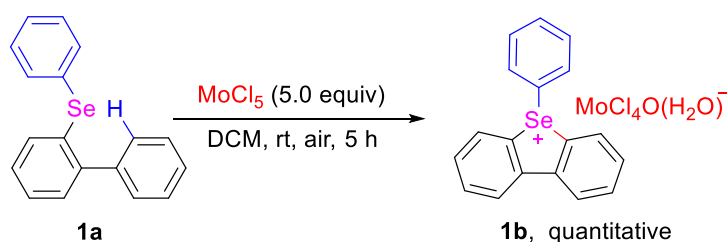

To a reaction tube containing **1a** (0.2 mmol, 61.9 mg) in DCM (3.0 mL) was added MoCl<sub>5</sub> (1.0 mmol, 27.3 mg). Stir at room temperature for 5 hours. Monitor the progress of the reaction by TLC. After substrate **1a** is completely transformed, filter the mixture. Compound **1b** was obtained quantitatively, and it can be further purified by recrystallization of petroleum ether and dichloromethane.

### 5.2 Reaction of **1b** with *t*-BuOK [Scheme 1, (2)]

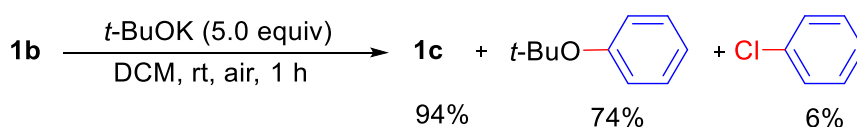

Dissolve **1b** (1.0 mmol, 580.0 mg) in DCM (5.0 mL), add *t*-BuOK (5.0 mmol, 560 mg) and stirring at room temperature for 1 h. Filter the reaction solution through a short pad of silica gel quickly. Dried over MgSO<sub>4</sub>, filtered, and concentrated under reduced pressure. The mixture was purified on an Agilent HPLC 1260 system using acetonitrile: H<sub>2</sub>O (90:10 vol./vol.) as mobile phase and flow rate of 1.5 mL/min with monitoring at 254 nm to give chlorobenzene and 1,1-dimethylethoxybenzene in 6% and 74% yields, respectively.

### 5.3 Reaction of **1d** with MoCl<sub>5</sub> [Scheme 1, (3)]

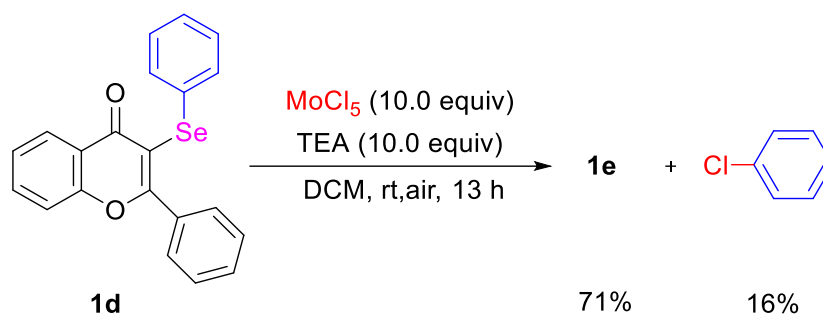

To a reaction tube containing **1d** (0.5 mmol, 188.6 mg) in DCM (3.0 mL) was added MoCl<sub>5</sub> (5.0 mmol, 54.6 mg). Stir at room temperature for 5 h. Monitor the progress of the reaction by TLC. After the reaction is complete, add TEA (5.0 mmol, 0.28 mL) and continue stirring for 1 h. Filter the reaction solution through a short pad of silica gel quickly. Dried over MgSO<sub>4</sub>, filtered, and concentrated under reduced pressure. The mixture was purified on an Agilent HPLC 1260 system using acetonitrile:H<sub>2</sub>O (90:10 vol./vol.) as mobile phase and flow rate of 1.5 mL/min with monitoring at 254 nm to give chlorobenzene in 16% yield.

### 5.4 Reaction of **19a** with MoCl<sub>5</sub> [Scheme 1, (4)]

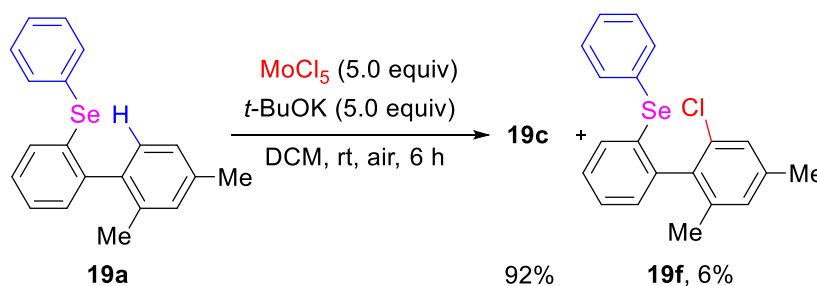

To a reaction tube containing **19a** (0.2 mmol, 67.5 mg) in DCM (3.0 mL) was added MoCl<sub>5</sub> (1.0 mmol, 27.3 mg). Stir at room temperature for 5 h. Monitor the progress of the reaction by TLC. After the reaction is complete, add *t*-BuOK (1.0 mmol, 112 mg) and continue stirring for 1 h. Filter the reaction solution through a short pad of silica gel quickly. Dried over MgSO<sub>4</sub>, filtered, and concentrated under reduced pressure. The residue was purified by column chromatography (petroleum ether/ethyl acetate = 600/1, V/V) to afford compound **19c** and **19f** in 92% and 6% yields, respectively.

### 5.5 Reaction of **29a** with MoCl<sub>5</sub> [Scheme 1, (5)]

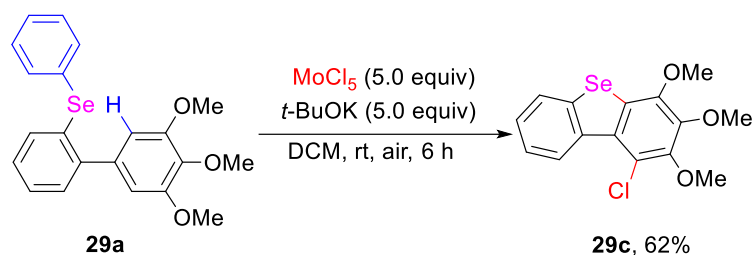

To a reaction tube containing **29a** (0.2 mmol, 79.9 mg) in DCM (3.0 mL) was added  $\text{MoCl}_5$  (1.0 mmol, 27.3 mg). Stir at room temperature for 5 h. Monitor the progress of the reaction by TLC. After the reaction is complete, add *t*-BuOK (1.0 mmol, 112 mg) and continue stirring for 1 h. Filter the reaction solution through a short pad of silica gel quickly. Dried over  $\text{MgSO}_4$ , filtered, and concentrated under reduced pressure. The residue was purified by column chromatography (petroleum ether/ethyl acetate = 300/1, V/V) to afford compound **29c** in 62% yield.

### 5.6 Reaction of **1a** with $\text{MoCl}_5$ and TEMPO [Scheme 1, (6)]

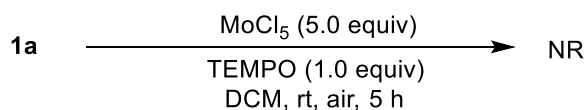

To a reaction tube containing **1a** (0.2 mmol, 61.9 mg) in DCM (3.0 mL) was added  $\text{MoCl}_5$  (1.0 mmol, 27.3 mg) and TEMPO (0.2 mmol, 31.3 mg). Stir at room temperature for 5 h. Monitor the progress of the reaction by TLC. The substrate **1a** has not been consumed, and no new products have appeared. Quickly filter the reaction solution through a short pad of silica gel. Dried over  $\text{MgSO}_4$ , filtered, and concentrated under reduced pressure. The residue was purified by column chromatography (petroleum ether/ethyl acetate = 500/1, V/V) to afford **1a** quantitatively.

### 5.7 Reaction of **1b** with $\text{MoCl}_5$ and TEMPO [Scheme 1, (7)]

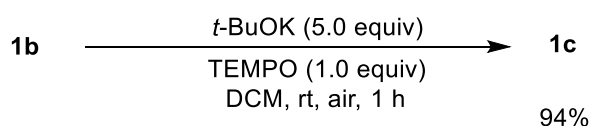

Dissolve **1b** (0.2 mmol, 116.0 mg) in DCM (2.0 mL), add TEMPO (0.2 mmol, 31.3 mg) and *t*-BuOK (1.0 mmol, 112 mg) and stirring at room temperature for 1 h.

Monitor the progress of the reaction by TLC. After the reaction is complete, quickly filter the reaction solution through a short pad of silica gel. Dried over MgSO<sub>4</sub>, filtered, and concentrated under reduced pressure. The residue was purified by column chromatography (petroleum ether/ethyl acetate = 500/1, V/V) to afford compound **1c** in 94% yield.

### 5.8 Reaction of **1a** under an argon atmosphere

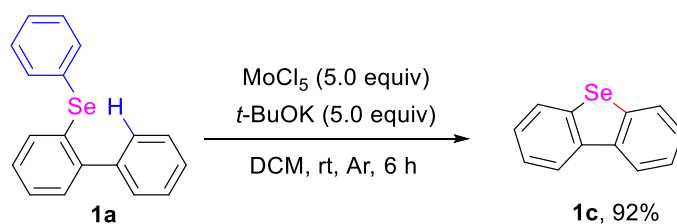

**1a** (0.2 mmol, 61.9 mg) and MoCl<sub>5</sub> (1.0 mmol, 27.3 mg) were added to a two-necked flask under an argon atmosphere. Then DCM (3 mL) was injected into the bottle. Stir at room temperature for 5 h. Monitor the progress of the reaction by TLC. After the reaction is complete, add dissolved *t*-BuOK (1.0 mmol, 112 mg) and continue stirring for 1 h. Quickly filter the reaction solution through a short pad of silica gel. Dried over MgSO<sub>4</sub>, filtered, and concentrated under reduced pressure. The residue was purified by column chromatography (petroleum ether/ethyl acetate = 500/1, V/V) to afford compound **1c**.

### 5.8 Reaction of **1a** under an oxygen atmosphere

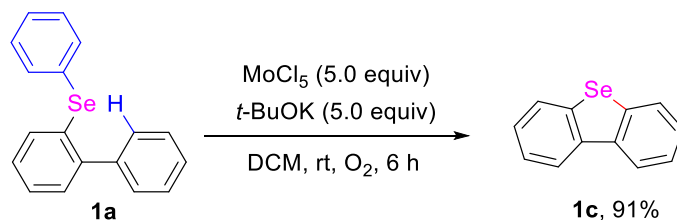

**1a** (0.2 mmol, 61.9 mg) and MoCl<sub>5</sub> (1.0 mmol, 27.3 mg) were added to a two-necked flask under an oxygen atmosphere. Then DCM (3 mL) was injected into the bottle. Stir at room temperature for 5 h. Monitor the progress of the reaction by TLC. After the reaction is complete, add dissolved *t*-BuOK (1.0 mmol, 112 mg) and continue stirring for 1 h. Quickly filter the reaction solution through a short pad of silica gel.

Dried over  $\text{MgSO}_4$ , filtered, and concentrated under reduced pressure. The residue was purified by column chromatography (petroleum ether/ethyl acetate = 500/1, V/V) to afford compound **1c**.

## 6. Mechanistic investigations

### 6.1 Mass spectrometry for intermediate **1b**

To a reaction tube containing **1a** (0.2 mmol, 61.9 mg) in DCM (3.0 mL) was added  $\text{MoCl}_5$  (1.0 mmol, 27.3 mg). Stir at room temperature for 5 h. Monitor the progress of the reaction by TLC. After the reaction is complete, product **1b** can be detected by ESI. HR-ESI-MS ( $m/z$ ): calcd. for  $\text{C}_{18}\text{H}_{13}\text{Se}^+$   $[\text{M}+\text{H}]^+$  309.0177, found 309.0171.

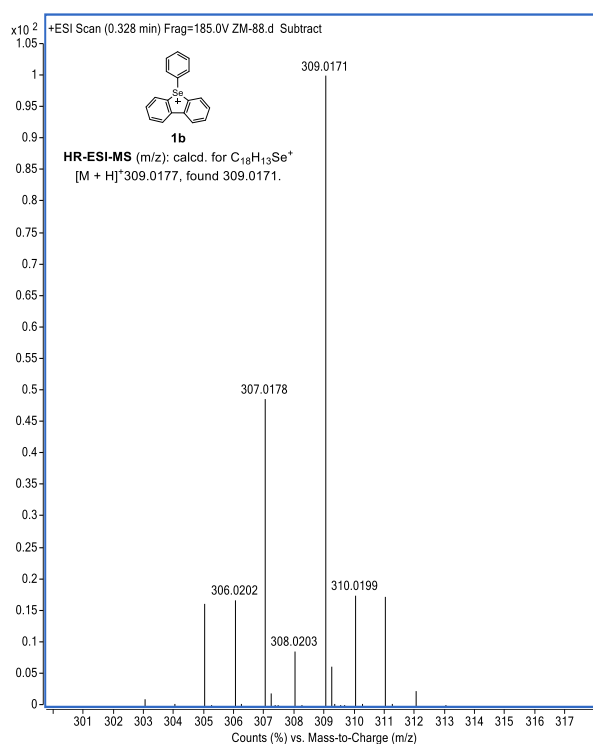

**Figure S1.** Mass spectrum of **1b**.

### 6.2 Mass spectrometry for 1,1-dimethylethoxybenzene.

To a reaction tube containing **1a** (0.2 mmol) in DCM (3.0 mL) was added  $\text{MoCl}_5$  (1.0 mmol, 27.3 mg). Stir at room temperature for 5 h. Monitor the progress of the

reaction by TLC. After the reaction is complete, add *t*-BuOK (1.0 mmol, 112 mg) and continue stirring for 1 h. After the reaction is complete, quickly filter the reaction solution through a short pad of silica gel. Dried over MgSO<sub>4</sub>, filtered, and concentrated under reduced pressure. 1,1-Dimethylethoxybenzene can be detected by ESI. HR-ESI-MS (m/z): calcd. for C<sub>10</sub>H<sub>14</sub>O [M+H]<sup>+</sup> 151.1117, found 151.1114.

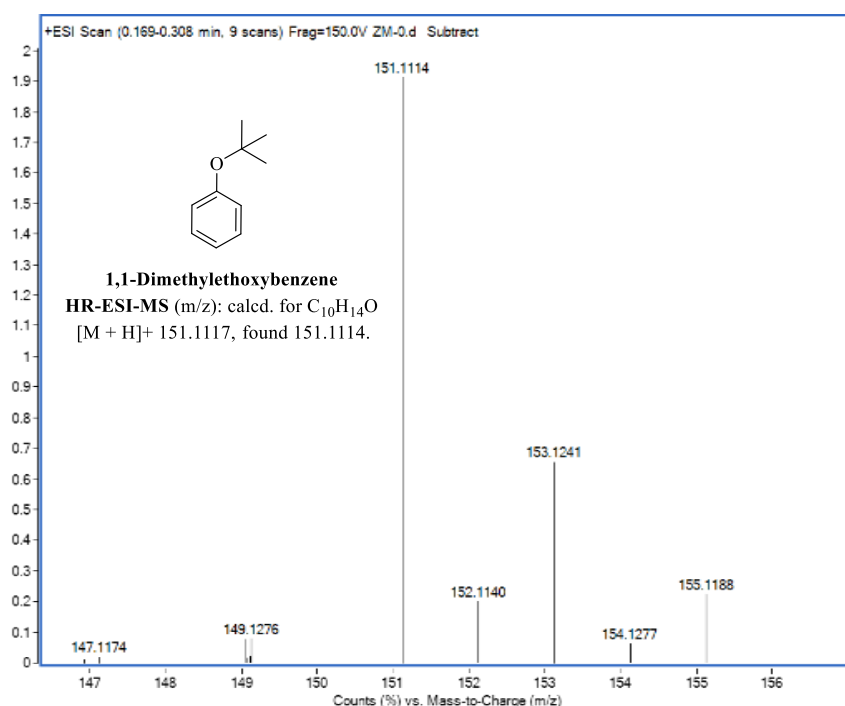

**Figure S2.** Mass spectrum of 1,1-dimethylethoxybenzene.

### 6.3 Mass spectrometry for the chlorobenzene yielded from **1b**

To a reaction tube containing **1b** (0.2 mmol, 116 mg) in DCM (2.0 mL) was added *t*-BuOK (1.0 mmol, 112 mg) and stirring for 1 h. After the reaction is complete, quickly filter the reaction solution through a short pad of silica gel. Dried over MgSO<sub>4</sub>, filtered, and concentrated under reduced pressure. Chlorobenzene can be detected by EI. GC-MS (EI): calcd. for C<sub>6</sub>H<sub>5</sub>Cl [M<sup>+</sup>] 112; found 112.

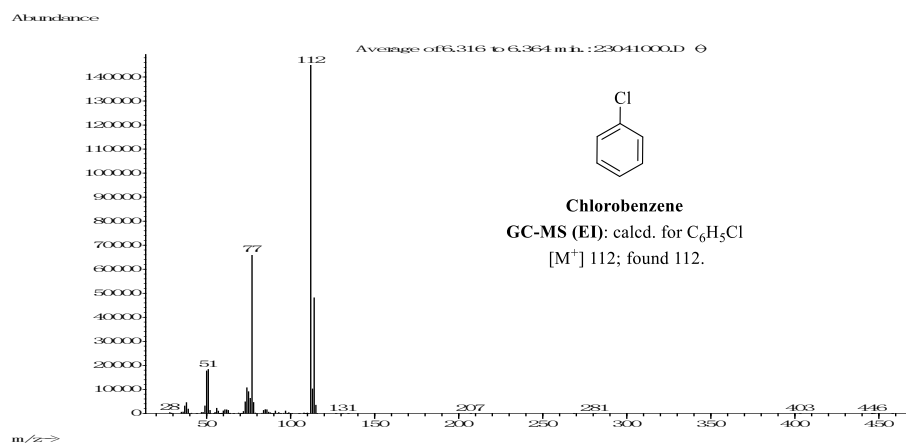

**Figure S3.** Mass spectrum of chlorobenzene yielded from **1b**

#### 6.4 Mass spectrometry for the chlorobenzene yielded from **1d**

To a reaction tube containing **1d** (0.2 mmol, 75.4 mg) in DCM (3.0 mL) was added MoCl<sub>5</sub> (2.0 mmol, 54.6 mg). Stir at room temperature for 5 h. Monitor the progress of the reaction by TLC. After the reaction is complete, add TEA (2.0 mmol, 0.28 mL) and continue stirring for 1 h. Quickly filter the reaction solution through a short pad of silica gel. Dried over MgSO<sub>4</sub>, filtered, and concentrated under reduced pressure. Chlorobenzene can be detected by EI. GC-MS (EI): calcd. for C<sub>6</sub>H<sub>5</sub>Cl [M<sup>+</sup>] 112; found 112.

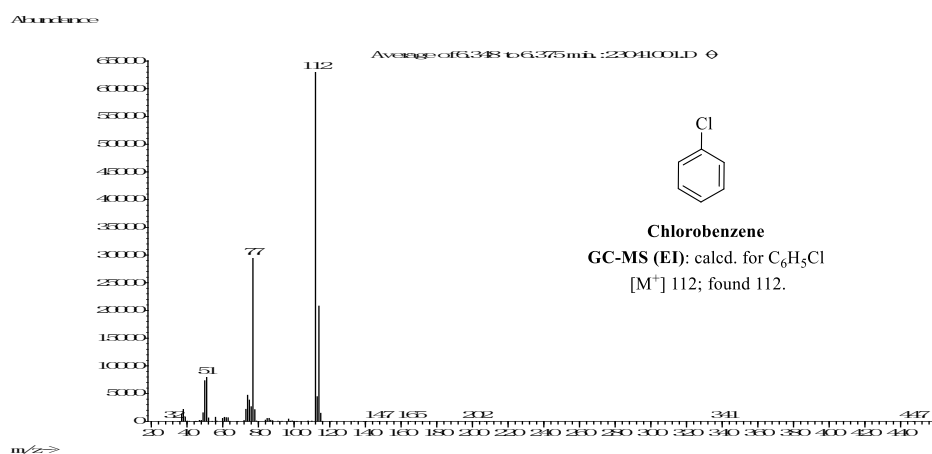

**Figure S4.** Mass spectrum of chlorobenzene from yielded from **1d**

#### 6.5 Proposed mechanism for the formation of compound **29c**.

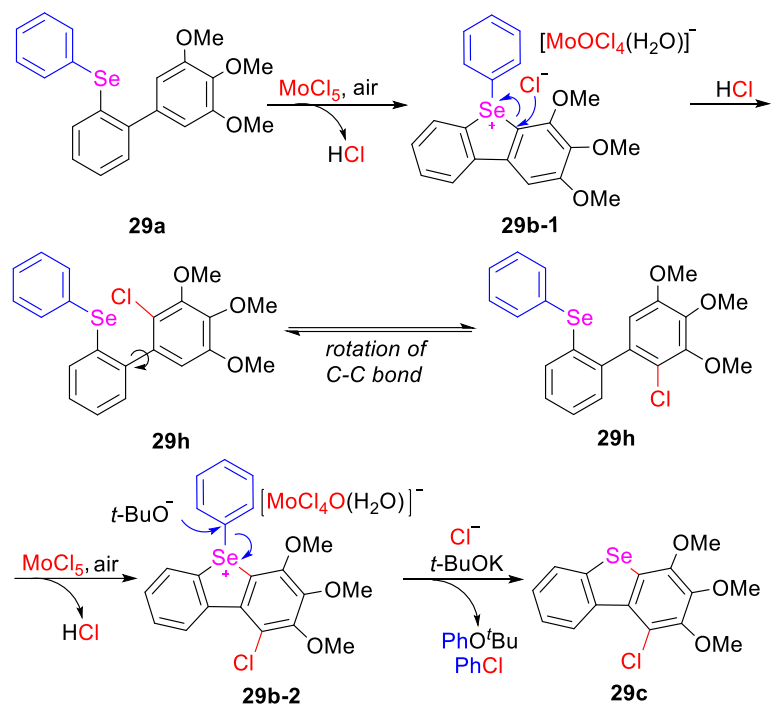

Compound **29a** was initially catalyzed by  $\text{MoCl}_5$  to form intermediate **29b-1**. **29b-1** was attacked by the chloride anion to form compound **29h**. After the rotation of the C-C bond, the conformer formed by **29h** favors the formation of intermediate **29b-2**. The addition of  $t\text{-BuOK}$  leads to the selective cleavage of  $\text{C}(\text{sp}^2)\text{-Se}$  bond, compound **29c** was finally formed *via* dephenylation reaction.



## 7. X-ray structure of compounds 1b and 8e.

### 7.1 X-ray structure of compound 1b.

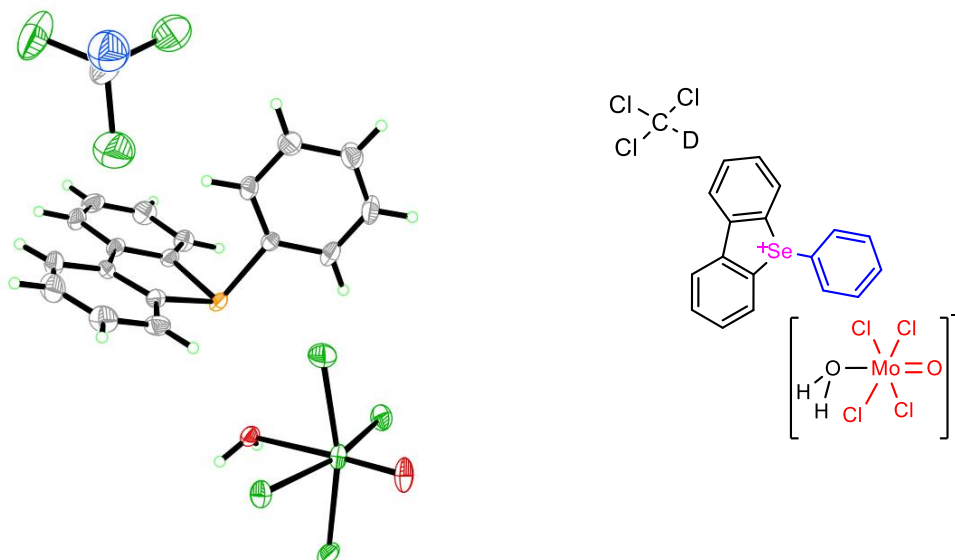

**Table 1.** Crystal Data and Structure Refinement for **1b**.

|                                 |                                                                                                                      |
|---------------------------------|----------------------------------------------------------------------------------------------------------------------|
| Identification code             | <b>1b</b>                                                                                                            |
| Empirical formula               | C <sub>19</sub> H <sub>15</sub> DC <sub>17</sub> MoO <sub>2</sub> Se                                                 |
| Formula weight                  | 700.37                                                                                                               |
| Temperature                     | 150.00 K                                                                                                             |
| Wavelength                      | 0.71073 Å                                                                                                            |
| Crystal system, space group     | Triclinic, P-1                                                                                                       |
| Unit cell dimensions            | a = 8.2075(12) Å    α = 103.403(5)°.<br>b = 12.1341(16) Å    β = 90.813(6)°.<br>c = 13.2766(19) Å    γ = 98.443(5)°. |
| Volume                          | 1270.7(3) Å <sup>3</sup>                                                                                             |
| Z, Calculated density           | 2, 1.831 Mg/m <sup>3</sup>                                                                                           |
| Absorption coefficient          | 2.699 mm <sup>-1</sup>                                                                                               |
| F(000)                          | 682                                                                                                                  |
| Crystal size                    | 0.18 × 0.15 × 0.1 mm                                                                                                 |
| Theta range for data collection | 2.059 to 25.000°.                                                                                                    |
| Limiting indices                | -9 ≤ h ≤ 9, -14 ≤ k ≤ 14, -15 ≤ l ≤ 15                                                                               |
| Reflections collected / unique  | 15684 / 4475 [R(int) = 0.0607]                                                                                       |
| Completeness to theta = 25.000  | 99.9 %                                                                                                               |
| Absorption correction           | Semi-empirical from equivalents                                                                                      |
| Max. and min. transmission      | 0.7457 and 0.5719                                                                                                    |
| Refinement method               | Full-matrix least-squares on F <sup>2</sup>                                                                          |

|                                    |                                     |
|------------------------------------|-------------------------------------|
| Data/restraints/parameters         | 4475 / 48 / 272                     |
| Goodness-of-fit on F <sup>2</sup>  | 0.984                               |
| Final R indices [I>2 $\alpha$ (I)] | R1 = 0.0572, wR2 = 0.1433           |
| R indices (all data)               | R1 = 0.0792, wR2 = 0.1569           |
| Extinction coefficient             | n/a                                 |
| Largest diff. peak and hole        | 1.715 and -1.560 e. Å <sup>-3</sup> |

**Table 2.** Atomic coordinates ( $\times 10^4$ ) and equivalent isotropic displacement parameters ( $\text{Å}^2 \times 10^3$ ) for **1b**.

U(eq) is defined as one-third of the trace of the orthogonalized U<sub>ij</sub> tensor.

|       | x        | y        | z       | U(eq)  |
|-------|----------|----------|---------|--------|
| Mo(1) | 8312(1)  | 11590(1) | 1528(1) | 38(1)  |
| Cl(1) | 7599(3)  | 10891(2) | 2945(2) | 60(1)  |
| O(2)  | 7856(6)  | 9633(4)  | 672(4)  | 35(1)  |
| Cl(3) | 5483(2)  | 11387(2) | 1030(2) | 49(1)  |
| Cl(4) | 8957(2)  | 11768(2) | -198(2) | 45(1)  |
| Cl(5) | 11013(2) | 11180(2) | 1737(1) | 42(1)  |
| O(1)  | 8657(7)  | 12974(4) | 2087(5) | 58(2)  |
| Se(1) | 5099(1)  | 7730(1)  | 1454(1) | 32(1)  |
| C(1)  | 4197(8)  | 8414(5)  | 2738(5) | 30(1)  |
| C(2)  | 4165(8)  | 7914(6)  | 3569(6) | 40(2)  |
| C(3)  | 3469(10) | 8437(7)  | 4467(6) | 51(2)  |
| C(4)  | 2863(11) | 9465(7)  | 4508(6) | 55(2)  |
| C(5)  | 2906(11) | 9932(7)  | 3676(7) | 56(2)  |
| C(6)  | 3573(9)  | 9423(6)  | 2761(6) | 45(2)  |
| C(7)  | 4021(8)  | 6165(5)  | 1223(5) | 34(2)  |
| C(8)  | 2444(9)  | 5769(6)  | 840(6)  | 42(2)  |
| C(9)  | 1892(11) | 4592(7)  | 696(7)  | 54(2)  |
| C(10) | 2936(11) | 3885(7)  | 924(6)  | 52(2)  |
| C(11) | 4516(11) | 4298(6)  | 1311(6) | 46(2)  |
| C(12) | 5094(9)  | 5465(5)  | 1477(5) | 34(2)  |
| C(13) | 6729(9)  | 6065(6)  | 1896(5) | 36(2)  |
| C(14) | 8016(10) | 5580(7)  | 2239(6) | 51(2)  |
| C(15) | 9462(10) | 6292(9)  | 2640(7) | 62(2)  |
| C(16) | 9703(9)  | 7458(8)  | 2702(7) | 56(2)  |
| C(17) | 8437(9)  | 7947(7)  | 2346(6) | 45(2)  |
| C(18) | 6976(8)  | 7237(6)  | 1976(5) | 34(2)  |
| Cl(6) | 8102(7)  | 6955(4)  | 5106(3) | 142(2) |
| Cl(7) | 5389(6)  | 6834(4)  | 6342(3) | 126(1) |
| Cl(8) | 7274(6)  | 5011(3)  | 6027(3) | 137(2) |
| C(19) | 7343(13) | 6460(7)  | 6161(7) | 96(4)  |
| D(19) | 8065     | 6871     | 6788    | 116    |

**Table 3.** Bond lengths [Å] and angles [°] for **1b**.

---

|             |            |
|-------------|------------|
| Mo(1)-Cl(1) | 2.286(2)   |
| Mo(1)-O(2)  | 2.355(4)   |
| Mo(1)-Cl(3) | 2.3673(19) |
| Mo(1)-Cl(4) | 2.4097(19) |
| Mo(1)-Cl(5) | 2.3680(18) |
| Mo(1)-O(1)  | 1.651(5)   |
| O(2)-H(2A)  | 0.8926     |
| O(2)-H(2B)  | 0.8928     |
| Se(1)-C(1)  | 1.924(7)   |
| Se(1)-C(7)  | 1.927(6)   |
| Se(1)-C(18) | 1.909(6)   |
| C(1)-C(2)   | 1.376(9)   |
| C(1)-C(6)   | 1.390(9)   |
| C(2)-H(2)   | 0.9500     |
| C(2)-C(3)   | 1.387(11)  |
| C(3)-H(3)   | 0.9500     |
| C(3)-C(4)   | 1.399(11)  |
| C(4)-H(4)   | 0.9500     |
| C(4)-C(5)   | 1.352(12)  |
| C(5)-H(5)   | 0.9500     |
| C(5)-C(6)   | 1.389(12)  |
| C(6)-H(6)   | 0.9500     |
| C(7)-C(8)   | 1.360(10)  |
| C(7)-C(12)  | 1.399(9)   |
| C(8)-H(8)   | 0.9500     |
| C(8)-C(9)   | 1.400(11)  |
| C(9)-H(9)   | 0.9500     |
| C(9)-C(10)  | 1.375(12)  |
| C(10)-H(10) | 0.9500     |
| C(10)-C(11) | 1.367(12)  |
| C(11)-H(11) | 0.9500     |
| C(11)-C(12) | 1.390(10)  |
| C(12)-C(13) | 1.464(10)  |
| C(13)-C(14) | 1.401(10)  |
| C(13)-C(18) | 1.385(9)   |
| C(14)-H(14) | 0.9500     |
| C(14)-C(15) | 1.380(13)  |
| C(15)-H(15) | 0.9500     |
| C(15)-C(16) | 1.382(13)  |
| C(16)-H(16) | 0.9500     |
| C(16)-C(17) | 1.398(11)  |
| C(17)-H(17) | 0.9500     |
| C(17)-C(18) | 1.380(10)  |
| Cl(6)-C(19) | 1.736(8)   |

---

---

|                   |           |
|-------------------|-----------|
| Cl(7)-C(19)       | 1.735(9)  |
| Cl(8)-C(19)       | 1.719(8)  |
| C(19)-D(19)       | 1.0000    |
| Cl(1)-Mo(1)-O(2)  | 82.99(12) |
| Cl(1)-Mo(1)-Cl(3) | 89.52(8)  |
| Cl(1)-Mo(1)-Cl(4) | 164.04(8) |
| Cl(1)-Mo(1)-Cl(5) | 89.00(8)  |
| O(2)-Mo(1)-Cl(3)  | 80.58(13) |
| O(2)-Mo(1)-Cl(4)  | 81.06(12) |
| O(2)-Mo(1)-Cl(5)  | 81.34(12) |
| Cl(3)-Mo(1)-Cl(4) | 88.41(7)  |
| Cl(3)-Mo(1)-Cl(5) | 161.90(7) |
| Cl(5)-Mo(1)-Cl(4) | 88.07(7)  |
| O(1)-Mo(1)-Cl(1)  | 99.2(2)   |
| O(1)-Mo(1)-O(2)   | 177.8(3)  |
| O(1)-Mo(1)-Cl(3)  | 99.6(2)   |
| O(1)-Mo(1)-Cl(4)  | 96.8(2)   |
| O(1)-Mo(1)-Cl(5)  | 98.4(2)   |
| Mo(1)-O(2)-H(2A)  | 110.4     |
| Mo(1)-O(2)-H(2B)  | 110.7     |
| H(2A)-O(2)-H(2B)  | 103.3     |
| C(1)-Se(1)-C(7)   | 101.1(3)  |
| C(18)-Se(1)-C(1)  | 100.0(3)  |
| C(18)-Se(1)-C(7)  | 87.0(3)   |
| C(2)-C(1)-Se(1)   | 121.3(5)  |
| C(2)-C(1)-C(6)    | 122.9(7)  |
| C(6)-C(1)-Se(1)   | 115.9(5)  |
| C(1)-C(2)-H(2)    | 120.7     |
| C(1)-C(2)-C(3)    | 118.5(6)  |
| C(3)-C(2)-H(2)    | 120.7     |
| C(2)-C(3)-H(3)    | 120.4     |
| C(2)-C(3)-C(4)    | 119.2(7)  |
| C(4)-C(3)-H(3)    | 120.4     |
| C(3)-C(4)-H(4)    | 119.6     |
| C(5)-C(4)-C(3)    | 120.8(8)  |
| C(5)-C(4)-H(4)    | 119.6     |
| C(4)-C(5)-H(5)    | 119.3     |
| C(4)-C(5)-C(6)    | 121.4(7)  |
| C(6)-C(5)-H(5)    | 119.3     |
| C(1)-C(6)-H(6)    | 121.5     |
| C(5)-C(6)-C(1)    | 117.1(7)  |
| C(5)-C(6)-H(6)    | 121.5     |
| C(8)-C(7)-Se(1)   | 125.5(5)  |

---

---

|                   |          |
|-------------------|----------|
| C(8)-C(7)-C(12)   | 123.6(6) |
| C(12)-C(7)-Se(1)  | 110.9(5) |
| C(7)-C(8)-H(8)    | 121.4    |
| C(7)-C(8)-C(9)    | 117.2(7) |
| C(9)-C(8)-H(8)    | 121.4    |
| C(8)-C(9)-H(9)    | 119.9    |
| C(10)-C(9)-C(8)   | 120.2(8) |
| C(10)-C(9)-H(9)   | 119.9    |
| C(9)-C(10)-H(10)  | 119.1    |
| C(9)-C(10)-C(11)  | 121.9(7) |
| C(11)-C(10)-H(10) | 119.1    |
| C(10)-C(11)-H(11) | 120.3    |
| C(10)-C(11)-C(12) | 119.4(7) |
| C(12)-C(11)-H(11) | 120.3    |
| C(7)-C(12)-C(13)  | 114.9(6) |
| C(11)-C(12)-C(7)  | 117.8(7) |
| C(11)-C(12)-C(13) | 127.3(6) |
| C(14)-C(13)-C(12) | 126.8(7) |
| C(18)-C(13)-C(12) | 115.1(6) |
| C(18)-C(13)-C(14) | 118.1(7) |
| C(13)-C(14)-H(14) | 120.8    |
| C(15)-C(14)-C(13) | 118.5(8) |
| C(15)-C(14)-H(14) | 120.8    |
| C(14)-C(15)-H(15) | 118.5    |
| C(14)-C(15)-C(16) | 122.9(7) |
| C(16)-C(15)-H(15) | 118.5    |
| C(15)-C(16)-H(16) | 120.5    |
| C(15)-C(16)-C(17) | 119.1(8) |
| C(17)-C(16)-H(16) | 120.5    |
| C(16)-C(17)-H(17) | 121.1    |
| C(18)-C(17)-C(16) | 117.7(7) |
| C(18)-C(17)-H(17) | 121.1    |
| C(13)-C(18)-Se(1) | 111.9(5) |
| C(17)-C(18)-Se(1) | 124.4(5) |
| C(17)-C(18)-C(13) | 123.6(6) |
| Cl(6)-C(19)-D(19) | 108.3    |
| Cl(7)-C(19)-Cl(6) | 107.1(5) |
| Cl(7)-C(19)-D(19) | 108.3    |
| Cl(8)-C(19)-Cl(6) | 114.2(5) |
| Cl(8)-C(19)-Cl(7) | 110.6(6) |
| Cl(8)-C(19)-D(19) | 108.3    |

---

Symmetry transformations used to generate equivalent atoms:

**Table 3.** Anisotropic displacement parameters ( $\text{\AA}^2 \times 10^3$ ) for **1b**.

(The anisotropic displacement factor exponent takes the form:  $-2 \pi^2 [ h^2 a^{*2} U_{11} + \dots + 2 h k a^* b^* U_{12} ]$ )

|       | U11     | U22    | U33    | U23   | U13    | U12   |
|-------|---------|--------|--------|-------|--------|-------|
| Mo(1) | 42(1)   | 27(1)  | 43(1)  | 4(1)  | -2(1)  | 12(1) |
| Cl(1) | 74(1)   | 69(1)  | 44(1)  | 21(1) | 15(1)  | 20(1) |
| O(2)  | 43(3)   | 25(2)  | 38(3)  | 9(2)  | 3(2)   | 3(2)  |
| Cl(3) | 43(1)   | 52(1)  | 54(1)  | 14(1) | -1(1)  | 19(1) |
| Cl(4) | 62(1)   | 33(1)  | 46(1)  | 20(1) | 7(1)   | 7(1)  |
| Cl(5) | 40(1)   | 38(1)  | 48(1)  | 5(1)  | -4(1)  | 10(1) |
| O(1)  | 69(4)   | 31(3)  | 67(4)  | -8(3) | -8(3)  | 19(3) |
| Se(1) | 34(1)   | 27(1)  | 38(1)  | 16(1) | 0(1)   | 4(1)  |
| C(1)  | 31(3)   | 25(3)  | 33(3)  | 7(3)  | 0(3)   | 0(3)  |
| C(2)  | 37(4)   | 40(4)  | 47(4)  | 14(3) | -3(3)  | 15(3) |
| C(3)  | 53(5)   | 61(5)  | 46(5)  | 19(4) | 2(4)   | 17(4) |
| C(4)  | 71(6)   | 52(5)  | 43(5)  | 4(4)  | 4(4)   | 24(4) |
| C(5)  | 73(6)   | 34(4)  | 63(5)  | 7(4)  | 1(4)   | 24(4) |
| C(6)  | 47(4)   | 34(4)  | 58(5)  | 20(4) | -3(4)  | 9(3)  |
| C(7)  | 41(4)   | 26(3)  | 34(4)  | 8(3)  | 5(3)   | 3(3)  |
| C(8)  | 42(4)   | 37(4)  | 43(4)  | 5(3)  | -2(3)  | 2(3)  |
| C(9)  | 51(5)   | 46(5)  | 58(5)  | 6(4)  | -1(4)  | -5(4) |
| C(10) | 70(6)   | 32(4)  | 50(5)  | 12(4) | 16(4)  | -4(4) |
| C(11) | 68(5)   | 25(3)  | 44(4)  | 5(3)  | 9(4)   | 12(3) |
| C(12) | 48(4)   | 25(3)  | 28(3)  | 5(3)  | 3(3)   | 4(3)  |
| C(13) | 44(4)   | 37(4)  | 31(4)  | 11(3) | 13(3)  | 19(3) |
| C(14) | 61(5)   | 49(5)  | 51(5)  | 18(4) | 9(4)   | 29(4) |
| C(15) | 45(5)   | 85(7)  | 67(6)  | 28(5) | -2(4)  | 28(5) |
| C(16) | 31(4)   | 77(6)  | 60(5)  | 22(5) | -6(4)  | 5(4)  |
| C(17) | 34(4)   | 53(5)  | 50(5)  | 20(4) | 7(3)   | -2(3) |
| C(18) | 33(4)   | 37(4)  | 36(4)  | 13(3) | 5(3)   | 7(3)  |
| Cl(6) | 199(4)  | 121(3) | 114(3) | 34(2) | 54(3)  | 39(3) |
| Cl(7) | 155(3)  | 159(4) | 93(2)  | 61(2) | 4(2)   | 63(3) |
| Cl(8) | 213(5)  | 72(2)  | 134(3) | 27(2) | -34(3) | 43(3) |
| C(19) | 182(13) | 49(6)  | 55(6)  | -1(5) | -16(7) | 28(7) |

**Table 4.** Hydrogen coordinates ( $\times 10^4$ ) and isotropic displacement parameters ( $\text{\AA}^2 \times 10^3$ ) for **1b**.

|       | x    | y     | z    | U(eq) |
|-------|------|-------|------|-------|
| H(2A) | 8785 | 9417  | 408  | 53    |
| H(2B) | 7174 | 9509  | 114  | 53    |
| H(2)  | 4610 | 7226  | 3529 | 48    |
| H(3)  | 3404 | 8101  | 5046 | 62    |
| H(4)  | 2417 | 9840  | 5128 | 66    |
| H(5)  | 2471 | 10624 | 3719 | 67    |
| H(6)  | 3600 | 9750  | 2176 | 54    |

|       |       |      |      |    |
|-------|-------|------|------|----|
| H(8)  | 1746  | 6269 | 678  | 50 |
| H(9)  | 793   | 4282 | 440  | 65 |
| H(10) | 2547  | 3087 | 809  | 62 |
| H(11) | 5213  | 3793 | 1465 | 55 |
| H(14) | 7897  | 4780 | 2198 | 61 |
| H(15) | 10329 | 5967 | 2883 | 74 |
| H(16) | 10716 | 7921 | 2984 | 67 |
| H(17) | 8576  | 8741 | 2357 | 55 |

**Table 5.** Torsion angles [°] for **1b**.

|                         |           |
|-------------------------|-----------|
| Se(1)-C(1)-C(2)-C(3)    | -178.7(6) |
| Se(1)-C(1)-C(6)-C(5)    | 179.7(6)  |
| Se(1)-C(7)-C(8)-C(9)    | 178.1(6)  |
| Se(1)-C(7)-C(12)-C(11)  | -177.4(5) |
| Se(1)-C(7)-C(12)-C(13)  | 2.6(7)    |
| C(1)-C(2)-C(3)-C(4)     | -1.6(12)  |
| C(2)-C(1)-C(6)-C(5)     | 0.5(11)   |
| C(2)-C(3)-C(4)-C(5)     | 2.0(14)   |
| C(3)-C(4)-C(5)-C(6)     | -1.1(14)  |
| C(4)-C(5)-C(6)-C(1)     | -0.2(13)  |
| C(6)-C(1)-C(2)-C(3)     | 0.4(11)   |
| C(7)-C(8)-C(9)-C(10)    | -0.9(12)  |
| C(7)-C(12)-C(13)-C(14)  | 178.0(7)  |
| C(7)-C(12)-C(13)-C(18)  | -0.1(9)   |
| C(8)-C(7)-C(12)-C(11)   | 1.1(10)   |
| C(8)-C(7)-C(12)-C(13)   | -178.9(6) |
| C(8)-C(9)-C(10)-C(11)   | 1.2(13)   |
| C(9)-C(10)-C(11)-C(12)  | -0.3(12)  |
| C(10)-C(11)-C(12)-C(7)  | -0.9(10)  |
| C(10)-C(11)-C(12)-C(13) | 179.2(7)  |
| C(11)-C(12)-C(13)-C(14) | -2.1(12)  |
| C(11)-C(12)-C(13)-C(18) | 179.8(7)  |
| C(12)-C(7)-C(8)-C(9)    | -0.2(11)  |
| C(12)-C(13)-C(14)-C(15) | -178.1(7) |
| C(12)-C(13)-C(18)-Se(1) | -2.4(7)   |
| C(12)-C(13)-C(18)-C(17) | -179.6(6) |
| C(13)-C(14)-C(15)-C(16) | -1.0(13)  |
| C(14)-C(13)-C(18)-Se(1) | 179.3(5)  |
| C(14)-C(13)-C(18)-C(17) | 2.1(11)   |
| C(14)-C(15)-C(16)-C(17) | -0.1(14)  |
| C(15)-C(16)-C(17)-C(18) | 2.1(12)   |
| C(16)-C(17)-C(18)-Se(1) | -180.0(6) |
| C(16)-C(17)-C(18)-C(13) | -3.1(11)  |
| C(18)-C(13)-C(14)-C(15) | 0.0(11)   |

Symmetry transformations used to generate equivalent atoms:

**Table 6.** Hydrogen bonds for **1b** [Å and °].

| D-H...A | d(D-H) | d(H...A) | d(D...A) | <(DHA) |
|---------|--------|----------|----------|--------|
|---------|--------|----------|----------|--------|

## 7.2 X-ray structure of compound **8e**.

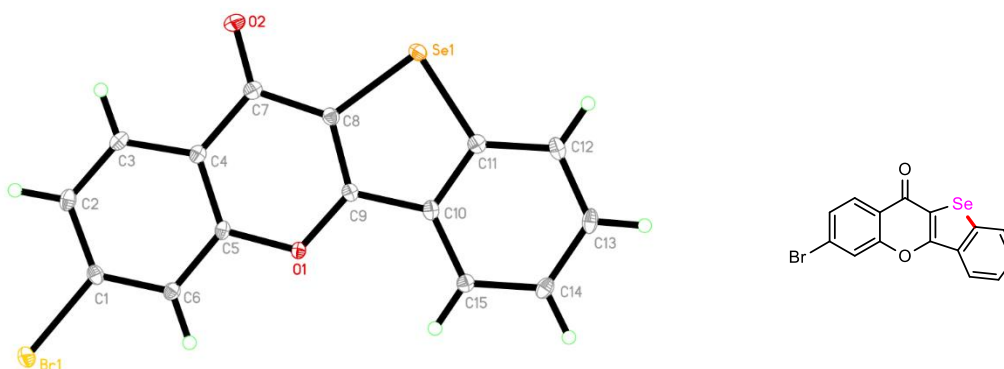

**Table 7.** Sample and crystal data for **8e**.

|                        |                                                                                        |
|------------------------|----------------------------------------------------------------------------------------|
| Identification code    | <b>8e</b>                                                                              |
| Chemical formula       | C <sub>15</sub> H <sub>7</sub> BrO <sub>2</sub> Se                                     |
| Formula weight         | 378.08 g/mol                                                                           |
| Wavelength             | 0.71073 Å                                                                              |
| Crystal size           | 0.200 × 0.230 × 0.250 mm                                                               |
| Crystal system         | monoclinic                                                                             |
| Space group            | P 1 21/c 1                                                                             |
| Unit cell dimensions   | a = 12.133(2) Å α = 90°<br>b = 7.2784(13) Å β = 107.078(6)°<br>c = 14.645(2) Å γ = 90° |
| Volume                 | 1236.3(4) Å <sup>3</sup>                                                               |
| Z                      | 4                                                                                      |
| Density (calculated)   | 2.031 g/cm <sup>3</sup>                                                                |
| Absorption coefficient | 6.261 mm <sup>-1</sup>                                                                 |
| F(000)                 | 728                                                                                    |

**Table 8.** Data collection and structure refinement for **8e**.

|                                 |                                        |
|---------------------------------|----------------------------------------|
| Theta range for data collection | 2.91 to 28.30°                         |
| Index ranges                    | -16 ≤ h ≤ 16, -9 ≤ k ≤ 9, -19 ≤ l ≤ 18 |



|                              |                                                                                               |
|------------------------------|-----------------------------------------------------------------------------------------------|
| Reflections collected        | 28000                                                                                         |
| Independent reflections      | 3075 [R(int) = 0.0754]                                                                        |
| Max. and min. transmission   | 0.7457 and 0.4644                                                                             |
| Structure solution technique | direct methods                                                                                |
| Structure solution program   | SHELXT 2014/5 (Sheldrick, 2014)                                                               |
| Refinement method            | Full-matrix least-squares on F <sup>2</sup>                                                   |
| Refinement program           | SHELXL 2018/3 (Sheldrick, 2015)                                                               |
| Function minimized           | $\Sigma w(\text{Fo}^2 - \text{Fc}^2)^2$                                                       |
| Data/restraints/parameters   | 3075 / 0 / 173                                                                                |
| Goodness-of-fit on F2        | 1.035                                                                                         |
| $\Delta/\sigma_{\text{max}}$ | 0.002                                                                                         |
| Final R indices              | Final R indices R1 = 0.0238, wR2 = 0.0510<br>all data R1 = 0.0286, wR2 = 0.0524               |
| Weighting scheme             | $w=1/[\sigma^2(\text{Fo}^2)+1.0174\text{P}]$<br>where $\text{P}=(\text{Fo}^2+2\text{Fc}^2)/3$ |
| Extinction coefficient       | 0.0035(5)                                                                                     |
| Largest diff. peak and hole  | 0.433 and -0.344 eÅ <sup>-3</sup>                                                             |
| R.M.S. deviation from mean   | 0.083 eÅ <sup>-3</sup>                                                                        |

**Table 9.** Atomic coordinates and equivalent isotropic atomic displacement parameters (Å<sup>2</sup>) for **8e**.

U(eq) is defined as one-third of the trace of the orthogonalized U<sub>ij</sub> tensor.

|     | x/a         | y/b         | z/c         | U(eq)      |
|-----|-------------|-------------|-------------|------------|
| Br1 | 0.95752(2)  | 0.41201(3)  | 0.88627(2)  | 0.02247(8) |
| Se1 | 0.54838(2)  | 0.73159(3)  | 0.31459(2)  | 0.01810(7) |
| O1  | 0.63159(11) | 0.64876(19) | 0.59855(9)  | 0.0143(3)  |
| O2  | 0.80504(13) | 0.5569(2)   | 0.39823(11) | 0.0256(3)  |
| C1  | 0.89515(17) | 0.4628(3)   | 0.75414(14) | 0.0164(4)  |
| C2  | 0.95954(17) | 0.4209(3)   | 0.69190(15) | 0.0187(4)  |
| C3  | 0.91270(17) | 0.4595(3)   | 0.59644(15) | 0.0175(4)  |
| C4  | 0.80300(17) | 0.5389(3)   | 0.56071(14) | 0.0151(4)  |
| C5  | 0.74101(16) | 0.5752(3)   | 0.62559(14) | 0.0143(4)  |
| C6  | 0.78684(17) | 0.5398(3)   | 0.72313(14) | 0.0156(4)  |
| C7  | 0.75350(17) | 0.5810(3)   | 0.45807(14) | 0.0172(4)  |
| C8  | 0.63850(17) | 0.6553(3)   | 0.43663(14) | 0.0155(4)  |
| C9  | 0.58449(16) | 0.6873(3)   | 0.50454(14) | 0.0141(4)  |
| C10 | 0.47183(16) | 0.7696(3)   | 0.47303(14) | 0.0144(4)  |
| C11 | 0.43638(17) | 0.8046(3)   | 0.37441(14) | 0.0164(4)  |
| C12 | 0.32984(18) | 0.8862(3)   | 0.32950(15) | 0.0191(4)  |
| C13 | 0.25993(17) | 0.9315(3)   | 0.38544(16) | 0.0200(4)  |
| C14 | 0.29407(17) | 0.8977(3)   | 0.48430(15) | 0.0184(4)  |
| C15 | 0.39931(16) | 0.8168(3)   | 0.52818(14) | 0.0156(4)  |

**Table 10.** Bond lengths (Å) for **8e**.

|         |          |         |          |
|---------|----------|---------|----------|
| Br1-C1  | 1.896(2) | Se1-C8  | 1.884(2) |
| Se1-C11 | 1.896(2) | O1-C5   | 1.377(2) |
| O1-C9   | 1.356(2) | O2-C7   | 1.230(2) |
| C1-C2   | 1.397(3) | C1-C6   | 1.377(3) |
| C2-H2   | 0.95     | C2-C3   | 1.375(3) |
| C3-H3   | 0.95     | C3-C4   | 1.404(3) |
| C4-C5   | 1.399(3) | C4-C7   | 1.478(3) |
| C5-C6   | 1.396(3) | C6-H6   | 0.95     |
| C7-C8   | 1.442(3) | C8-C9   | 1.362(3) |
| C9-C10  | 1.438(3) | C10-C11 | 1.404(3) |
| C10-C15 | 1.401(3) | C11-C12 | 1.399(3) |
| C12-H12 | 0.95     | C12-C13 | 1.381(3) |
| C13-H13 | 0.95     | C13-C14 | 1.406(3) |
| C14-H14 | 0.95     | C14-C15 | 1.381(3) |
| C15-H15 | 0.95     |         |          |

**Table 11.** Bond angles (°) for **8e**.

|             |            |             |            |
|-------------|------------|-------------|------------|
| C8-Se1-C11  | 86.52(9)   | C9-O1-C5    | 117.10(15) |
| C2-C1-Br1   | 119.43(15) | C6-C1-Br1   | 118.17(15) |
| C6-C1-C2    | 122.40(18) | C1-C2-H2    | 120.8      |
| C3-C2-C1    | 118.39(18) | C3-C2-H2    | 120.8      |
| C2-C3-H3    | 119.1      | C2-C3-C4    | 121.80(18) |
| C4-C3-H3    | 119.1      | C3-C4-C7    | 121.49(18) |
| C5-C4-C3    | 117.67(18) | C5-C4-C7    | 120.84(17) |
| O1-C5-C4    | 122.89(17) | O1-C5-C6    | 115.23(17) |
| C6-C5-C4    | 121.88(18) | C1-C6-C5    | 117.84(18) |
| C1-C6-H6    | 121.1      | C5-C6-H6    | 121.1      |
| O2-C7-C4    | 123.73(18) | O2-C7-C8    | 124.09(19) |
| C8-C7-C4    | 112.18(17) | C7-C8-Se1   | 124.87(14) |
| C9-C8-Se1   | 111.88(15) | C9-C8-C7    | 123.17(18) |
| O1-C9-C8    | 123.80(17) | O1-C9-C10   | 119.30(17) |
| C8-C9-C10   | 116.90(18) | C11-C10-C9  | 112.39(17) |
| C15-C10-C9  | 128.00(18) | C15-C10-C11 | 119.61(18) |
| C10-C11-Se1 | 112.32(15) | C12-C11-Se1 | 126.18(16) |
| C12-C11-C10 | 121.49(19) | C11-C12-H12 | 121.1      |
| C13-C12-C11 | 117.78(19) | C13-C12-H12 | 121.1      |
| C12-C13-H13 | 119.2      | C12-C13-C14 | 121.51(19) |
| C14-C13-H13 | 119.2      | C13-C14-H14 | 119.8      |
| C15-C14-C13 | 120.42(19) | C15-C14-H14 | 119.8      |
| C10-C15-H15 | 120.4      | C14-C15-C10 | 119.19(18) |
| C14-C15-H15 | 120.4      |             |            |

**Table 12.** Torsion angles (°) for **8e**.

|              |             |              |             |
|--------------|-------------|--------------|-------------|
| Br1-C1-C2-C3 | -179.80(15) | Br1-C1-C6-C5 | -179.38(14) |
|--------------|-------------|--------------|-------------|

|                 |             |                 |             |
|-----------------|-------------|-----------------|-------------|
| Se1-C8-C9-O1    | -178.59(14) | Se1-C8-C9-C10   | 0.4(2)      |
| Se1-C11-C12-C13 | -179.41(15) | O1-C5-C6-C1     | 178.76(17)  |
| O1-C9-C10-C11   | 178.67(16)  | O1-C9-C10-C15   | -0.6(3)     |
| O2-C7-C8-Se1    | -1.1(3)     | O2-C7-C8-C9     | -177.5(2)   |
| C1-C2-C3-C4     | -0.1(3)     | C2-C1-C6-C5     | 0.4(3)      |
| C2-C3-C4-C5     | -1.1(3)     | C2-C3-C4-C7     | 179.62(18)  |
| C3-C4-C5-O1     | -178.45(17) | C3-C4-C5-C6     | 2.0(3)      |
| C3-C4-C7-O2     | -2.8(3)     | C3-C4-C7-C8     | 177.79(18)  |
| C4-C5-C6-C1     | -1.6(3)     | C4-C7-C8-Se1    | 178.35(14)  |
| C4-C7-C8-C9     | 1.9(3)      | C5-O1-C9-C8     | 0.9(3)      |
| C5-O1-C9-C10    | -178.12(16) | C5-C4-C7-O2     | 178.0(2)    |
| C5-C4-C7-C8     | -1.5(3)     | C6-C1-C2-C3     | 0.4(3)      |
| C7-C4-C5-O1     | 0.8(3)      | C7-C4-C5-C6     | -178.75(18) |
| C7-C8-C9-O1     | -1.7(3)     | C7-C8-C9-C10    | 177.26(18)  |
| C8-Se1-C11-C10  | 0.05(15)    | C8-Se1-C11-C12  | 179.44(19)  |
| C8-C9-C10-C11   | -0.4(3)     | C8-C9-C10-C15   | -179.67(19) |
| C9-O1-C5-C4     | -0.4(3)     | C9-O1-C5-C6     | 179.17(16)  |
| C9-C10-C11-Se1  | 0.2(2)      | C9-C10-C11-C12  | -179.27(18) |
| C9-C10-C15-C14  | 179.05(19)  | C10-C11-C12-C13 | -0.1(3)     |
| C11-Se1-C8-C7   | -177.04(18) | C11-Se1-C8-C9   | -0.25(15)   |
| C11-C10-C15-C14 | -0.2(3)     | C11-C12-C13-C14 | 0.2(3)      |
| C12-C13-C14-C15 | -0.3(3)     | C13-C14-C15-C10 | 0.3(3)      |
| C15-C10-C11-Se1 | 179.51(14)  | C15-C10-C11-C12 | 0.1(3)      |

**Table 13.** Hydrogen bond distances (Å) and angles (°) for **8e**.

|              | <b>Donor-H</b> | <b>Acceptor-H</b> | <b>Donor-Acceptor</b> | <b>Angle</b> |
|--------------|----------------|-------------------|-----------------------|--------------|
| C6-H6...Se1  | 0.95           | 3.05              | 3.900(2)              | 150.4        |
| C12-H12...O2 | 0.95           | 2.58              | 3.484(3)              | 158.9        |

## 8. Characterization of products.

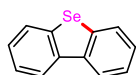

### Dibenzoselenophene (1c)

Purification by PTLC ( $R_f = 0.56$  in petroleum ether) afforded **1c** as a yellow solid (43.4 mg, 94% yield). Mp = 53-55°C.  $^1\text{H}$  NMR (400 MHz, Chloroform-*d*)  $\delta$  8.14 (dd,  $J = 7.9, 1.3$  Hz, 2H), 7.86 (td,  $J = 7.6, 1.2$  Hz, 2H), 7.47 (td,  $J = 7.6, 1.2$  Hz, 2H), 7.40 (td,  $J = 7.6, 1.4$  Hz, 2H).  $^{13}\text{C}$  NMR (101 MHz, Chloroform-*d*)  $\delta$  139.3, 138.3, 126.8, 126.1, 124.8, 122.8.  $^{77}\text{Se}$  NMR (114 MHz, Chloroform-*d*)  $\delta = 450.5$ . IR (KBr,  $\text{cm}^{-1}$ ):  $\nu$  2955, 2930, 1570, 1434, 1423, 1327, 1261, 1221, 1038, 1002, 896, 861, 729, 632; GC-MS (EI): calcd. for  $\text{C}_{12}\text{H}_8\text{Se}$  [ $\text{M}^+$ ] 231.9; found 232.0.

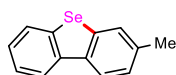

### 3-Methyldibenzo[*b,d*]selenophene (2c)

Purification by PTLC ( $R_f = 0.52$  in petroleum ether) afforded **2c** as a yellow solid (40.2 mg, 82% yield). Mp = 73.5-75°C.  $^1\text{H}$  NMR (400 MHz, Chloroform-*d*)  $\delta$  8.01 (dd,  $J = 7.9, 1.3$  Hz, 1H), 7.93 (d,  $J = 8.1$  Hz, 1H), 7.82 – 7.75 (dd, 1H), 7.62 (s, 1H), 7.37 (td,  $J = 7.5, 1.2$  Hz, 1H), 7.32 – 7.25 (m, 1H), 7.21 (d,  $J = 1.5$  Hz, 1H), 2.41 (s, 3H).  $^{13}\text{C}$  NMR (101 MHz, Chloroform-*d*)  $\delta$  139.5, 138.9, 138.4, 137.0, 135.9, 126.4, 126.3, 126.2, 126.1, 124.8, 122.5, 122.5, 21.6. IR (KBr,  $\text{cm}^{-1}$ ):  $\nu$  2976, 2943, 1583, 1456, 1346, 1286, 1247, 1057, 1036, 885, 757, 664; GC-MS (EI): calcd. for  $\text{C}_{13}\text{H}_{10}\text{Se}$  [ $\text{M}^+$ ] 245.9; found 246.0.

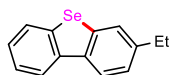

### 3-Ethyldibenzo[*b,d*]selenophene (3c)

Purification by PTLC ( $R_f = 0.50$  in petroleum ether) afforded **3c** as a yellow solid (49.2 mg, 90% yield). Mp = 43-45.6°C.  $^1\text{H}$  NMR (400 MHz, Chloroform-*d*)  $\delta$  8.07 (dd,  $J = 7.9, 1.3$  Hz, 1H), 8.02 (d,  $J = 8.1$  Hz, 1H), 7.85 (d,  $J = 7.8$  Hz, 1H), 7.71 (s, 1H), 7.43 (td,  $J = 7.6, 1.1$  Hz, 1H), 7.35 (td,  $J = 7.6, 1.3$  Hz, 1H), 7.29 (dd,  $J = 8.1, 1.5$  Hz, 1H), 2.77 (q,  $J = 7.6$  Hz, 2H), 1.31 (t,  $J = 7.6$  Hz, 3H).  $^{13}\text{C}$  NMR (101 MHz, Chloroform-*d*)  $\delta$  143.5, 139.5, 139.0, 138.4, 136.1, 126.4, 126.1, 125.2, 125.0, 124.8, 122.6, 122.6, 29.0, 15.8. IR (KBr,  $\text{cm}^{-1}$ ):  $\nu$  2967, 2955, 2867, 1587, 1456, 1446, 1367, 1283, 1257, 1046, 1034, 936, 876, 744, 657; GC-MS (EI): calcd. for  $\text{C}_{14}\text{H}_{12}\text{Se}$  [ $\text{M}^+$ ] 260.0; found 260.1.

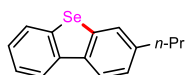

### 3-Propyldibenzo[*b,d*]selenophene (4c)

Purification by PTLC ( $R_f = 0.45$  in petroleum ether) afforded **4c** as a yellow oily liquid (50.8 mg, 93% yield).  $^1\text{H}$  NMR (400 MHz, Chloroform-*d*)  $\delta$  8.10 (d,  $J = 7.8$  Hz, 1H), 8.04 (d,  $J = 8.0$  Hz, 1H), 7.89 (d,  $J = 7.9$  Hz, 1H), 7.71 (s, 1H), 7.46 (t,  $J = 7.5$  Hz, 1H), 7.38 (t,  $J = 7.5$  Hz, 1H), 7.29 (dd,  $J = 8.1, 1.5$  Hz, 1H), 2.73 (t,  $J = 7.6$  Hz, 2H), 1.82 –

1.66 (m, 2H), 1.01 (td,  $J = 7.3, 1.5$  Hz, 3H).  $^{13}\text{C}$  NMR (101 MHz, Chloroform- $d$ )  $\delta$  141.8, 138.9, 138.3, 136.0, 126.4, 126.0, 125.7, 125.6, 124.7, 122.5, 122.5, 38.0, 24.6, 13.8. IR (KBr,  $\text{cm}^{-1}$ ):  $\nu$  2975, 2937, 2853, 1563, 1474, 1463, 1375, 1297, 1263, 1057, 1053, 958, 883, 755, 681; GC-MS (EI): calcd. for  $\text{C}_{15}\text{H}_{14}\text{Se}$  [ $\text{M}^+$ ] 274.0; found 274.1.

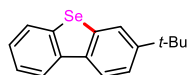

### 3-(*Tert*-butyl)dibenzo[*b,d*]selenophene (**5c**)

Purification by PTLC ( $R_f = 0.45$  in petroleum ether) afforded **5c** as a yellow solid (51.7 mg, 90% yield). Mp = 63.8-65.5°C.  $^1\text{H}$  NMR (500 MHz, Chloroform- $d$ )  $\delta$  8.10 (d,  $J = 7.9$  Hz, 1H), 8.06 (d,  $J = 8.4$  Hz, 1H), 7.92 (s, 1H), 7.88 (d,  $J = 7.9$  Hz, 1H), 7.52 (d,  $J = 8.5$  Hz, 1H), 7.46 (t,  $J = 7.4$  Hz, 1H), 7.37 (t,  $J = 7.6$  Hz, 1H), 1.43 (s, 9H).  $^{13}\text{C}$  NMR (126 MHz, Chloroform- $d$ )  $\delta$  150.4, 138.3, 139.4, 139.2, 135.8, 126.4, 126.1, 124.8, 122.8, 122.6, 122.5, 122.4, 35.1, 31.5. IR (KBr,  $\text{cm}^{-1}$ ):  $\nu$  2963, 2945, 2855, 1739, 1572, 1435, 1376, 1247, 1228, 991, 812, 745, 717; GC-MS (EI): calcd. for  $\text{C}_{16}\text{H}_{16}\text{Se}$  [ $\text{M}^+$ ] 288.0; found 288.1.

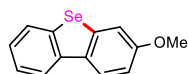

### 3-Methoxydibenzo[*b,d*]selenophene (**6c**)

Purification by PTLC ( $R_f = 0.40$  in petroleum ether) afforded **6c** as a yellow solid (45.9 mg, 85% yield). Mp = 67-69°C.  $^1\text{H}$  NMR (400 MHz, Chloroform- $d$ )  $\delta$  8.00 (dd,  $J = 8.5, 2.5$  Hz, 2H), 7.83 (dd,  $J = 8.7, 2.4$  Hz, 1H), 7.43 (td,  $J = 7.6, 1.3$  Hz, 1H), 7.38 (d,  $J = 2.4$  Hz, 1H), 7.32 (td,  $J = 7.6, 1.3$  Hz, 1H), 7.05 (dd,  $J = 8.7, 2.4$  Hz, 1H), 3.90 (s, 3H).  $^{13}\text{C}$  NMR (101 MHz, Chloroform- $d$ )  $\delta$  159.0, 140.7, 138.4, 138.2, 131.7, 125.9, 125.8, 124.9, 123.4, 122.1, 113.4, 109.5, 55.6. IR (KBr,  $\text{cm}^{-1}$ ):  $\nu$  2973, 2929, 1555, 1486, 1457, 1437, 1256, 1214, 1068, 1012, 776, 751, 721, 682; GC-MS (EI): calcd. for  $\text{C}_{13}\text{H}_{10}\text{OSe}$  [ $\text{M}^+$ ] 261.9; found 262.0.

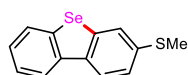

### Dibenzo[*b,d*]selenophen-3-yl(methyl)sulfane (**7c**)

Purification by PTLC ( $R_f = 0.36$  in petroleum ether) afforded **7c** as a white solid (49.3 mg, 89% yield). Mp = 95-97°C.  $^1\text{H}$  NMR (400 MHz, Chloroform- $d$ )  $\delta$  8.06 (d,  $J = 7.9$  Hz, 1H), 7.99 (d,  $J = 8.3$  Hz, 1H), 7.86 (d,  $J = 7.9$  Hz, 1H), 7.74 (d,  $J = 1.8$  Hz, 1H), 7.45 (t,  $J = 7.5$  Hz, 1H), 7.41 – 7.30 (m, 2H), 2.57 (s, 3H).  $^{13}\text{C}$  NMR (101 MHz, Chloroform- $d$ )  $\delta$  140.2, 138.9, 138.0, 137.7, 135.6, 126.7, 126.1, 125.0, 124.0, 123.1, 122.8, 122.6, 16.2. IR (KBr,  $\text{cm}^{-1}$ ):  $\nu$  2965, 2913, 1543, 1472, 1442, 1419, 1237, 1191, 1043, 1002, 767, 734, 705, 664; GC-MS (EI): calcd. for  $\text{C}_{13}\text{H}_{10}\text{SSe}$  [ $\text{M}^+$ ] 277.9; found 278.0.

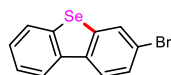

### 3-Bromodibenzo[*b,d*]selenophene (**8c**)

Purification by PTLC ( $R_f = 0.48$  in petroleum ether) afforded **8c** as a yellow solid (55.2 mg, 89% yield). Mp = 83.5-86°C.  $^1\text{H}$  NMR (500 MHz, Chloroform-*d*)  $\delta$  8.09 – 8.01 (m, 1H), 7.98 (d,  $J = 4.9$  Hz, 1H), 7.90 (ddd,  $J = 11.3, 8.4, 4.1$  Hz, 1H), 7.84 (d,  $J = 7.1$  Hz, 1H), 7.53 (t,  $J = 7.0$  Hz, 1H), 7.44 (td,  $J = 7.4, 2.8$  Hz, 1H), 7.39 (t,  $J = 7.5$  Hz, 1H).  $^{13}\text{C}$  NMR (126 MHz, Chloroform-*d*)  $\delta$  140.8, 139.3, 137.4, 137.2, 128.6, 128.2, 127.3, 126.0, 125.1, 123.9, 122.9, 120.6. IR (KBr,  $\text{cm}^{-1}$ ):  $\nu$  3032, 2904, 1554, 1439, 1413, 1365, 1189, 1045, 1001, 842, 788, 731, 705, 683, 657; GC-MS (EI): calcd. for  $\text{C}_{12}\text{H}_7\text{BrSe}$  [ $\text{M}^+$ ] 309.9; found 310.0.

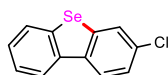

### 3-Chlorodibenzo[*b,d*]selenophene (**9c**)

Purification by PTLC ( $R_f = 0.32$  in petroleum ether) afforded **9c** as a yellow solid (46.8 mg, 88% yield). Mp = 53-55.5°C.  $^1\text{H}$  NMR (400 MHz, Chloroform-*d*)  $\delta$  8.08 (dd,  $J = 7.8, 1.3$  Hz, 1H), 8.02 (d,  $J = 8.5$  Hz, 1H), 7.90 – 7.81 (m, 2H), 7.47 (td,  $J = 7.6, 1.2$  Hz, 1H), 7.45 – 7.38 (m, 2H).  $^{13}\text{C}$  NMR (101 MHz, Chloroform-*d*)  $\delta$  140.4, 139.3, 137.4, 136.8, 132.7, 127.1, 126.1, 125.7, 125.5, 125.1, 123.5, 122.9. IR (KBr,  $\text{cm}^{-1}$ ):  $\nu$  3067, 2957, 2865, 1589, 1466, 1445, 1408, 1275, 1242, 1112, 1055, 841, 803, 776, 738; GC-MS (EI): calcd. for  $\text{C}_{12}\text{H}_7\text{ClSe}$  [ $\text{M}^+$ ] 265.9; found 266.0.

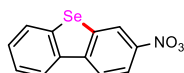

### 3-Nitrodibenzo[*b,d*]selenophene (**10c**)

Purification by PTLC ( $R_f = 0.32$  in petroleum ether) afforded **10c** as a yellow solid (47.5 mg, 86% yield). Mp = 140-142°C.  $^1\text{H}$  NMR (400 MHz, Chloroform-*d*)  $\delta$  8.77 (d,  $J = 2.1$  Hz, 1H), 8.31 (dd,  $J = 8.8, 2.0$  Hz, 1H), 8.20 (d,  $J = 8.1$  Hz, 2H), 7.94 (d,  $J = 7.1$  Hz, 1H), 7.59 – 7.49 (m, 2H).  $^{13}\text{C}$  NMR (101 MHz, Chloroform-*d*)  $\delta$  146.1, 143.4, 141.8, 139.5, 136.3, 128.7, 126.4, 125.6, 124.3, 122.9, 121.9, 120.2. IR (KBr,  $\text{cm}^{-1}$ ):  $\nu$  3089, 2976, 1679, 1493, 1486, 1467, 1255, 1263, 1134, 1069, 853, 783, 705; GC-MS (EI): calcd. for  $\text{C}_{12}\text{H}_7\text{NO}_2\text{Se}$  [ $\text{M}^+$ ] 276.9; found 277.0.

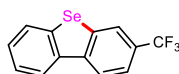

### 3-(Trifluoromethyl)dibenzo[*b,d*]selenophene (**11c**)

Purification by PTLC ( $R_f = 0.28$  in petroleum ether) afforded **11c** as a yellow solid (52.0 mg, 87% yield). Mp = 74.2-76°C.  $^1\text{H}$  NMR (400 MHz, Chloroform-*d*)  $\delta$  8.15 (s, 3H), 7.91 (d,  $J = 7.7$  Hz, 1H), 7.69 (d,  $J = 8.3$  Hz, 1H), 7.48 (t,  $J = 9.0$  Hz, 2H).  $^{13}\text{C}$  NMR (101 MHz, Chloroform-*d*)  $\delta$  141.1, 140.4, 139.4, 137.0, 128.7 (q,  $J = 32.3$  Hz), 128.0, 126.2, 125.6, 125.3, 124.1 (d,  $J = 233.6$  Hz), 123.2 (q,  $J = 4.1$  Hz), 122.9, 121.7 (q,  $J = 3.6$  Hz). IR (KBr,  $\text{cm}^{-1}$ ):  $\nu$  3376, 2997, 1366, 1275, 1189, 1145, 1098, 1067, 901, 843, 758, 719; GC-MS (EI): calcd. for  $\text{C}_{13}\text{H}_7\text{F}_3\text{Se}$  [ $\text{M}^+$ ] 299.9; found 300.0.

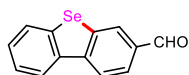

### Dibenzo[*b,d*]selenophene-3-carbaldehyde (**12c**)

Purification by PTLC ( $R_f = 0.36$  in petroleum ether/EtOAc/CH<sub>2</sub>Cl<sub>2</sub> = 15:1:1) afforded **12c** as a yellow solid (41.5 mg, 80% yield). Mp = 103-105°C. <sup>1</sup>H NMR (400 MHz, Chloroform-*d*) δ 10.05 (s, 1H), 8.34 (d,  $J = 1.5$  Hz, 1H), 8.19 (d,  $J = 8.2$  Hz, 1H), 8.15 (dd,  $J = 7.4, 1.9$  Hz, 1H), 7.91 (dd,  $J = 8.1, 1.5$  Hz, 1H), 7.87 (dd,  $J = 6.8, 1.2$  Hz, 1H), 7.43 (ddd,  $J = 9.1, 7.4, 1.5$  Hz, 2H). <sup>13</sup>C NMR (101 MHz, Chloroform-*d*) δ 190.5, 142.3, 140.4, 138.7, 136.1, 133.7, 127.4, 127.3, 125.3, 124.8, 124.3, 123.0, 122.2. IR (KBr, cm<sup>-1</sup>): ν 3205, 2955, 1768, 1597, 1542, 1475, 1423, 1367, 1256, 1021, 822, 775, 734; GC-MS (EI): calcd. for C<sub>13</sub>H<sub>8</sub>OSe [ $M^+$ ] 259.9; found 260.0.

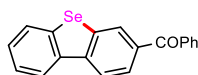

### Dibenzo[*b,d*]selenophen-3-yl(phenyl)methanone (**13c**)

Purification by PTLC ( $R_f = 0.32$  in petroleum ether) afforded **13c** as a yellow solid (54.9 mg, 82% yield). Mp = 123-125°C. <sup>1</sup>H NMR (400 MHz, Chloroform-*d*) δ 8.34 (d,  $J = 1.5$  Hz, 1H), 8.21 (dd,  $J = 7.7, 1.8$  Hz, 2H), 7.93 (dd,  $J = 8.2, 1.5$  Hz, 2H), 7.87 – 7.84 (m, 2H), 7.65 – 7.60 (m, 1H), 7.55 – 7.50 (m, 3H), 7.49 – 7.44 (m, 1H). <sup>13</sup>C NMR (101 MHz, Chloroform-*d*) δ 196.1, 141.7, 141.0, 139.1, 137.8, 137.3, 135.7, 132.5, 130.1, 128.4, 128.0, 126.8, 126.3, 125.2, 123.8, 122.5. IR (KBr, cm<sup>-1</sup>): ν 3205, 3015, 1778, 1536, 1513, 1443, 1417, 1331, 1213, 1075, 863, 734, 702; GC-MS (EI): calcd. for C<sub>19</sub>H<sub>12</sub>OSe [ $M^+$ ] 336.0; found 336.1.

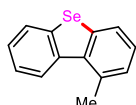

### 1-Methyldibenzo[*b,d*]selenophene (**15c**)

Purification by PTLC ( $R_f = 0.48$  in petroleum ether) afforded **15c** as a yellow solid (42.1 mg, 86% yield). Mp = 79.8-81.6°C. <sup>1</sup>H NMR (400 MHz, Chloroform-*d*) δ 8.39 (d,  $J = 8.2$  Hz, 1H), 7.93 (d,  $J = 7.8$  Hz, 1H), 7.78 (dd,  $J = 7.2, 1.8$  Hz, 1H), 7.47 (td,  $J = 8.1, 1.2$  Hz, 1H), 7.38 (td,  $J = 8.1, 1.2$  Hz, 1H), 7.29 (td,  $J = 8.1, 1.2$  Hz, 1H), 7.24 (s, 1H), 2.92 (dd,  $J = 7.2, 1.8$  Hz, 3H). <sup>13</sup>C NMR (101 MHz, Chloroform-*d*) δ 139.9, 139.6, 139.6, 136.4, 136.2, 128.1, 126.8, 126.1, 126.1, 125.9, 124.6, 123.9, 23.5. IR (KBr, cm<sup>-1</sup>): ν 3023, 2901, 2827, 1537, 1487, 1175, 1067, 1012, 878, 787, 745; GC-MS (EI): calcd. for C<sub>13</sub>H<sub>10</sub>Se [ $M^+$ ] 245.9; found 246.0.

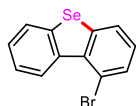

### 1-Bromodibenzo[*b,d*]selenophene (**16c**)

Purification by PTLC ( $R_f = 0.45$  in petroleum ether) afforded **16c** as a yellow solid (52.7 mg, 85% yield). Mp = 91-93°C. <sup>1</sup>H NMR (400 MHz, Chloroform-*d*) δ 9.31 (dd,  $J = 8.2, 1.7$  Hz, 1H), 7.91 (dd,  $J = 7.9, 1.2$  Hz, 1H), 7.87 (dd,  $J = 7.8, 1.0$  Hz, 1H), 7.71 (dd,  $J = 7.8, 1.0$  Hz, 1H), 7.52 (td,  $J = 8.3, 7.8, 1.4$  Hz, 1H), 7.46 (td,  $J = 7.5, 1.4$  Hz, 1H), 7.20 (t,  $J = 7.8$  Hz, 1H). <sup>13</sup>C NMR (101 MHz, Chloroform-*d*) δ 141.8, 139.9, 137.8, 135.1, 131.2, 127.4, 127.2, 126.7, 125.8, 125.2, 124.3, 119.6. IR (KBr, cm<sup>-1</sup>): ν 3022,

3014, 1644, 1443, 1423, 1376, 1207, 1063, 1042, 863, 775, 751, 724, 698, 663; GC-MS (EI): calcd. for C<sub>12</sub>H<sub>7</sub>BrSe [M<sup>+</sup>] 309.9; found 310.0.

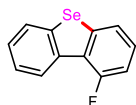

### 1-Fluorodibenzo[*b,d*]selenophene (17c)

Purification by PTLC ( $R_f = 0.26$  in petroleum ether) afforded **17c** as a white crystal (45.8 mg, 92% yield). Mp = 70-72°C. <sup>1</sup>H NMR (400 MHz, Chloroform-*d*) δ 8.54 – 8.41 (m, 1H), 7.93 – 7.86 (m, 1H), 7.66 (dd,  $J = 7.9, 0.9$  Hz, 1H), 7.55 – 7.48 (m, 1H), 7.46 – 7.40 (m, 1H), 7.34 (td,  $J = 8.0, 5.0$  Hz, 1H), 7.17 (dddd,  $J = 11.6, 8.1, 2.3, 1.2$  Hz, 1H). <sup>13</sup>C NMR (101 MHz, Chloroform-*d*) δ 160.7 (d,  $J = 252.4$  Hz), 141.1 (d,  $J = 3.4$  Hz), 138.8, 136.1 (d,  $J = 4.7$  Hz), 128.8 (d,  $J = 59.7$  Hz), 127.3 (d,  $J = 7.9$  Hz), 127.0 (d,  $J = 12.6$  Hz), 126.9, 125.6, 125.3, 121.7 (d,  $J = 3.9$  Hz), 111.6 (d,  $J = 20.9$  Hz). IR (KBr, cm<sup>-1</sup>): ν 3043, 2953, 1667, 1574, 1412, 1363, 1237, 1042, 1017, 834, 763, 734, 712, 683, 647; GC-MS (EI): calcd. for C<sub>12</sub>H<sub>7</sub>FSe [M<sup>+</sup>] 249.9; found 250.0.

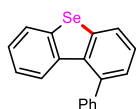

### 1-Phenyldibenzo[*b,d*]selenophene (18c)

Purification by PTLC ( $R_f = 0.46$  in petroleum ether) afforded **18c** as a yellow oily liquid (54.7 mg, 89% yield). <sup>1</sup>H NMR (400 MHz, Chloroform-*d*) δ 7.88 (dt,  $J = 7.9, 1.2$  Hz, 1H), 7.82 (dd,  $J = 8.0, 1.2$  Hz, 1H), 7.48 (dt,  $J = 4.6, 2.6$  Hz, 3H), 7.40 (ddd,  $J = 5.2, 3.2, 1.8$  Hz, 2H), 7.36 (td,  $J = 7.3, 6.8, 1.2$  Hz, 1H), 7.25 – 7.20 (m, 2H), 7.02 (td,  $J = 3.3, 1.4$  Hz, 2H). <sup>13</sup>C NMR (101 MHz, Chloroform-*d*) δ 141.9, 140.9, 140.1, 139.6, 138.4, 135.3, 129.1, 128.8, 127.7, 126.8, 126.3, 125.9, 125.7, 125.2, 124.2. IR (KBr, cm<sup>-1</sup>): ν 3035, 2942, 2845, 1466, 1435, 1423, 1353, 1226, 1063, 998, 795, 718, 667; GC-MS (EI): calcd. for C<sub>18</sub>H<sub>12</sub>Se [M<sup>+</sup>] 308.0; found 308.1.

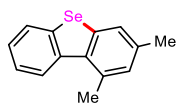

### 1,3-Dimethyldibenzo[*b,d*]selenophene (19c)

Purification by PTLC ( $R_f = 0.42$  in petroleum ether) afforded **19c** as a yellow solid (47.7 mg, 92% yield). Mp = 111.7-114°C. <sup>1</sup>H NMR (400 MHz, Chloroform-*d*) δ 8.32 (d,  $J = 8.1$  Hz, 1H), 7.89 (dd,  $J = 7.8, 1.2$  Hz, 1H), 7.57 (s, 1H), 7.42 (td,  $J = 7.5, 1.2$  Hz, 1H), 7.34 (td,  $J = 7.5, 1.2$  Hz, 1H), 7.06 (s, 1H), 2.86 (s, 3H), 2.43 (s, 3H). <sup>13</sup>C NMR (101 MHz, Chloroform-*d*) δ 140.2, 139.6, 139.2, 136.2, 135.7, 134.0, 129.6, 126.3, 126.1, 125.5, 124.6, 124.0, 23.3, 21.2. IR (KBr, cm<sup>-1</sup>): ν 3105, 2956, 2974, 1783, 1647, 1467, 1434, 1256, 1086, 1061, 875, 782, 734, 679; GC-MS (EI): calcd. for C<sub>14</sub>H<sub>12</sub>Se [M<sup>+</sup>] 260.0; found 260.1.



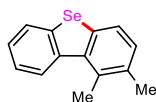

### 1,2-Dimethyldibenzo[*b,d*]selenophene (20c)

Purification by PTLC ( $R_f = 0.50$  in petroleum ether) afforded **20c** as a yellow solid (85% yield). Mp = 48-50°C.  $^1\text{H}$  NMR (400 MHz, Chloroform-*d*)  $\delta$  8.45 (d,  $J = 8.2$  Hz, 1H), 7.91 (dd,  $J = 7.8, 1.3$  Hz, 1H), 7.66 (d,  $J = 8.0$  Hz, 1H), 7.46 (td,  $J = 8.0, 1.2$  Hz, 1H), 7.37 (td,  $J = 8.0, 1.2$  Hz, 1H), 7.22 (d,  $J = 8.0$  Hz, 1H), 2.84 (s, 3H), 2.49 (s, 3H).  $^{13}\text{C}$  NMR (101 MHz, Chloroform-*d*)  $\delta$  139.9, 139.7, 137.2, 136.8, 134.8, 133.6, 128.8, 127.2, 126.2, 125.7, 124.4, 123.2, 20.9, 18.2. IR (KBr,  $\text{cm}^{-1}$ ):  $\nu$  3063, 2947, 2863, 1667, 1634, 1453, 1423, 1274, 1073, 1035, 834, 763, 742, 693, 653; GC-MS (EI): calcd. for  $\text{C}_{14}\text{H}_{12}\text{Se}$  [ $\text{M}^+$ ] 260.0; found 260.1.

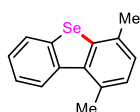

### 1,4-Dimethyldibenzo[*b,d*]selenophene (21c)

Purification by PTLC ( $R_f = 0.42$  in petroleum ether) afforded **21c** as a yellow oily liquid (37.8 mg, 73% yield).  $^1\text{H}$  NMR (400 MHz, Chloroform-*d*)  $\delta$  8.41 (d,  $J = 8.2$  Hz, 1H), 7.96 (d,  $J = 7.8$  Hz, 1H), 7.47 (td,  $J = 8.3, 7.8, 1.5$  Hz, 1H), 7.38 (td,  $J = 8.3, 7.8, 2\text{H}$ ), 7.20 (d,  $J = 7.4$  Hz, 1H), 7.12 (d,  $J = 7.4$  Hz, 1H), 2.90 (s, 3H), 2.54 (s, 3H).  $^{13}\text{C}$  NMR (101 MHz, Chloroform-*d*)  $\delta$  141.3, 140.4, 139.2, 133.4, 133.0, 132.2, 128.6, 126.6, 126.1, 126.1, 125.7, 124.6, 23.1, 22.4. IR (KBr,  $\text{cm}^{-1}$ ):  $\nu$  3045, 2976, 2967, 1756, 1683, 1461, 1298, 1067, 1045, 867, 796, 634; GC-MS (EI): calcd. for  $\text{C}_{14}\text{H}_{12}\text{Se}$  [ $\text{M}^+$ ] 260.0; found 260.1.

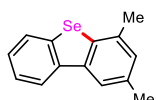

### 2,4-Dimethyldibenzo[*b,d*]selenophene (22c)

Purification by PTLC ( $R_f = 0.52$  in petroleum ether) afforded **22c** as a yellow solid (45.1 mg, 87% yield). Mp = 43-45.5°C.  $^1\text{H}$  NMR (400 MHz, Chloroform-*d*)  $\delta$  8.08 (dd,  $J = 7.9, 1.3$  Hz, 1H), 7.88 (d,  $J = 7.8$  Hz, 1H), 7.78 (s, 1H), 7.43 (td,  $J = 7.6, 1.2$  Hz, 1H), 7.35 (td,  $J = 7.5, 1.4$  Hz, 1H), 7.07 (s, 1H), 2.51 (s, 3H), 2.48 (s, 3H).  $^{13}\text{C}$  NMR (101 MHz, Chloroform-*d*)  $\delta$  139.3, 138.9, 138.2, 137.2, 135.1, 134.5, 128.5, 126.5, 126.1, 124.7, 123.0, 120.6, 22.4, 21.3. IR (KBr,  $\text{cm}^{-1}$ ):  $\nu$  3096, 2913, 1775, 1668, 1434, 1413, 1243, 1075, 1047, 886, 774, 762, 663; GC-MS (EI): calcd. for  $\text{C}_{14}\text{H}_{12}\text{Se}$  [ $\text{M}^+$ ] 260.0; found 260.1.

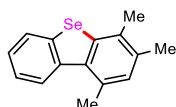

### 1,3,4-Trimethyldibenzo[*b,d*]selenophene (23c)

Purification by PTLC ( $R_f = 0.43$  in petroleum ether) afforded **23c** as a yellow oily liquid

(45.3 mg, 83% yield).  $^1\text{H}$  NMR (400 MHz, Chloroform-*d*)  $\delta$  8.33 (d,  $J = 8.2$  Hz, 1H), 7.91 (dd,  $J = 7.8, 1.3$  Hz, 1H), 7.44 (ddd,  $J = 8.3, 7.1, 1.3$  Hz, 1H), 7.34 (td,  $J = 7.5, 1.3$  Hz, 1H), 7.07 (s, 1H), 2.84 (s, 3H), 2.45 (s, 3H), 2.39 (s, 3H).  $^{13}\text{C}$  NMR (101 MHz, Chloroform-*d*)  $\delta$  140.8, 139.1, 134.2, 133.7, 133.1, 131.0, 130.2, 126.2, 125.9, 125.3, 124.6, 22.9, 19.9, 19.7. IR (KBr,  $\text{cm}^{-1}$ ):  $\nu$  3024, 2965, 2835, 1634, 1623, 1565, 1423, 1412, 1283, 1083, 1046, 883, 763, 721, 678, 613; GC-MS (EI): calcd. for  $\text{C}_{15}\text{H}_{14}\text{Se}$  [ $\text{M}^+$ ] 274.0; found 274.1.

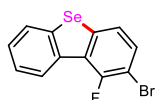

### 2-Bromo-1-fluorodibenzo[*b,d*]selenophene (24c)

Purification by PTLC ( $R_f = 0.22$  in petroleum ether) afforded **24c** as a yellow solid (42.6 mg, 65% yield).  $\text{Mp} = 83\text{--}84.3^\circ\text{C}$ .  $^1\text{H}$  NMR (400 MHz, Chloroform-*d*)  $\delta$  8.44 (dd,  $J = 8.1, 1.3$  Hz, 1H), 7.88 (dd,  $J = 7.8, 1.2$  Hz, 1H), 7.55 – 7.48 (m, 3H), 7.44 (td,  $J = 7.6, 1.4$  Hz, 1H).  $^{13}\text{C}$  NMR (101 MHz, Chloroform-*d*)  $\delta$  156.8 (d,  $J = 252.9$  Hz), 140.0 (d,  $J = 4.6$  Hz), 139.4, 135.4 (d,  $J = 5.4$  Hz), 130.6, 127.9 (d,  $J = 15.3$  Hz), 127.4 (d,  $J = 1.2$  Hz), 127.1 (d,  $J = 13$  Hz), 125.7, 125.5, 122.6 (d,  $J = 4.6$  Hz), 105.1 (d,  $J = 20.8$  Hz). IR (KBr,  $\text{cm}^{-1}$ ):  $\nu$  3168, 3023, 1631, 1525, 1474, 1364, 1248, 1067, 1028, 867, 823, 731, 711, 623, 606; GC-MS (EI): calcd. for  $\text{C}_{12}\text{H}_6\text{FBrSe}$  [ $\text{M}^+$ ] 327.9; found 328.0.

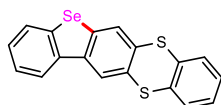

### Benzo[4,5]selenopheno[2,3-*b*]thianthrene (25c)

Purification by PTLC ( $R_f = 0.24$  in petroleum ether) afforded **25c** as a yellow solid (45.8 mg, 62% yield).  $\text{Mp} = 108.3\text{--}110^\circ\text{C}$ .  $^1\text{H}$  NMR (600 MHz, Chloroform-*d*)  $\delta$  9.52 (d,  $J = 8.4$  Hz, 1H), 7.91 (d,  $J = 7.9$  Hz, 1H), 7.79 (d,  $J = 8.1$  Hz, 1H), 7.69 (dd,  $J = 7.4, 1.7$  Hz, 1H), 7.61 – 7.54 (m, 3H), 7.45 (t,  $J = 7.5$  Hz, 1H), 7.33 – 7.27 (m, 2H).  $^{13}\text{C}$  NMR (151 MHz, Chloroform-*d*)  $\delta$  139.1, 138.9, 137.0, 136.4, 135.4, 134.0, 133.9, 132.5, 128.5, 127.6, 127.5, 127.3, 126.8, 125.9, 125.8, 124.9, 124.0, 123.8. IR (KBr,  $\text{cm}^{-1}$ ):  $\nu$  3035, 3007, 1645, 1423, 1331, 1067, 898, 764, 725, 606; GC-MS (EI): calcd. for  $\text{C}_{18}\text{H}_{10}\text{S}_2\text{Se}$  [ $\text{M}^+$ ] 369.9; found 370.0.

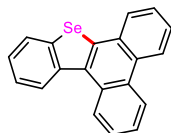

### Benzo[*b*]phenanthro[9,10-*d*]selenophene (26c)

Purification by PTLC ( $R_f = 0.26$  in petroleum ether) afforded **26c** as a yellow solid (60.2 mg, 91% yield).  $\text{Mp} = 107.6\text{--}110^\circ\text{C}$ .  $^1\text{H}$  NMR (400 MHz, Chloroform-*d*)  $\delta$  9.06 (dd,  $J = 8.3, 1.4$  Hz, 1H), 8.89 – 8.80 (m, 2H), 8.72 (dd,  $J = 8.3, 1.4$  Hz, 1H), 8.07 (dd,  $J = 7.9, 1.4$  Hz, 1H), 8.00 (dd,  $J = 7.6, 1.6$  Hz, 1H), 7.79 – 7.63 (m, 4H), 7.61 – 7.57 (m, 1H), 7.44 (td,  $J = 7.5, 1.2$  Hz, 1H).  $^{13}\text{C}$  NMR (101 MHz, Chloroform-*d*)  $\delta$  141.5,

140.6, 139.9, 131.0, 130.7, 130.2, 130.1, 129.3, 127.5, 127.4, 127.2, 126.6, 126.3, 125.7, 125.4, 125.2, 124.2, 123.9, 123.3. IR (KBr,  $\text{cm}^{-1}$ ):  $\nu$  3035, 2873, 2869, 1454, 1422, 1407, 1376, 1254, 1031, 972, 714, 656, 623; GC-MS (EI): calcd. for  $\text{C}_{20}\text{H}_{12}\text{Se}$  [ $\text{M}^+$ ] 332.0; found 332.1.

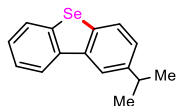

### 2-Isopropyldibenzo[*b,d*]selenophene (27c)

Purification by PTLC ( $R_f = 0.56$  in petroleum ether) afforded **27c** as a yellow oily liquid (46.4 mg, 85% yield).  $^1\text{H}$  NMR (400 MHz, Chloroform-*d*)  $\delta$  8.15 (d,  $J = 8.0$  Hz, 1H), 8.00 (s, 1H), 7.88 (d,  $J = 8.0$  Hz, 1H), 7.81 (d,  $J = 8.2$  Hz, 1H), 7.46 (t,  $J = 7.5$  Hz, 1H), 7.38 (t,  $J = 7.5$  Hz, 1H), 7.30 (d,  $J = 8.2$  Hz, 1H), 3.08 (p,  $J = 7.0$  Hz, 1H), 1.36 (d,  $J = 6.9$  Hz, 6H).  $^{13}\text{C}$  NMR (101 MHz, Chloroform-*d*)  $\delta$  144.8, 138.6, 137.3, 135.3, 125.6, 125.1, 124.9, 124.8, 123.7, 121.7, 119.5, 33.2, 23.3. GC-MS (EI): calcd. for  $\text{C}_{15}\text{H}_{14}\text{Se}$  [ $\text{M}^+$ ] 274.0; found 274.1.

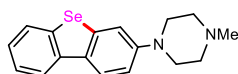

### 1-(Dibenzo[*b,d*]selenophen-3-yl)-4-methylpiperazine (28c)

Purification by PTLC ( $R_f = 0.28$  in petroleum ether/EtOAc = 5:1) afforded **28c** as a brown solid (36.2 mg, 55% yield). Mp = 98-91°C.  $^1\text{H}$  NMR (400 MHz, Chloroform-*d*)  $\delta$  7.97 (dd,  $J = 8.4, 4.8$  Hz, 2H), 7.81 (d,  $J = 7.9$  Hz, 1H), 7.40 (t,  $J = 7.5$  Hz, 1H), 7.36 (d,  $J = 2.3$  Hz, 1H), 7.29 (t,  $J = 7.5$  Hz, 1H), 7.08 (dd,  $J = 8.8, 2.3$  Hz, 1H), 3.32 (t,  $J = 5.0$  Hz, 4H), 2.63 (t,  $J = 5.0$  Hz, 4H), 2.38 (s, 3H).  $^{13}\text{C}$  NMR (101 MHz, Chloroform-*d*)  $\delta$  150.6, 140.9, 138.5, 138.2, 130.7, 125.9, 125.5, 124.8, 123.1, 121.9, 114.7, 111.8, 55.1, 49.2, 46.1. GC-MS (EI): calcd. for  $\text{C}_{17}\text{H}_{18}\text{N}_2\text{Se}$  [ $\text{M}^+$ ] 330.0; found 330.1.

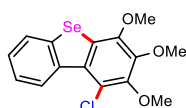

### 1-Chloro-2,3,4-trimethoxydibenzo[*b,d*]selenophene (29c)

Purification by PTLC ( $R_f = 0.30$  in petroleum ether) afforded **29c** as a yellow oily liquid (45.9 mg, 62% yield).  $^1\text{H}$  NMR (400 MHz, Chloroform-*d*)  $\delta$  9.06 (d,  $J = 8.3$  Hz, 1H), 7.87 (d,  $J = 7.8$  Hz, 1H), 7.47 (t,  $J = 7.3$  Hz, 1H), 7.39 (t,  $J = 7.1$  Hz, 1H), 4.08 (s, 3H), 4.03 (s, 3H), 3.98 (s, 3H).  $^{13}\text{C}$  NMR (101 MHz, Chloroform-*d*)  $\delta$  149.3, 147.5, 144.2, 139.5, 138.5, 130.1, 129.9, 127.1, 126.6, 125.9, 124.7, 120.6, 61.5, 61.3, 60.8. HR-ESI-MS ( $m/z$ ): calcd. for  $\text{C}_{13}\text{H}_{16}\text{O}_3\text{SeCl}$  [ $\text{M}+\text{H}$ ] $^+$  356.9791, found 356.9788.

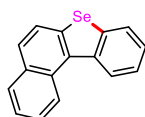

### Benzo[*b*]naphtho[1,2-*d*]selenophene (32c)

Purification by PTLC ( $R_f = 0.32$  in petroleum ether) afforded **32c** as a yellow solid

(51.7 mg, 92% yield). Mp = 93-95°C. <sup>1</sup>H NMR (400 MHz, Chloroform-*d*) δ 9.05 (dd, *J* = 8.5, 1.0 Hz, 1H), 8.91 (dd, *J* = 8.3, 0.7 Hz, 1H), 8.05 (dd, *J* = 7.6, 1.5 Hz, 1H), 8.01 (dd, *J* = 8.1, 1.5 Hz, 1H), 7.96 (d, *J* = 8.6 Hz, 1H), 7.82 (d, *J* = 8.5 Hz, 1H), 7.72 (ddd, *J* = 8.5, 6.9, 1.5 Hz, 1H), 7.59 (tdd, *J* = 7.9, 7.1, 1.2 Hz, 2H), 7.44 (ddd, *J* = 8.2, 7.2, 1.2 Hz, 1H). <sup>13</sup>C NMR (101 MHz, Chloroform-*d*) δ 140.4, 139.9, 139.6, 132.4, 131.7, 131.7, 129.5, 127.7, 127.0, 126.6, 126.5, 125.4, 125.1, 124.9, 123.9, 123.3. GC-MS (EI): calcd. for C<sub>16</sub>H<sub>10</sub>Se [M<sup>+</sup>] 281.9; found 282.0.

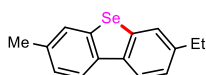

### 3-Ethyl-7-methyldibenzoselenophene (35c)

Purification by PTLC (*R<sub>f</sub>* = 0.54 in petroleum ether) afforded **35c** as a yellow oily liquid (48.6 mg, 89% yield). <sup>1</sup>H NMR (400 MHz, Chloroform-*d*) δ 7.97 (t, *J* = 8.4 Hz, 2H), 7.68 (dd, *J* = 9.1, 1.2 Hz, 2H), 7.32 – 7.21 (m, 2H), 2.77 (q, *J* = 7.6 Hz, 2H), 2.48 (s, 3H), 1.32 (t, *J* = 7.6 Hz, 3H). <sup>13</sup>C NMR (101 MHz, Chloroform-*d*) δ 143.0, 139.1, 139.1, 136.5, 136.1, 135.9, 126.2, 126.2, 125.1, 125.0, 122.3, 122.2, 29.0, 21.6, 15.8. GC-MS (EI): calcd. for C<sub>15</sub>H<sub>14</sub>Se [M<sup>+</sup>] 274.0; found 274.1.

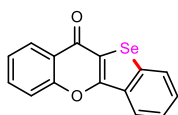

### 11H-Benzo[4,5]selenopheno[3,2-*b*]chromen-11-one (1e)

Purification by PTLC (*R<sub>f</sub>* = 0.35 in petroleum ether/EtOAc = 10:1) afforded **1e** as a yellow solid (42.4 mg, 71% yield). Mp = 197-201°C. <sup>1</sup>H NMR (600 MHz, Chloroform-*d*) δ 8.38 (dd, *J* = 8.0, 1.6 Hz, 1H), 8.27 – 8.19 (m, 1H), 8.02 – 7.90 (m, 1H), 7.78 (td, *J* = 7.8, 6.9, 1.7 Hz, 1H), 7.69 (d, *J* = 8.4 Hz, 1H), 7.60 – 7.54 (m, 2H), 7.51 (t, *J* = 7.5 Hz, 1H). <sup>13</sup>C NMR (151 MHz, Chloroform-*d*) δ 174.6, 156.2, 155.6, 139.9, 133.9, 132.2, 129.4, 126.9, 126.0, 125.5, 125.2, 124.4, 122.5, 121.6, 118.1. IR (KBr, cm<sup>-1</sup>): ν 3887, 3843, 3836, 3614, 3573, 3405, 2936, 2814, 1561, 1505, 1489, 1278, 1254, 1146, 913, 823, 804, 743; HR-ESI-MS (*m/z*): calcd. for C<sub>15</sub>H<sub>8</sub>O<sub>2</sub>Se [M+H]<sup>+</sup> 300.9762, found 300.9758.

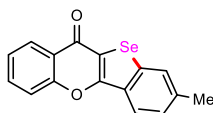

### 8-Methyl-11H-benzo[4,5]selenopheno[3,2-*b*]chromen-11-one (2e)

Purification by PTLC (*R<sub>f</sub>* = 0.38 in petroleum ether/EtOAc = 10:1) afforded **2e** as a yellow solid (42.5 mg, 68% yield). Mp = 158-160°C. <sup>1</sup>H NMR (400 MHz, Chloroform-*d*) δ 8.33 (dd, *J* = 8.0, 1.7 Hz, 1H), 8.02 (d, *J* = 8.2 Hz, 1H), 7.74 – 7.69 (m, 2H), 7.61 (dd, *J* = 8.4, 1.1 Hz, 1H), 7.45 (td, *J* = 7.5, 7.0, 1.1 Hz, 1H), 7.30 (dd, *J* = 8.1, 1.4 Hz, 1H), 2.47 (s, 3H). <sup>13</sup>C NMR (101 MHz, Chloroform-*d*) δ 174.4, 156.1, 155.6, 140.3, 140.1, 133.6, 129.7, 127.1, 126.8, 125.9, 125.0, 123.9, 122.4, 120.6, 118.0, 21.9. IR (KBr, cm<sup>-1</sup>): ν 3943, 3867, 3624, 3589, 3418, 2923, 2856, 1513, 1487, 1289, 1256, 1165, 923, 804; HR-ESI-MS (*m/z*): calcd. for C<sub>16</sub>H<sub>10</sub>O<sub>2</sub>Se [M+H]<sup>+</sup> 314.9919, found

314.9920.

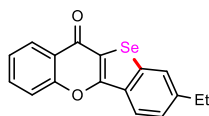

**8-Ethyl-11H-benzo[4,5]selenopheno[3,2-b]chromen-11-one (3e)**

Purification by PTLC ( $R_f = 0.42$  in petroleum ether/EtOAc = 10:1) afforded **3e** as a yellow solid (40.6 mg, 62% yield). Mp = 117.5-120°C.  $^1\text{H}$  NMR (400 MHz, Chloroform-*d*)  $\delta$  8.34 (dd,  $J = 7.9, 1.7$  Hz, 1H), 8.08 (d,  $J = 8.2$  Hz, 1H), 7.80 – 7.68 (m, 2H), 7.63 (d,  $J = 8.4$  Hz, 1H), 7.46 (t,  $J = 7.5$  Hz, 1H), 7.39 – 7.33 (m, 1H), 2.79 (q,  $J = 7.6$  Hz, 2H), 1.32 (t,  $J = 7.6$  Hz, 3H).  $^{13}\text{C}$  NMR (101 MHz, Chloroform-*d*)  $\delta$  174.4, 156.1, 155.7, 146.6, 140.3, 133.6, 130.0, 126.1, 125.9, 125.6, 125.0, 124.1, 122.5, 120.7, 118.0, 29.3, 15.4. IR (KBr,  $\text{cm}^{-1}$ ):  $\nu$  3916, 3863, 3842, 3605, 3475, 3447, 2979, 2964, 2891, 1675, 1586, 1558, 1365, 1234, 1227, 1168, 984, 874, 725, 683; HR-ESI-MS ( $m/z$ ): calcd. for  $\text{C}_{17}\text{H}_{12}\text{O}_2\text{Se}$   $[\text{M}+\text{H}]^+$  329.0075, found 329.0073.

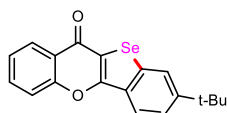

**8-(Tert-butyl)-11H-benzo[4,5]selenopheno[3,2-b]chromen-11-one (4e)**

Purification by PTLC ( $R_f = 0.36$  in petroleum ether/EtOAc = 10:1) afforded **4e** as a yellow solid (49.7 mg, 70% yield). Mp = 111-113°C.  $^1\text{H}$  NMR (400 MHz, Chloroform-*d*)  $\delta$  8.36 (dd,  $J = 8.0, 1.7$  Hz, 1H), 8.12 (d,  $J = 8.5$  Hz, 1H), 7.96 (d,  $J = 1.6$  Hz, 1H), 7.75 (ddd,  $J = 8.6, 7.0, 1.7$  Hz, 1H), 7.66 (dd,  $J = 8.5, 1.1$  Hz, 1H), 7.60 (dd,  $J = 8.5, 1.7$  Hz, 1H), 7.48 (td,  $J = 8.1, 7.5, 1.2$  Hz, 1H), 1.42 (s, 9H).  $^{13}\text{C}$  NMR (101 MHz, Chloroform-*d*)  $\delta$  174.4, 156.2, 155.7, 153.5, 140.3, 133.6, 129.7, 126.0, 125.0, 123.9, 123.7, 123.2, 122.5, 121.0, 118.0, 35.5, 31.3. IR (KBr,  $\text{cm}^{-1}$ ):  $\nu$  3912, 3883, 3827, 3646, 3602, 3522, 3487, 3434, 2964, 2913, 2864, 1644, 1608, 1561, 1517, 1463, 1306, 1264, 1217, 1110, 937, 874, 822, 756, 694; HR-ESI-MS ( $m/z$ ): calcd. for  $\text{C}_{19}\text{H}_{16}\text{O}_2\text{Se}$   $[\text{M}+\text{H}]^+$  357.0388, found 357.0387.

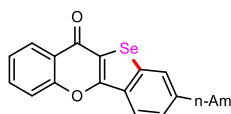

**8-Pentyl-11H-benzo[4,5]selenopheno[3,2-b]chromen-11-one (5e)**

Purification by PTLC ( $R_f = 0.32$  in petroleum ether/EtOAc = 10:1) afforded **5e** as a yellow solid (26.6 mg, 36% yield). Mp = 83.7-85°C.  $^1\text{H}$  NMR (400 MHz, Chloroform-*d*)  $\delta$  8.37 (dd,  $J = 8.0, 1.7$  Hz, 1H), 8.12 (d,  $J = 8.1$  Hz, 1H), 7.79 – 7.71 (m, 2H), 7.67 (d,  $J = 8.4$  Hz, 1H), 7.49 (t,  $J = 7.5$  Hz, 1H), 7.37 (d,  $J = 8.2$  Hz, 1H), 2.76 (t,  $J = 7.8$  Hz, 2H), 1.71 (p,  $J = 7.4$  Hz, 2H), 1.39 – 1.33 (m, 4H), 0.91 (t,  $J = 6.6$  Hz, 3H).  $^{13}\text{C}$  NMR (101 MHz, Chloroform-*d*)  $\delta$  174.5, 156.2, 155.8, 145.4, 140.2, 133.6, 130.0, 126.6, 126.3, 126.0, 125.0, 124.1, 122.5, 120.7, 118.0, 36.3, 31.5, 31.0, 22.5, 14.0. IR (KBr,  $\text{cm}^{-1}$ ):  $\nu$  3954, 3889, 3863, 3647, 3534, 3487, 2968, 2926, 2867, 1658, 1667, 1589, 1543, 14755, 1367, 1258, 1252, 1103, 934, 862, 852, 769, 692; HR-ESI-MS ( $m/z$ ):

calcd. for C<sub>20</sub>H<sub>18</sub>O<sub>2</sub>Se [M+H]<sup>+</sup> 371.0545, found 371.0547.

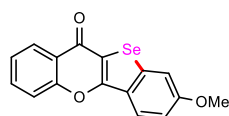

### 8-Methoxy-11H-benzo[4,5]selenopheno[3,2-b]chromen-11-one (6e)

Purification by PTLC ( $R_f = 0.42$  in petroleum ether/EtOAc = 10:1) afforded **6e** as a yellow solid (28.3 mg, 43% yield). Mp = 207.7-210°C. <sup>1</sup>H NMR (400 MHz, Chloroform-*d*)  $\delta$  8.36 (dd,  $J = 7.9, 1.7$  Hz, 1H), 8.09 (d,  $J = 8.8$  Hz, 1H), 7.74 (td,  $J = 7.8, 7.0, 1.7$  Hz, 1H), 7.64 (d,  $J = 8.4$  Hz, 1H), 7.48 (t,  $J = 7.5$  Hz, 1H), 7.42 (d,  $J = 2.3$  Hz, 1H), 7.13 (dd,  $J = 8.8, 2.3$  Hz, 1H), 3.93 (s, 3H). <sup>13</sup>C NMR (101 MHz, Chloroform-*d*)  $\delta$  174.1, 161.3, 156.1, 155.7, 142.0, 133.5, 125.9, 125.5, 125.2, 125.0, 122.5, 119.3, 117.9, 115.3, 109.5, 55.8. IR (KBr, cm<sup>-1</sup>):  $\nu$  3926, 3854, 3837, 3622, 3469, 2977, 2958, 2889, 1672, 1593, 1516, 1378, 1246, 1223, 1172, 965, 803, 726, 678; HR-ESI-MS ( $m/z$ ): calcd. for C<sub>16</sub>H<sub>10</sub>O<sub>3</sub>Se [M+H]<sup>+</sup> 330.9868, found 330.9867.

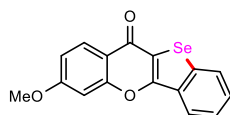

### 3-Methoxy-11H-benzo[4,5]selenopheno[3,2-b]chromen-11-one (7e)

Purification by PTLC ( $R_f = 0.38$  in petroleum ether/EtOAc = 10:1) afforded **7e** as a yellow solid (30.2 mg, 46% yield). Mp = 175.7-180°C. <sup>1</sup>H NMR (400 MHz, Chloroform-*d*)  $\delta$  8.24 (d,  $J = 9.3$  Hz, 1H), 8.18 – 8.09 (m, 1H), 7.97 – 7.88 (m, 1H), 7.53 – 7.49 (m, 2H), 7.03 (d,  $J = 8.1$  Hz, 2H), 3.95 (s, 3H). <sup>13</sup>C NMR (101 MHz, Chloroform-*d*)  $\delta$  173.9, 164.3, 158.0, 155.1, 139.6, 132.2, 129.1, 127.3, 126.8, 125.3, 124.1, 121.7, 116.4, 114.2, 100.5, 55.9. HR-ESI-MS ( $m/z$ ): calcd. for C<sub>16</sub>H<sub>10</sub>O<sub>3</sub>Se [M+H]<sup>+</sup> 330.9868, found 330.9865.

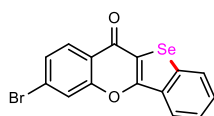

### 3-Bromo-11H-benzo[4,5]selenopheno[3,2-b]chromen-11-one (8e)

Purification by PTLC ( $R_f = 0.48$  in petroleum ether/EtOAc = 10:1) afforded **8e** as a yellow solid (39.3 mg, 52% yield). Mp = 95.5-98°C. <sup>1</sup>H NMR (400 MHz, Chloroform-*d*)  $\delta$  8.22 (d,  $J = 8.5$  Hz, 1H), 8.21 – 8.13 (m, 1H), 7.96 (dt,  $J = 7.4, 3.5$  Hz, 1H), 7.87 (s, 1H), 7.61 (dd,  $J = 8.5, 1.8$  Hz, 1H), 7.58 – 7.53 (m, 2H). <sup>13</sup>C NMR (101 MHz, Chloroform-*d*)  $\delta$  173.7, 156.2, 155.3, 140.1, 131.8, 129.6, 128.8, 128.0, 127.4, 126.9, 125.6, 124.3, 121.9, 121.3, 121.2. IR (KBr, cm<sup>-1</sup>):  $\nu$  3907, 3876, 3863, 3614, 3582, 3405, 2814, 1569, 1510, 1489, 1278, 1254, 1152, 913, 823, 757; HR-ESI-MS ( $m/z$ ): calcd. for C<sub>15</sub>H<sub>7</sub>O<sub>2</sub>SeBr [M+H]<sup>+</sup> 378.8867, found 378.8867.

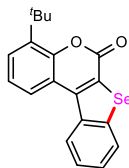

#### 4-(*Tert*-butyl)-6*H*-benzo[4,5]selenopheno[2,3-*c*]chromen-6-one (**9e**)

Purification by PTLC ( $R_f = 0.48$  in petroleum ether/EtOAc = 10:1) afforded **9e** as a yellow solid (37.6 mg, 53% yield). Mp = 68-70°C.  $^1\text{H}$  NMR (600 MHz, Chloroform-*d*)  $\delta$  8.74 (d,  $J = 8.2$  Hz, 1H), 8.48 (d,  $J = 8.0$  Hz, 1H), 8.08 (d,  $J = 7.9$  Hz, 1H), 7.64 – 7.58 (m, 2H), 7.57 (t,  $J = 7.5$  Hz, 1H), 7.39 (t,  $J = 7.8$  Hz, 1H), 1.59 (s, 9H).  $^{13}\text{C}$  NMR (151 MHz, Chloroform-*d*)  $\delta$  157.4, 150.7, 144.1, 141.7, 138.1, 137.1, 127.5, 127.0, 126.7, 126.6, 126.0, 124.9, 123.0, 120.7, 118.6, 34.4, 29.1. IR (KBr,  $\text{cm}^{-1}$ ):  $\nu$  3955, 3847, 3832, 3654, 3527, 3498, 3442, 2979, 2962, 2835, 1645, 1610, 1564, 1521, 1472, 1309, 1272, 1217, 1124, 939, 878, 822, 764, 681; HR-ESI-MS ( $m/z$ ): calcd. for  $\text{C}_{19}\text{H}_{16}\text{O}_2\text{Se}$  [ $\text{M}+\text{H}$ ] $^+$  357.0388, found 357.0388.

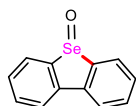

#### Dibenzob[*b,d*]selenophene 5-oxide (**1g**)

Purification by PTLC ( $R_f = 0.48$  in DCM/MeOH = 10:1) afforded **1g** as a yellow solid (109.9 mg, 89% yield). Mp = 192-195°C.  $^1\text{H}$  NMR (400 MHz, Methanol-*d*<sub>4</sub>)  $\delta$  7.95 (d,  $J = 7.7$  Hz, 2H), 7.91 (dd,  $J = 7.7, 1.2$  Hz, 2H), 7.61 (td,  $J = 7.6, 1.2$  Hz, 2H), 7.47 (td,  $J = 7.6, 1.2$  Hz, 2H).  $^{13}\text{C}$  NMR (101 MHz, Methanol-*d*<sub>4</sub>)  $\delta$  144.9, 141.0, 132.7, 129.9, 128.5, 123.3.

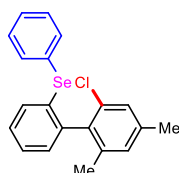

#### (2'-Chloro-4',6'-dimethyl-[1,1'-biphenyl]-2-yl)(phenyl)selane (**19f**)

Purification by PTLC ( $R_f = 0.45$  in petroleum ether) afforded **19f** as a yellow solid (4.5 mg, 6% yield). Mp = 182.6-185°C.  $^1\text{H}$  NMR (400 MHz, Chloroform-*d*)  $\delta$  8.33 (d,  $J = 8.2$  Hz, 1H), 7.90 (dd,  $J = 7.9, 1.3$  Hz, 1H), 7.58 (s, 1H), 7.52 – 7.42 (m, 3H), 7.35 (td,  $J = 7.6, 1.3$  Hz, 1H), 7.27 (dd,  $J = 4.9, 1.8$  Hz, 3H), 7.07 (s, 1H), 2.88 (s, 3H), 2.44 (s, 3H).  $^{13}\text{C}$  NMR (101 MHz, Chloroform-*d*)  $\delta$  140.2, 139.6, 139.2, 136.2, 135.7, 134.0, 133.0, 131.2, 129.6, 129.3, 127.3, 126.3, 126.1, 125.5, 124.6, 124.0, 23.3, 21.1. GC-MS (EI): calcd. for  $\text{C}_{20}\text{H}_{17}\text{SeCl}$  [ $\text{M}^+$ ] 372; found 372.

## 9. References.

- [1] G. A. M. Jardim, Í. A. O. Bozzi, W. X. C. Oliveira, C. Mesquita-Rodrigues, R. F. S. Menna-Barreto, R. A. Kumar, E. Gravel, E. Doris, A. L. Braga and E. N. da Silva Júnior, *New. J. Chem.*, 2019, **43**, 13751-13763.

- [2] V. P. Reddy, A. V. Kumar, K. Swapna and K. R. Rao, *Org. Lett.*, 2009, **11**, 951-953.
- [3] M. Tobisu, Y. Masuya, K. Baba and N. Chatani, *Chem. Sci.*, 2016, **7**, 2587-2591..
- [4] Z. Ai, J. Xiao, Y. Li, B. Guo, Y. Du and K. Zhao, *Org. Chem. Front.*, 2020, **7**, 3935-3940.
- [5] J. D. Fang, X. B. Yan, L. Zhou, Y. Z. Wang and X. Y. Liu, *Adv. Synth. Catal.*, 2019, **361**, 1985-1990.
- [6] P. Ghosh, A. K. Nandi, G. Chhetri and S. Das, *J. Org. Chem.*, 2018, **83**, 12411-12419.
- [7] S. Saba, J. Rafique, M. S. Franco, A. R. Schneider, L. Espindola, D. O. Silva and A. L. Braga, *Org. Biomol. Chem.*, 2018, **16**, 880-885.
- [8] Z. Song, C. Ding, S. Wang, Q. Dai, Y. Sheng, Z. Zheng and G. Liang, *Chem. Commun.*, 2020, **56**, 1847-1850.



## 10. Copies of NMR spectra.

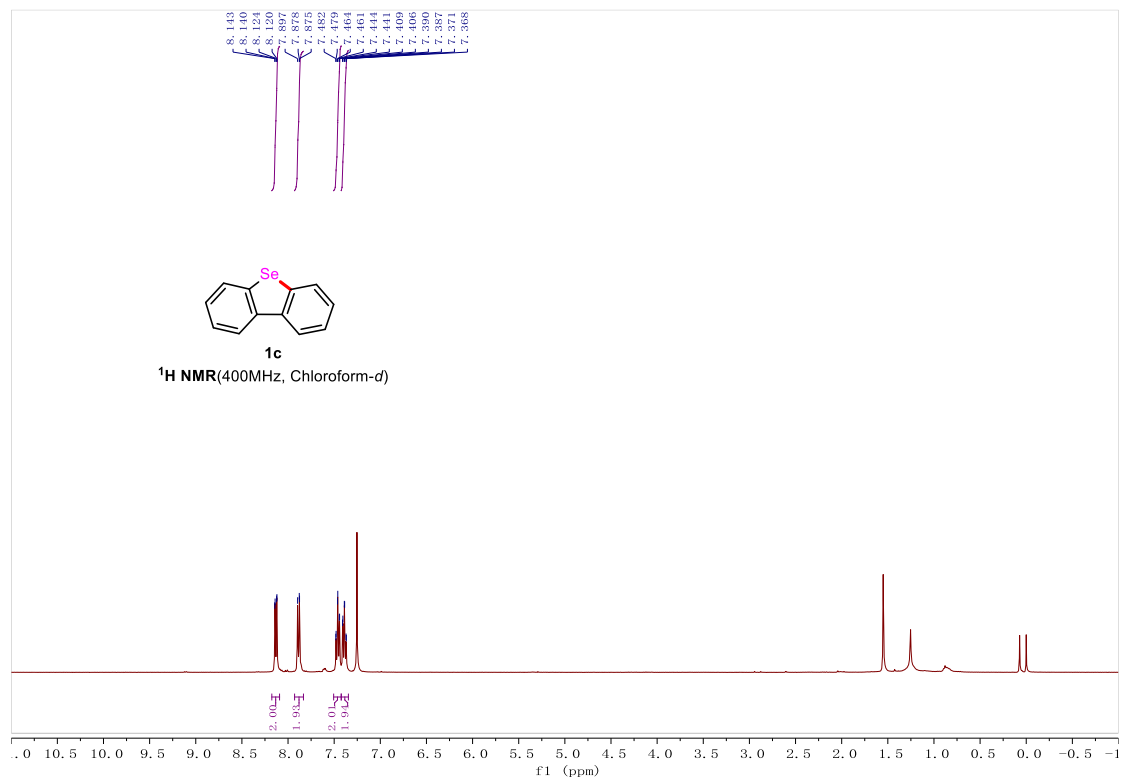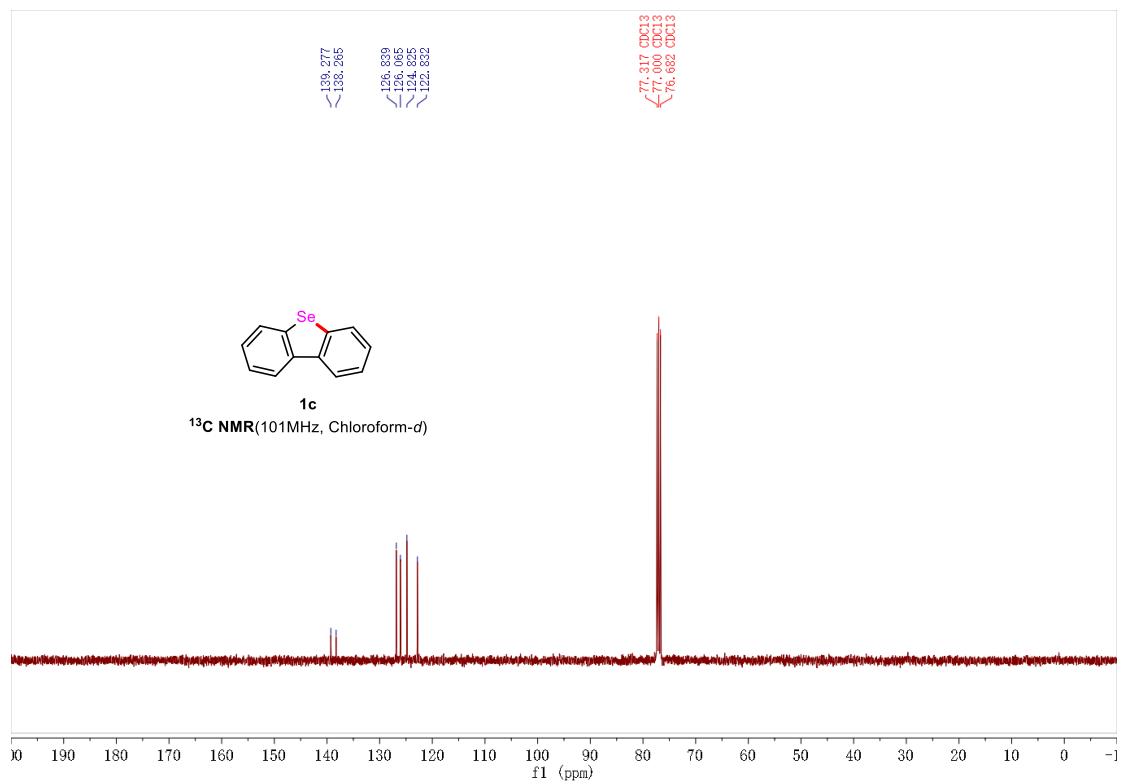

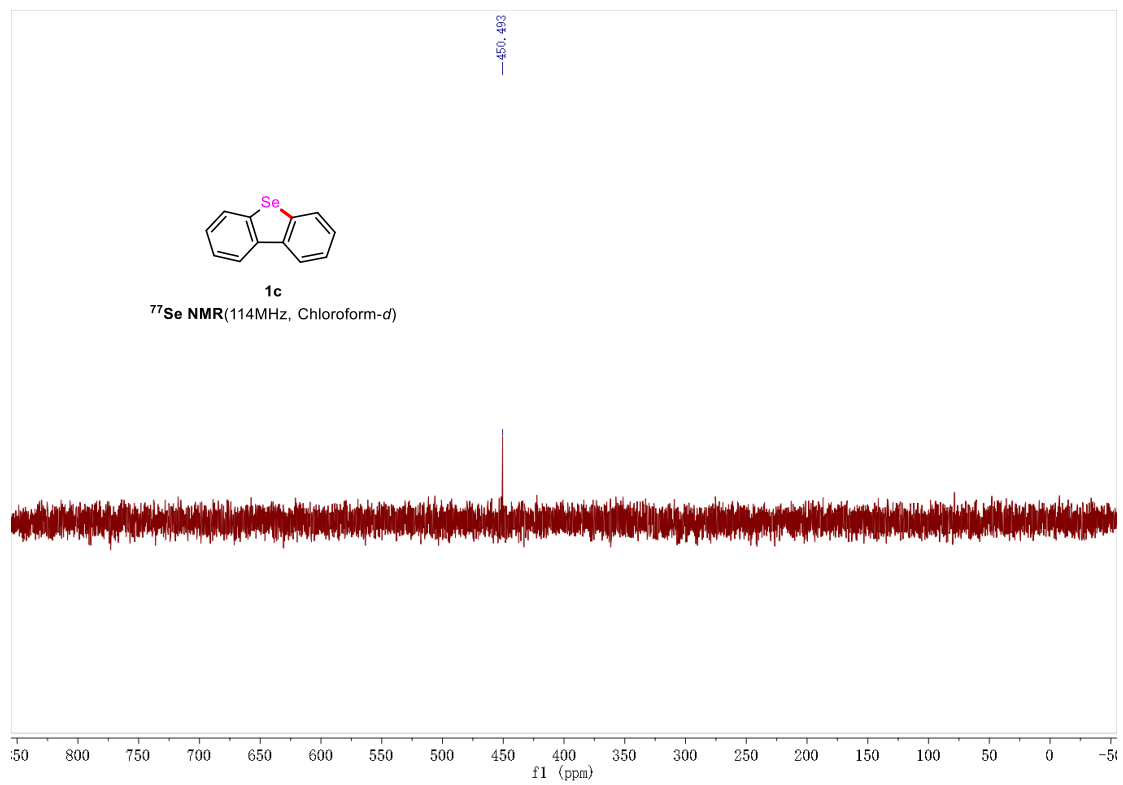

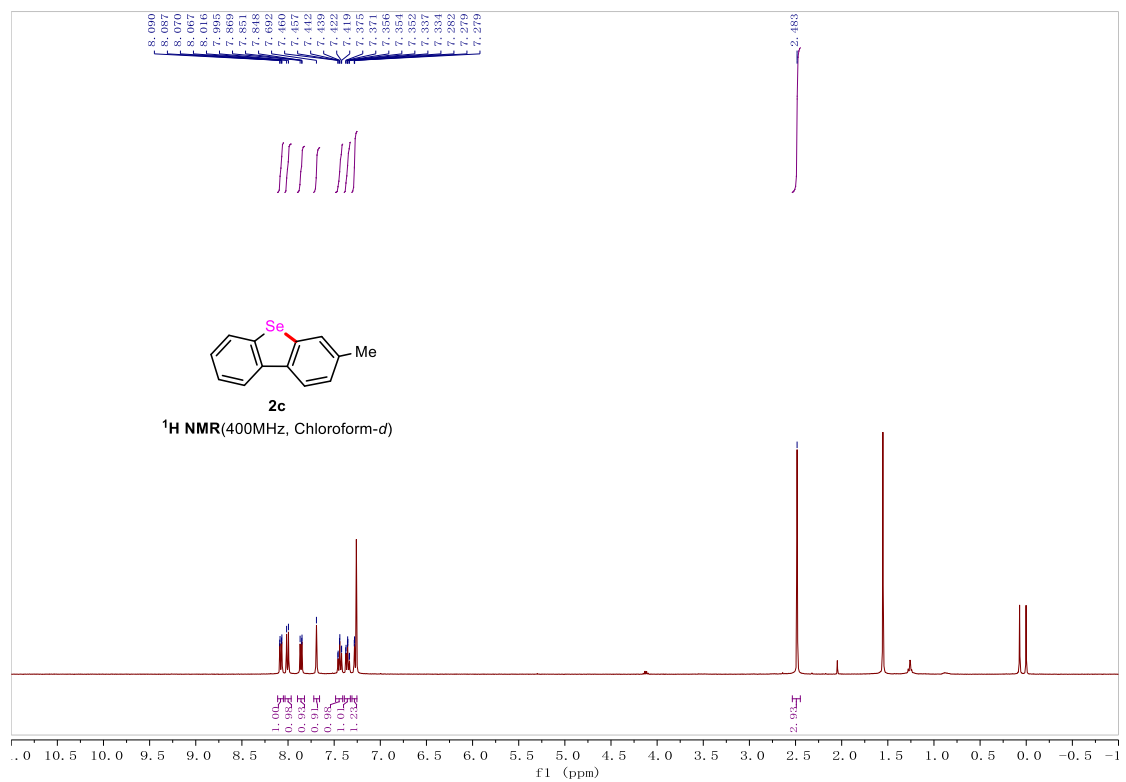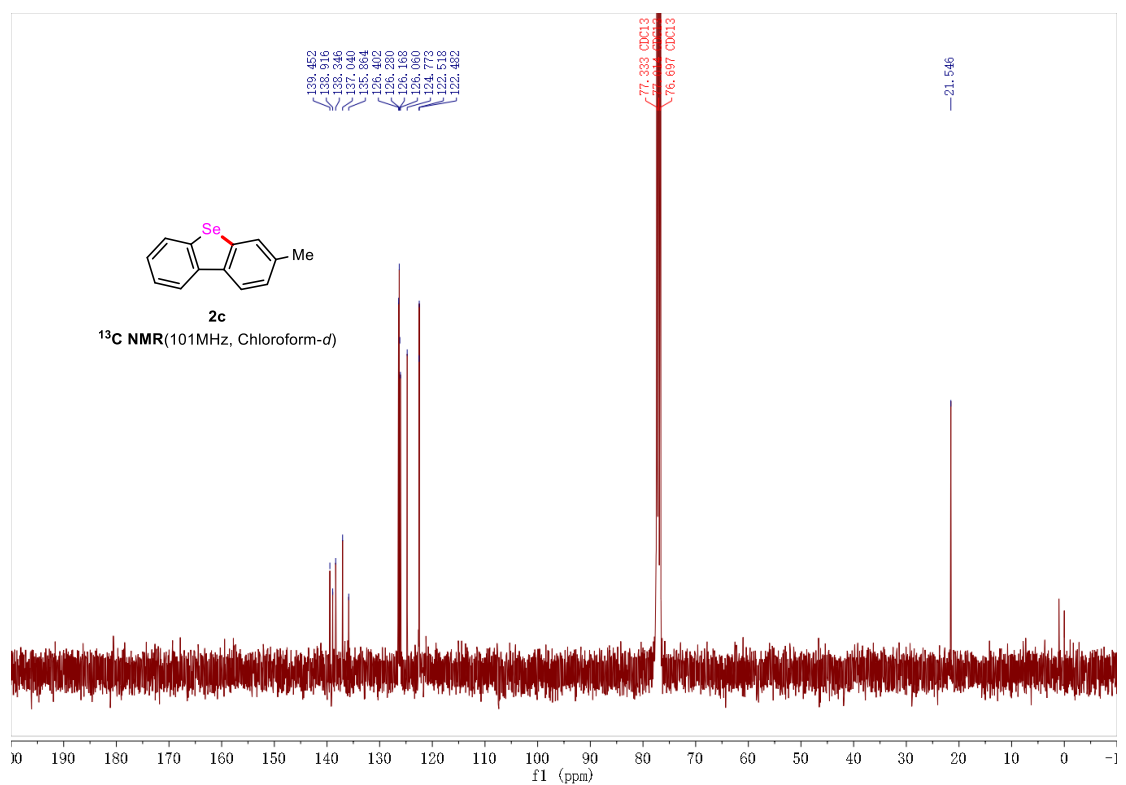

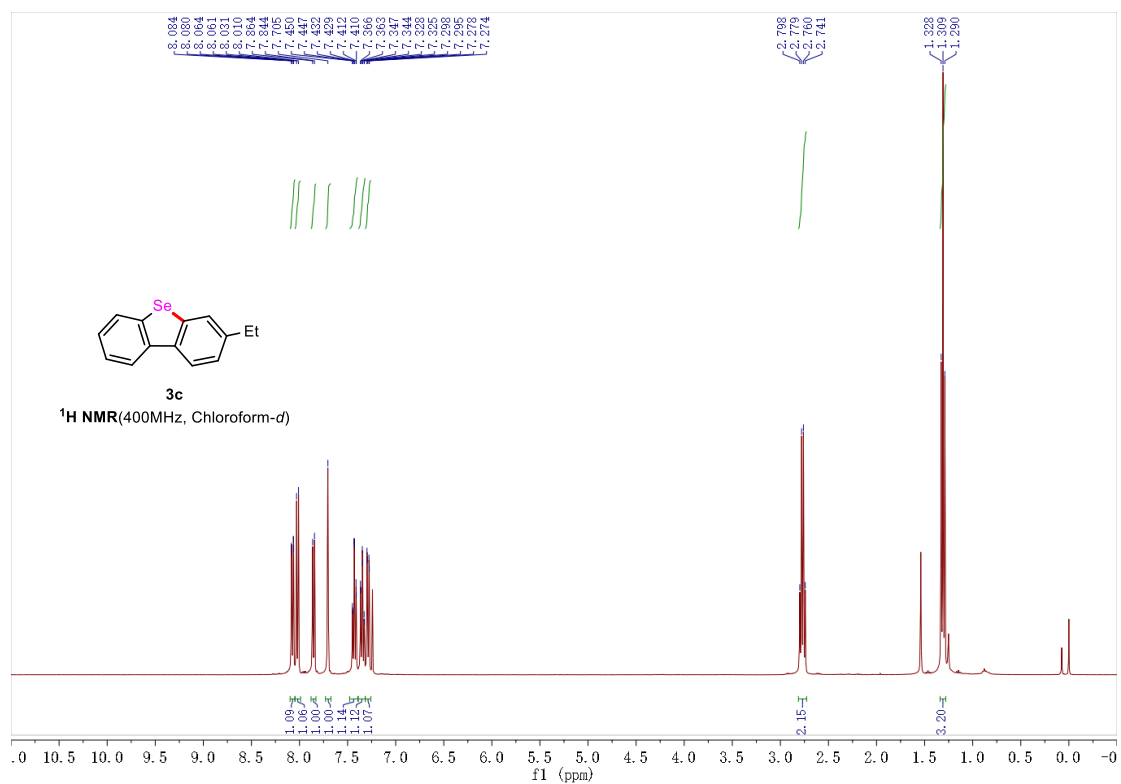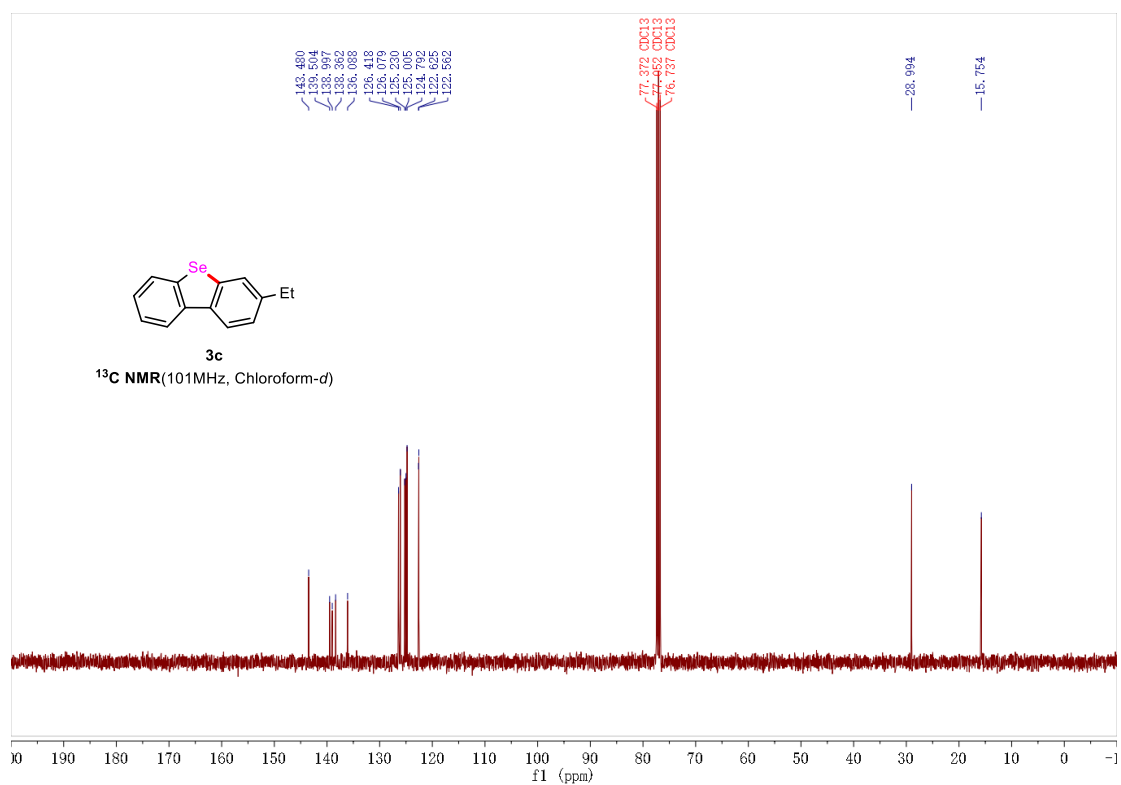

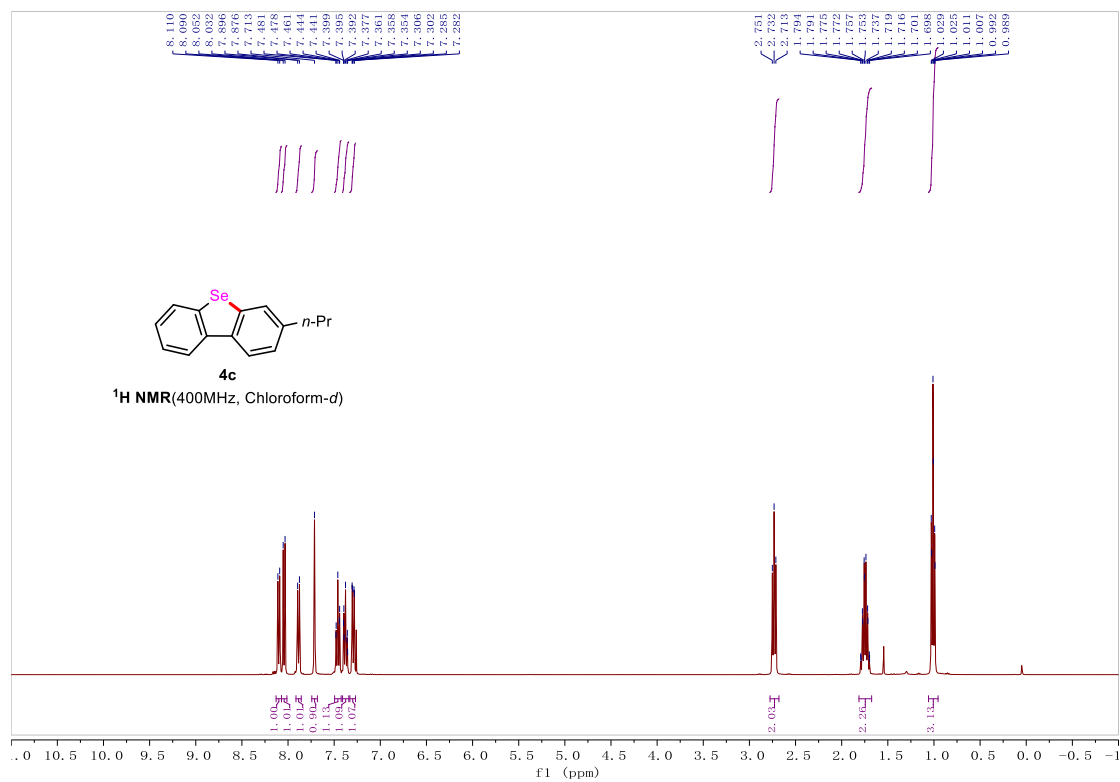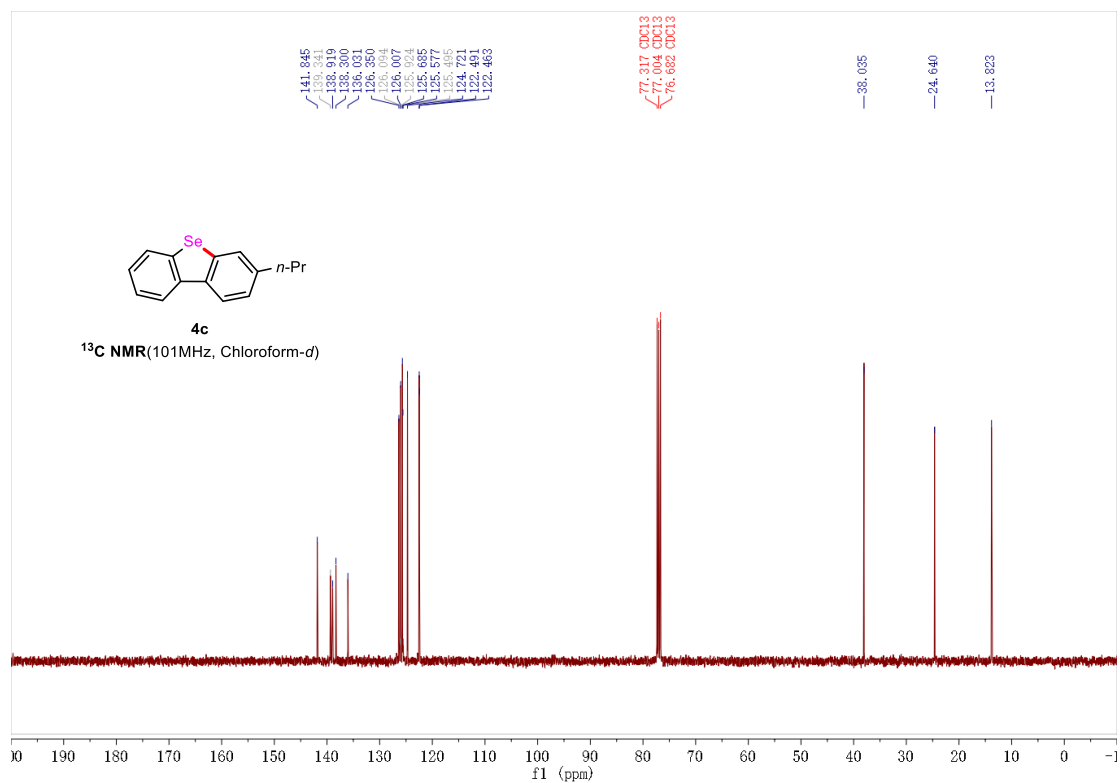

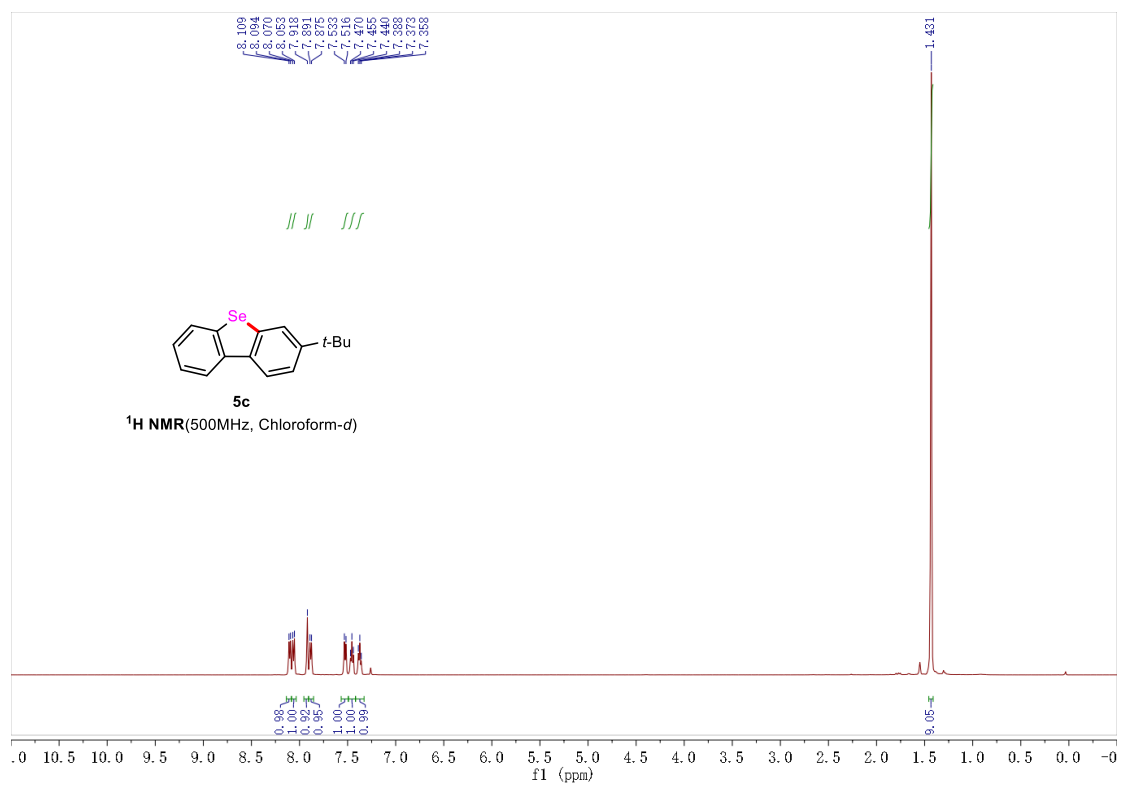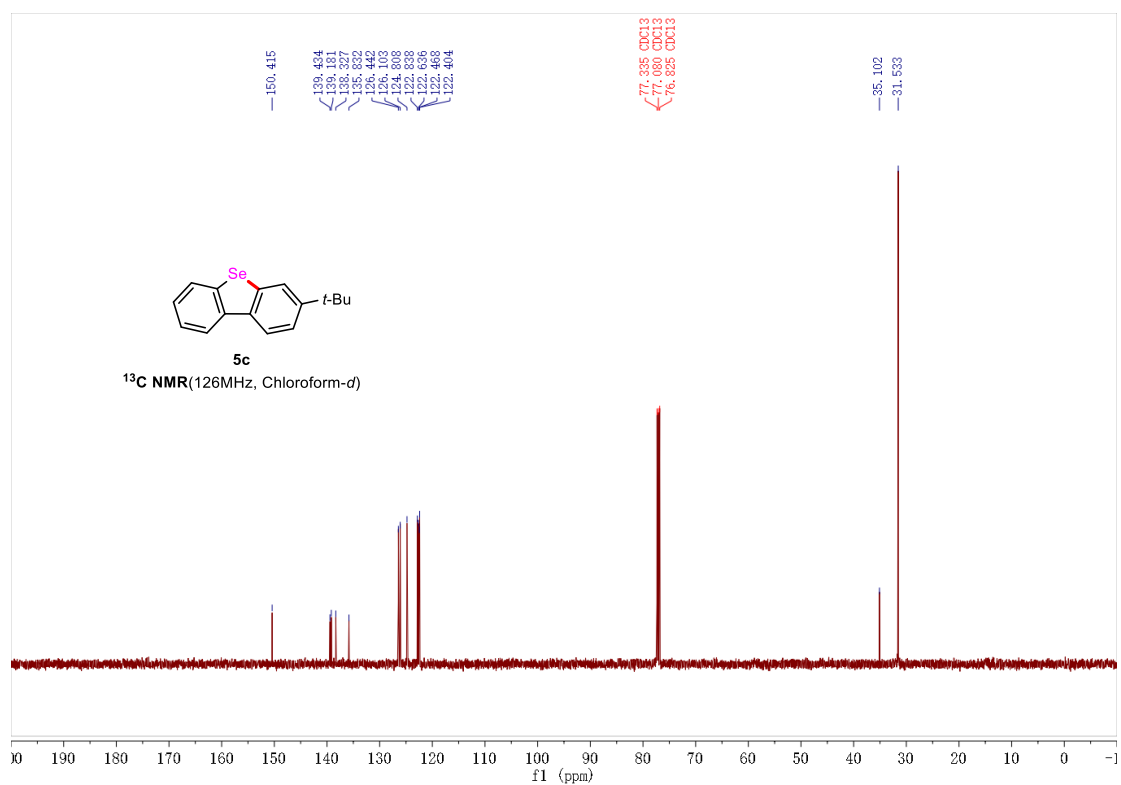

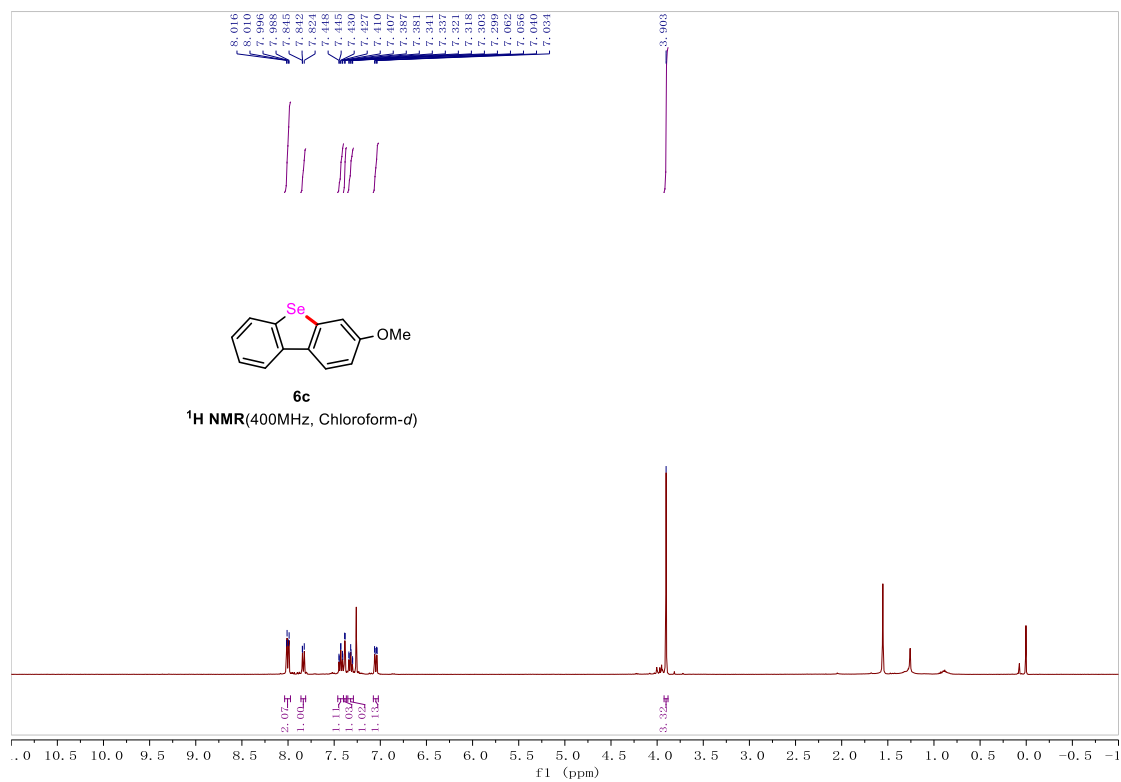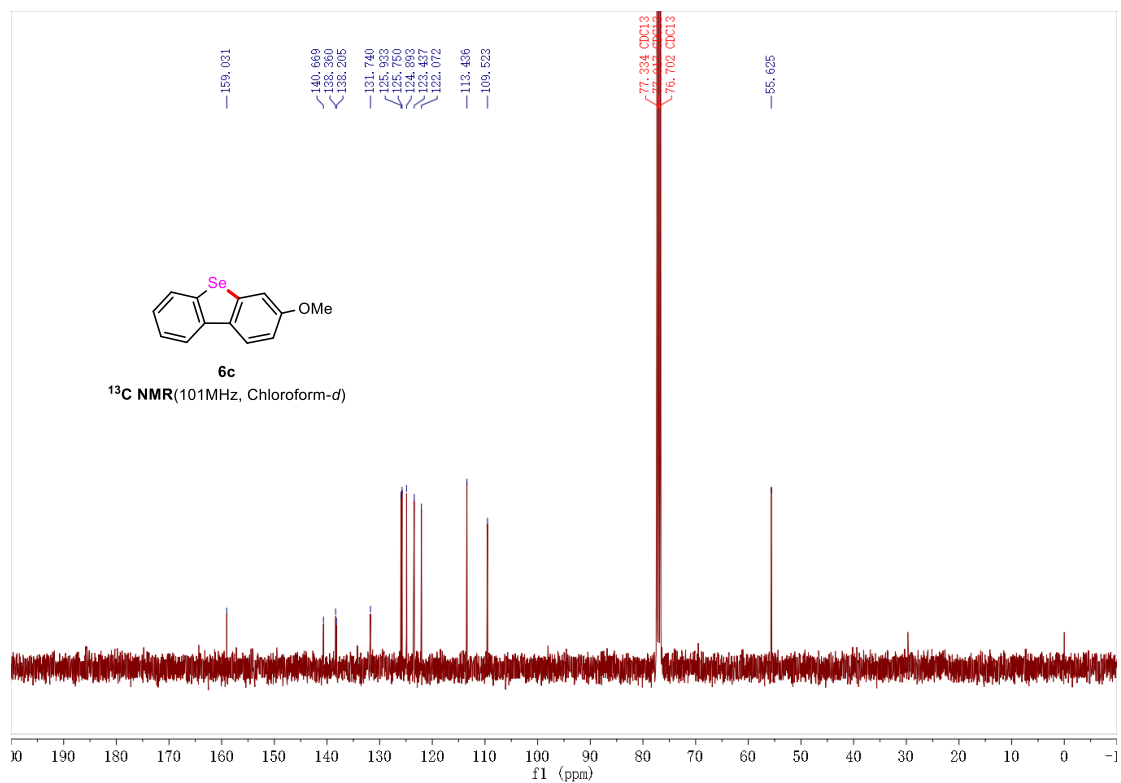

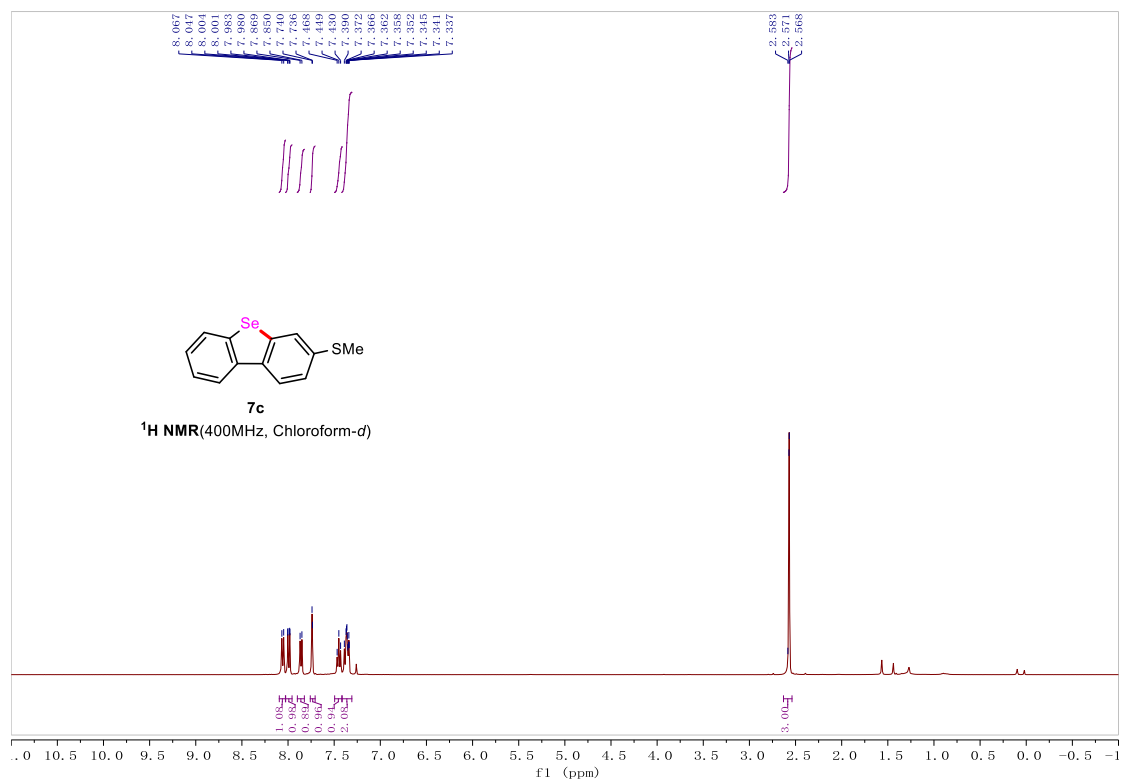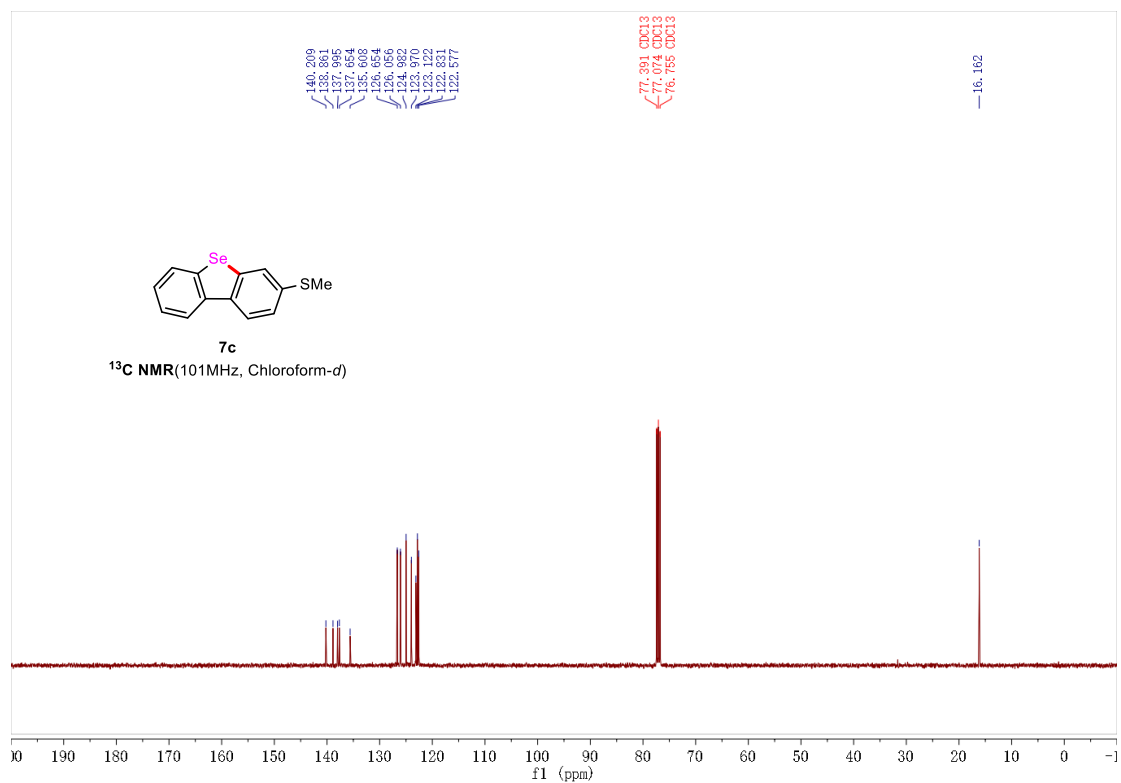



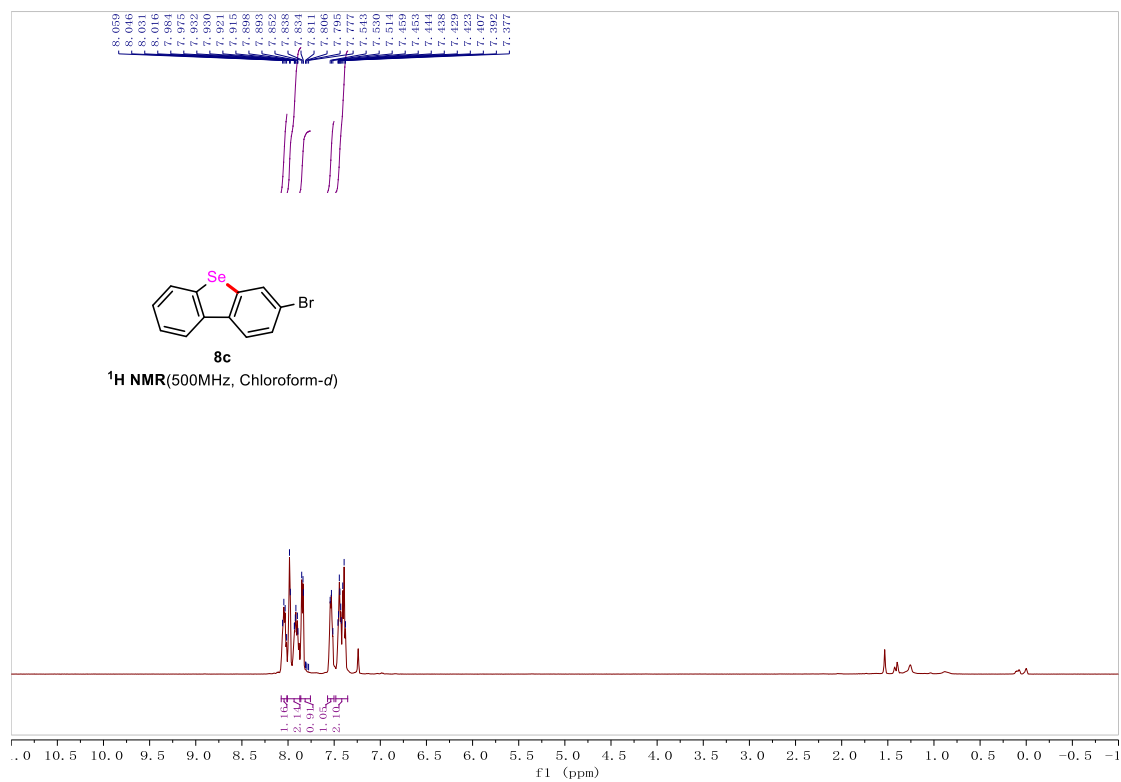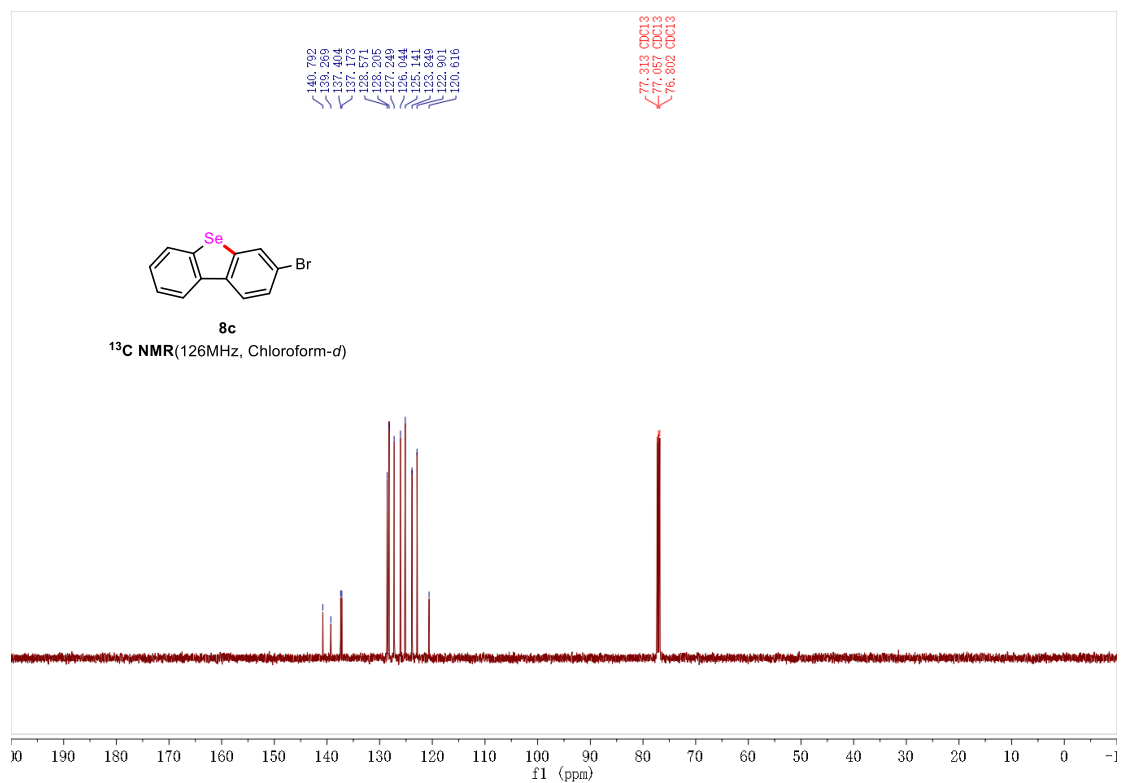

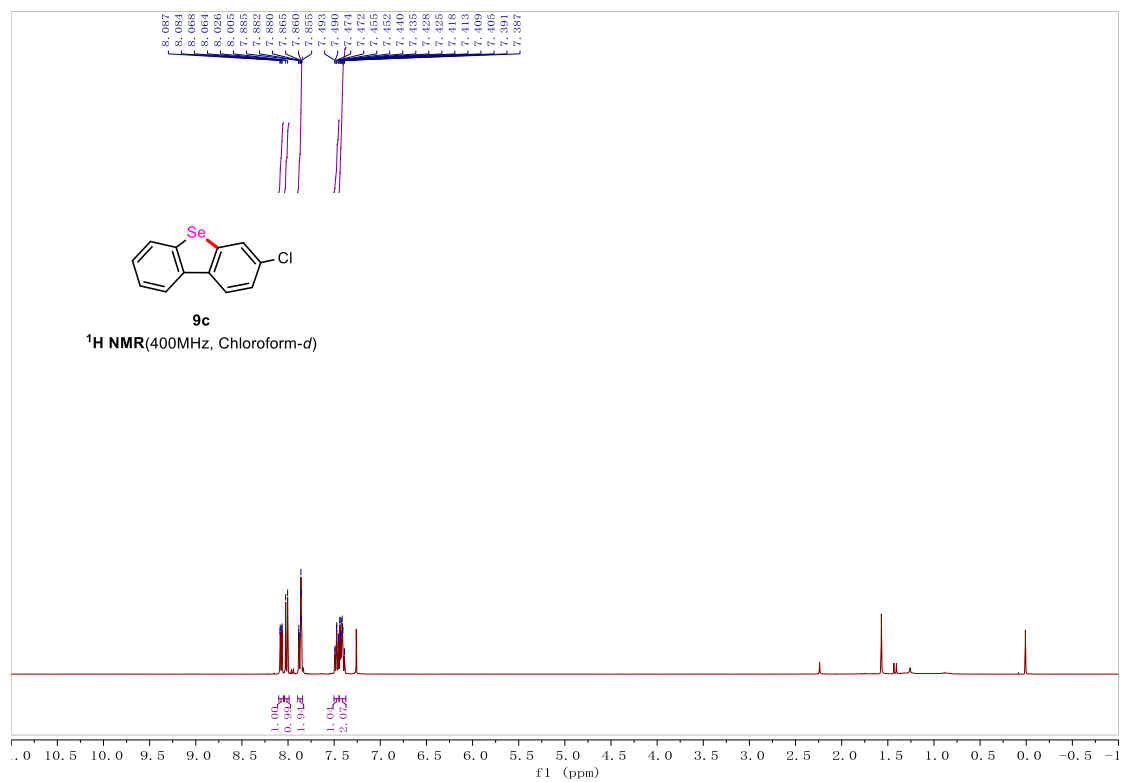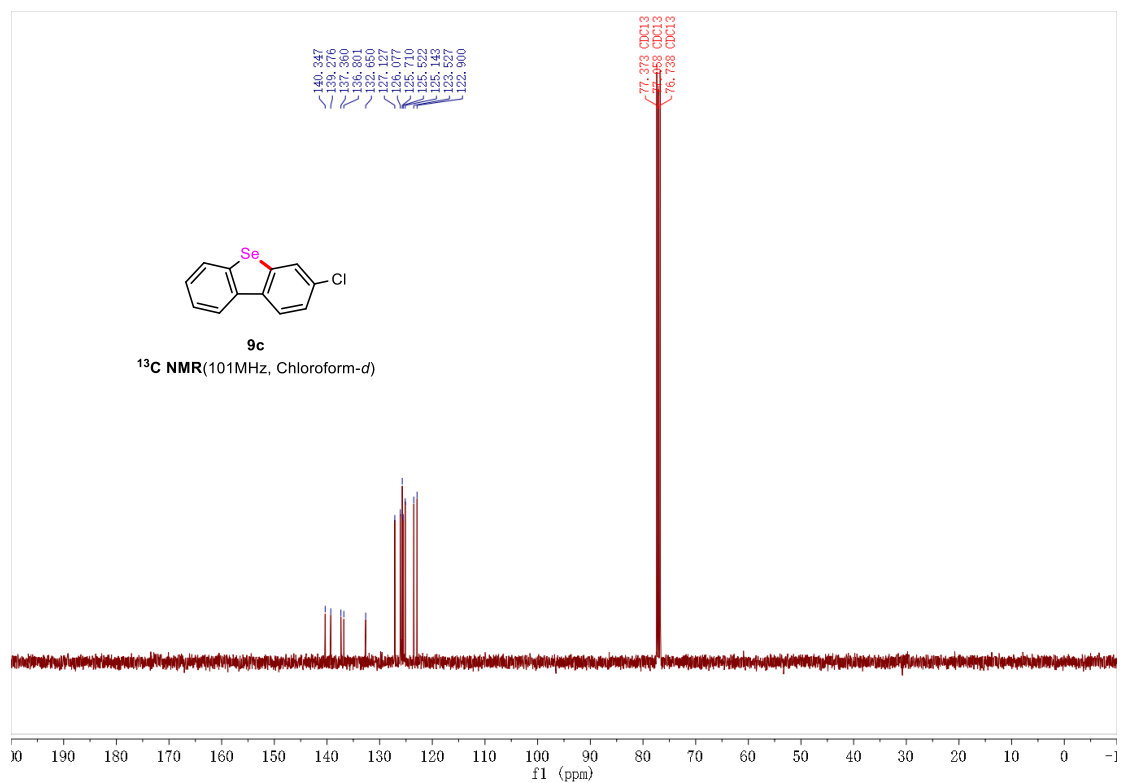

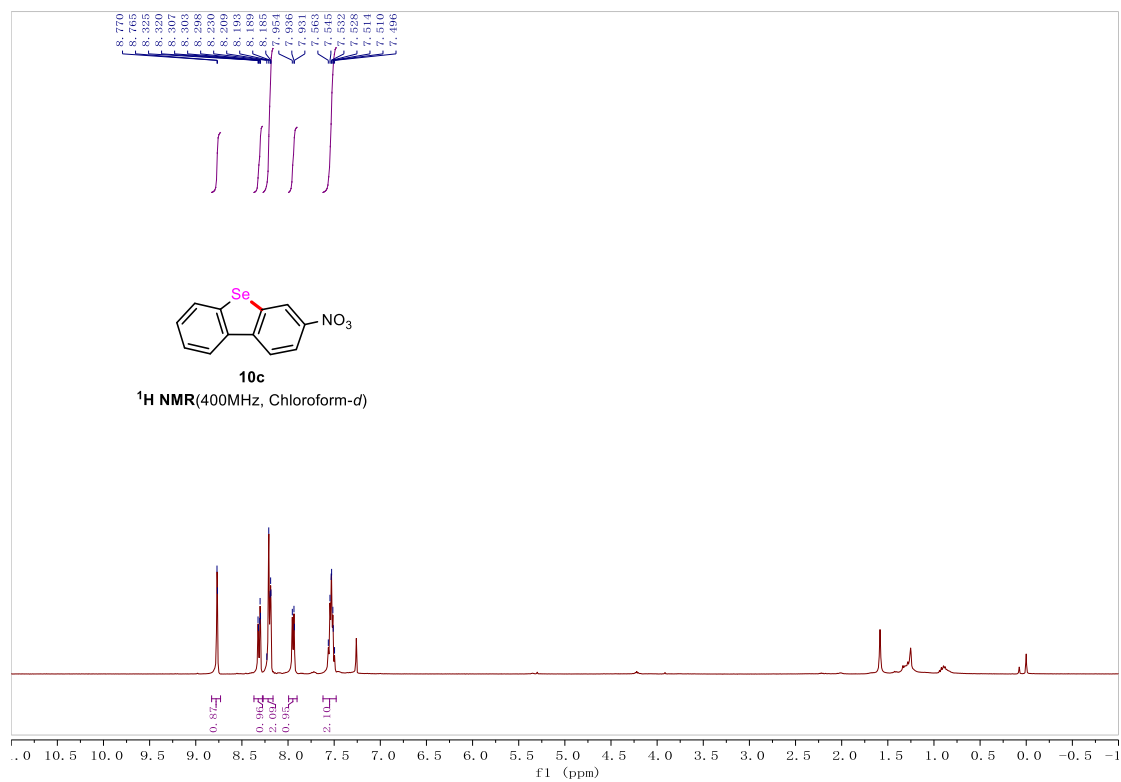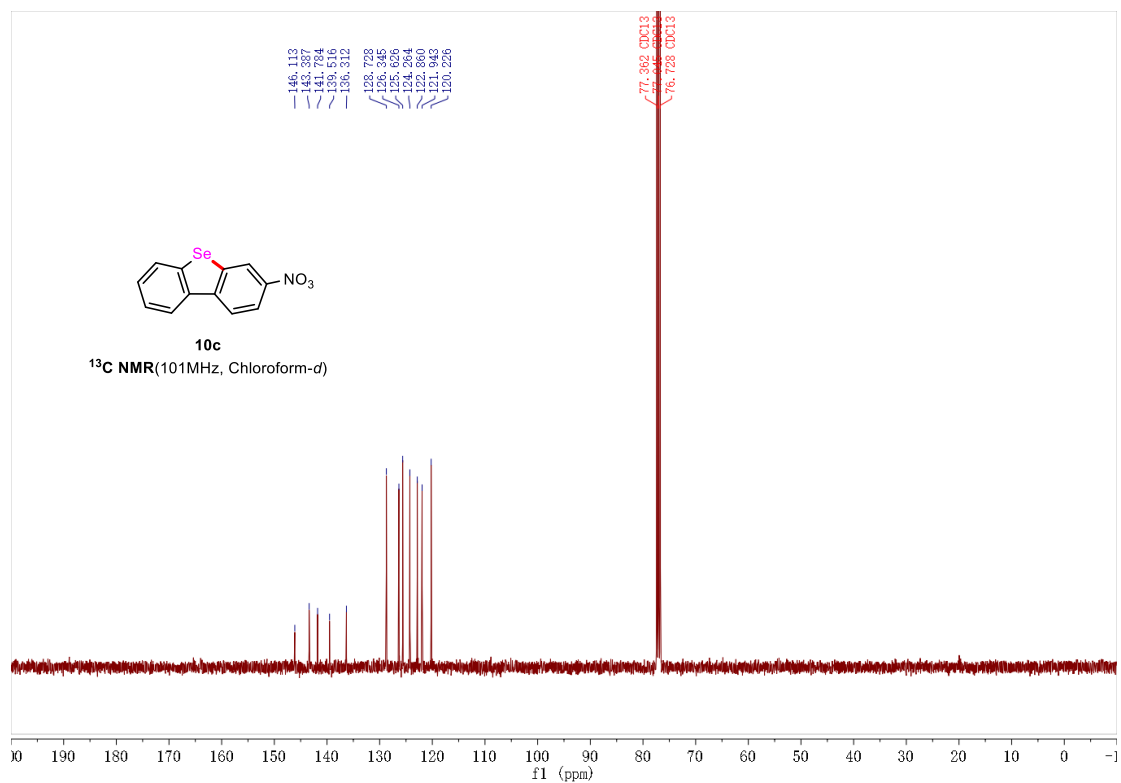

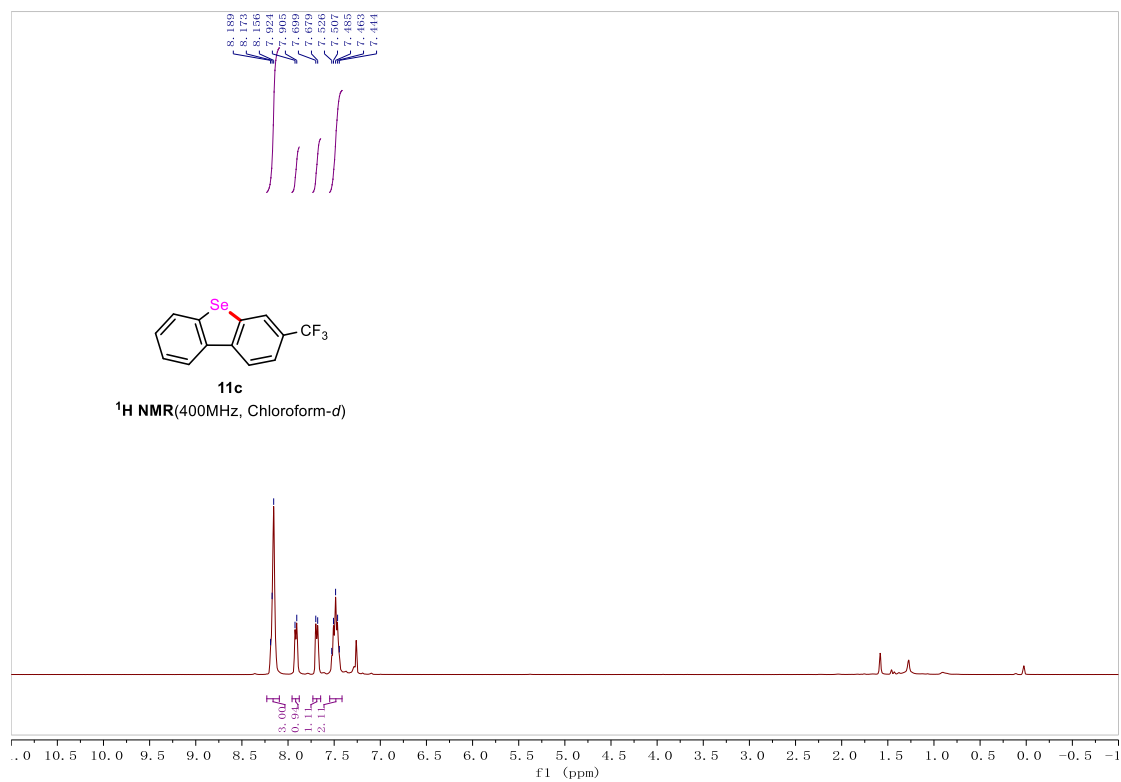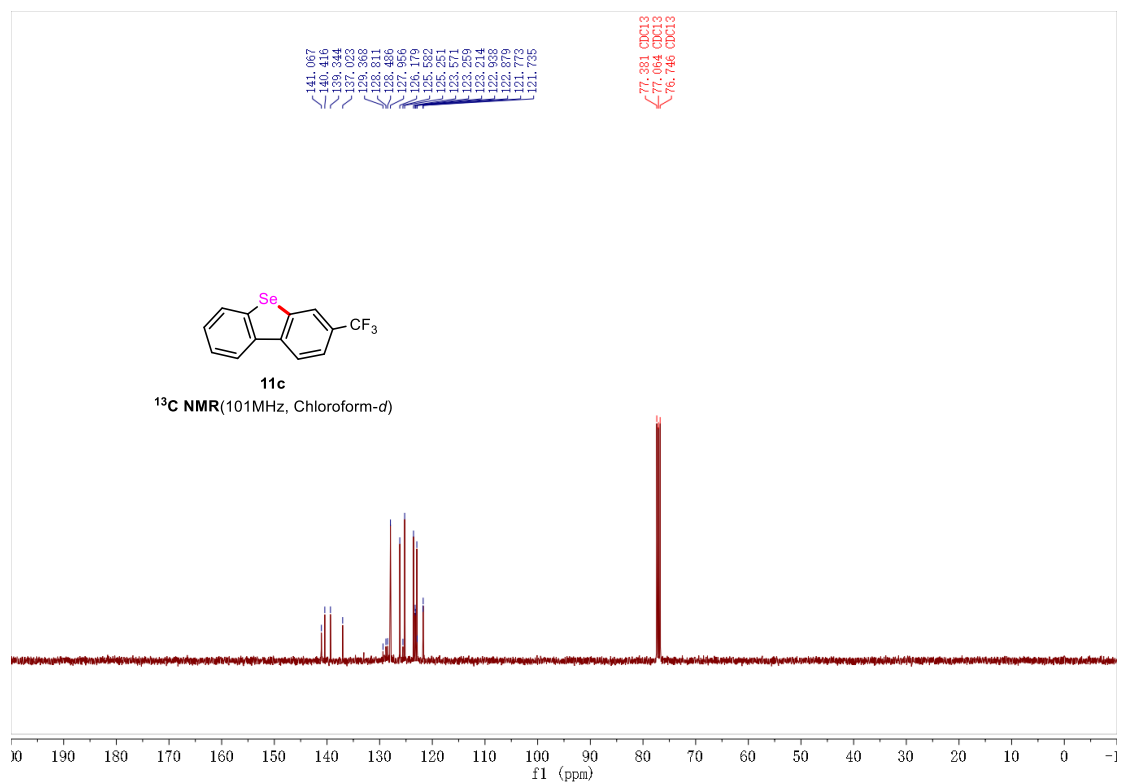

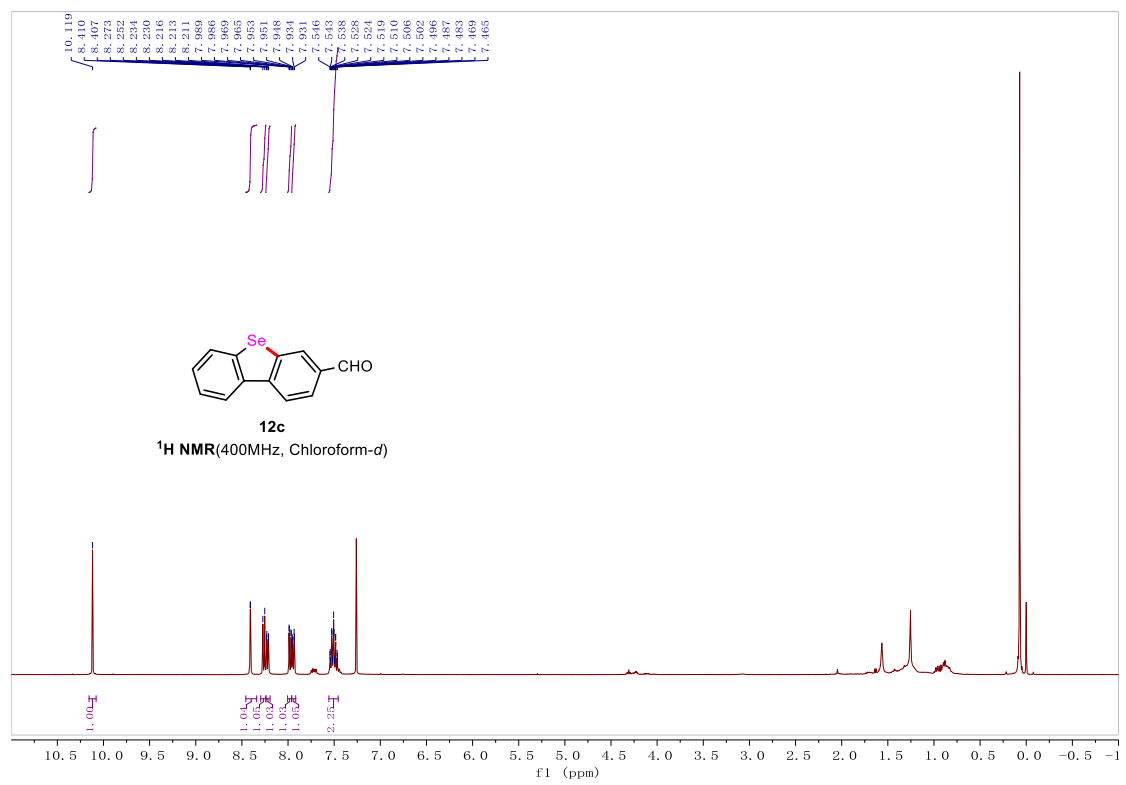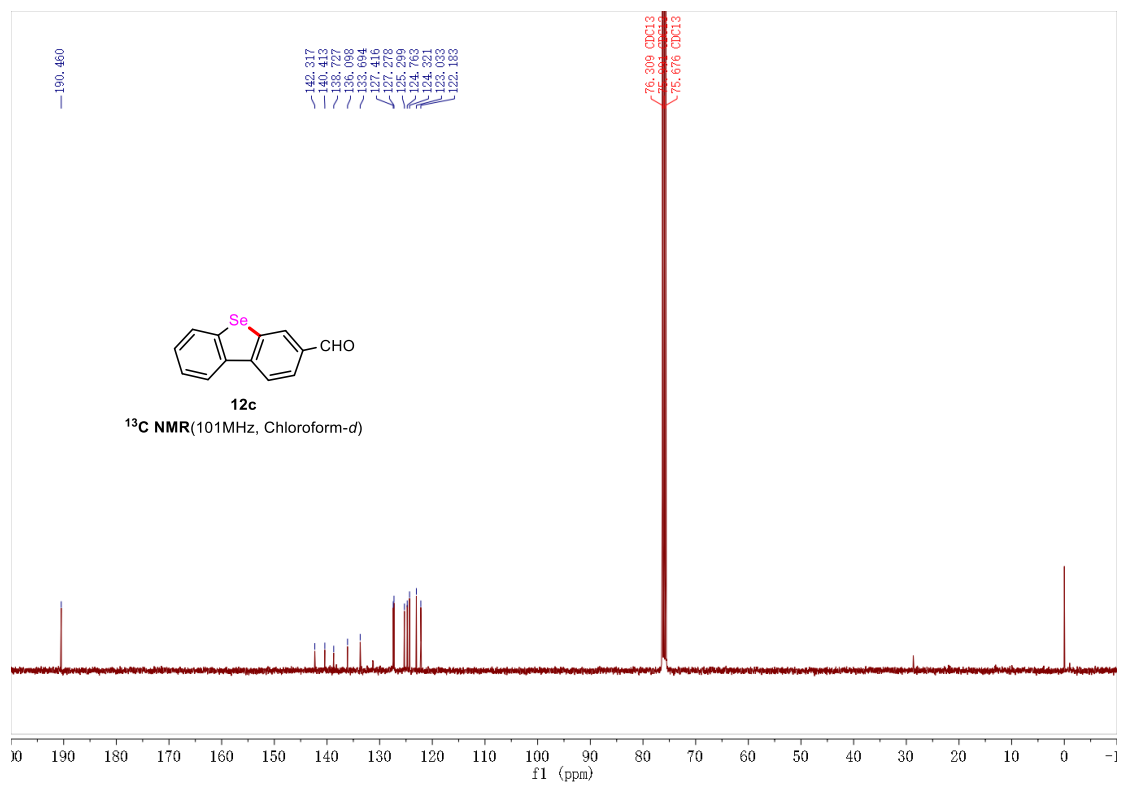

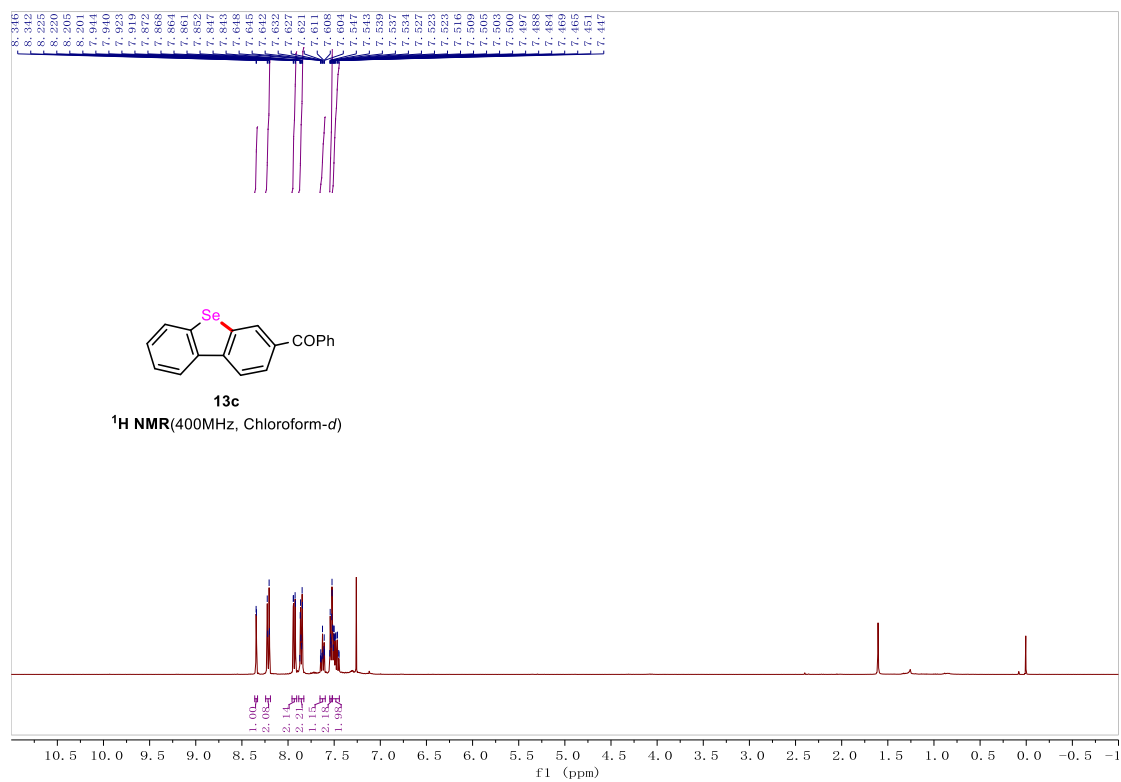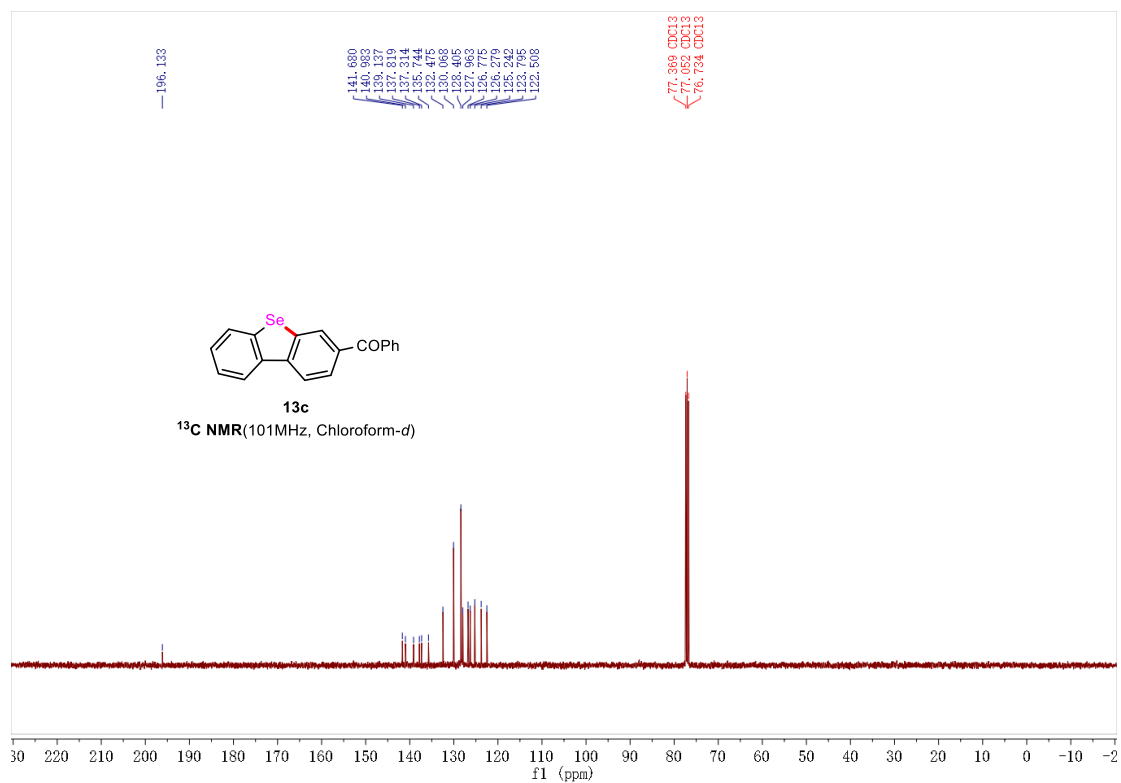

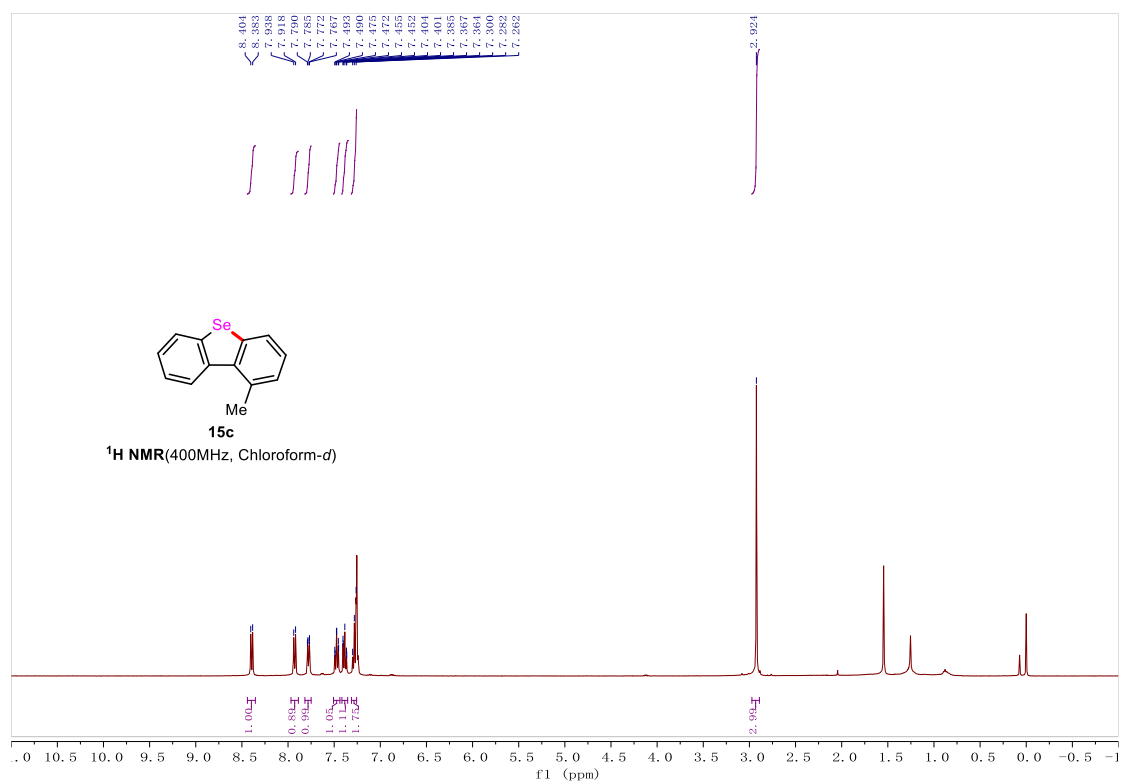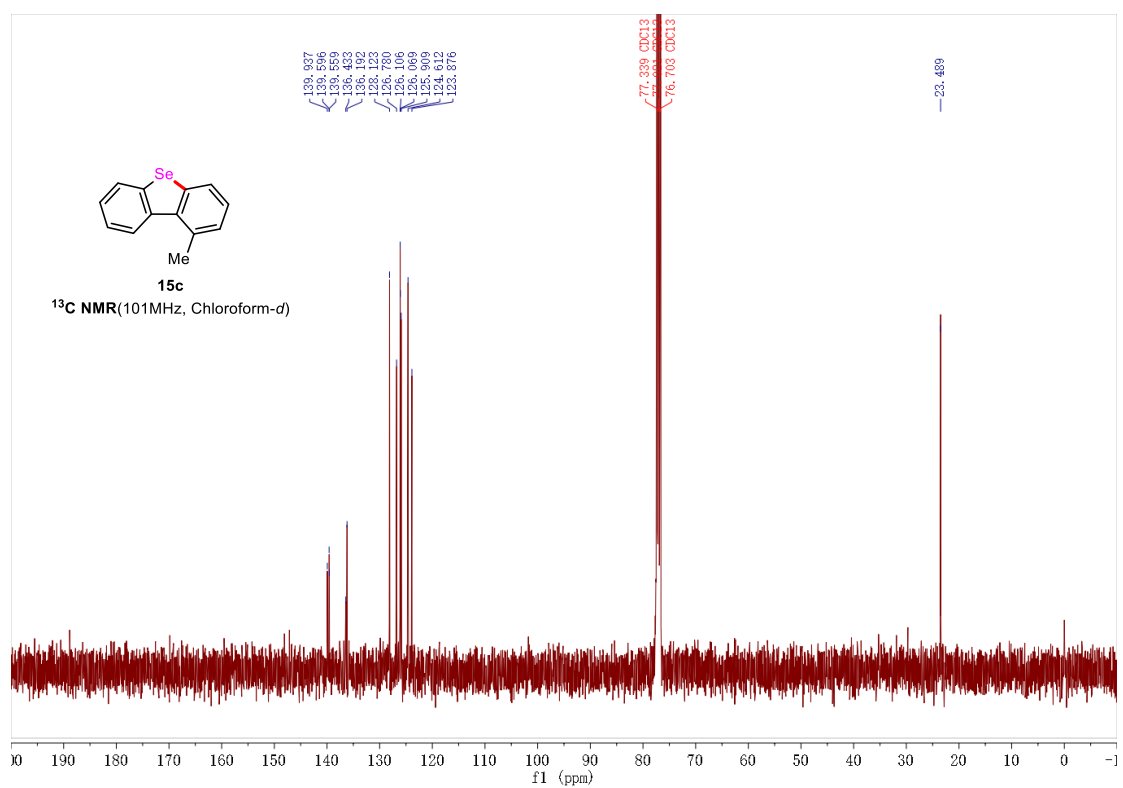

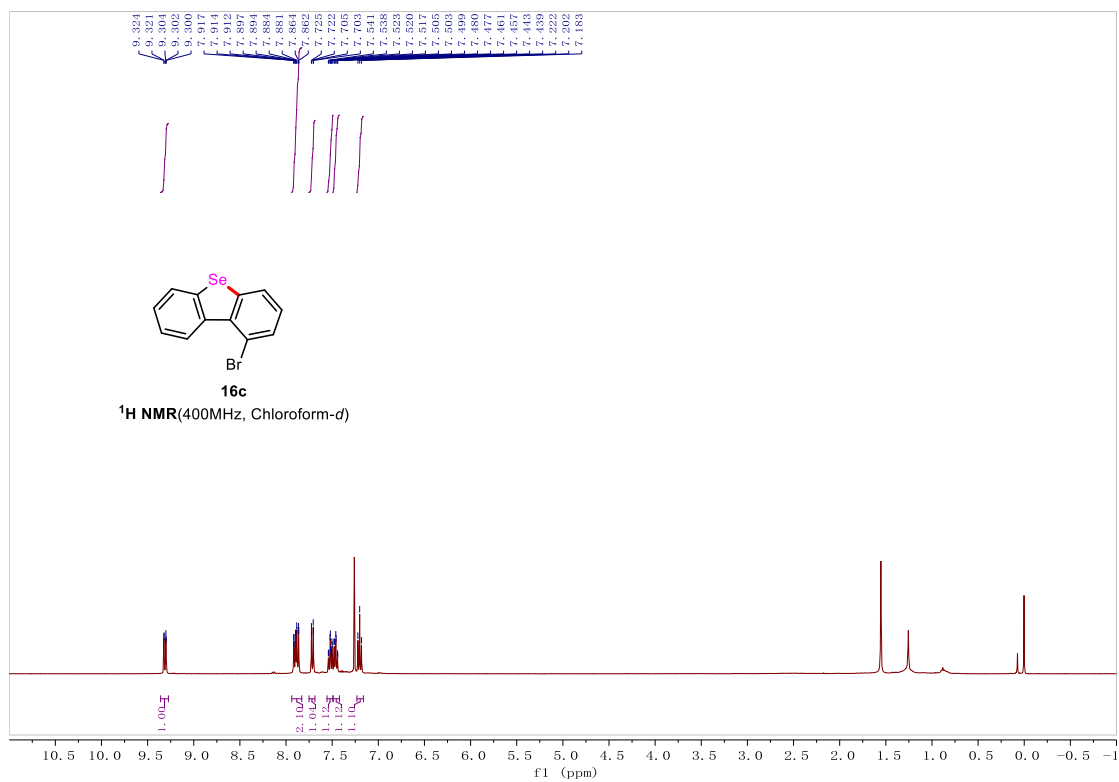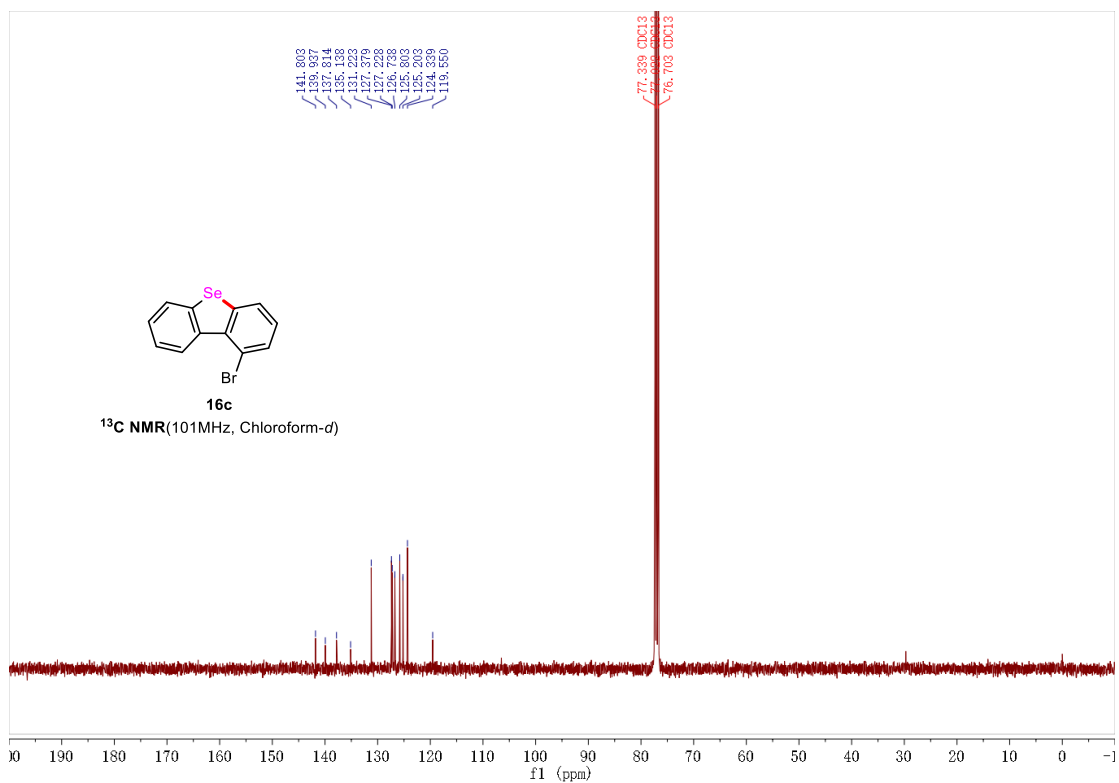



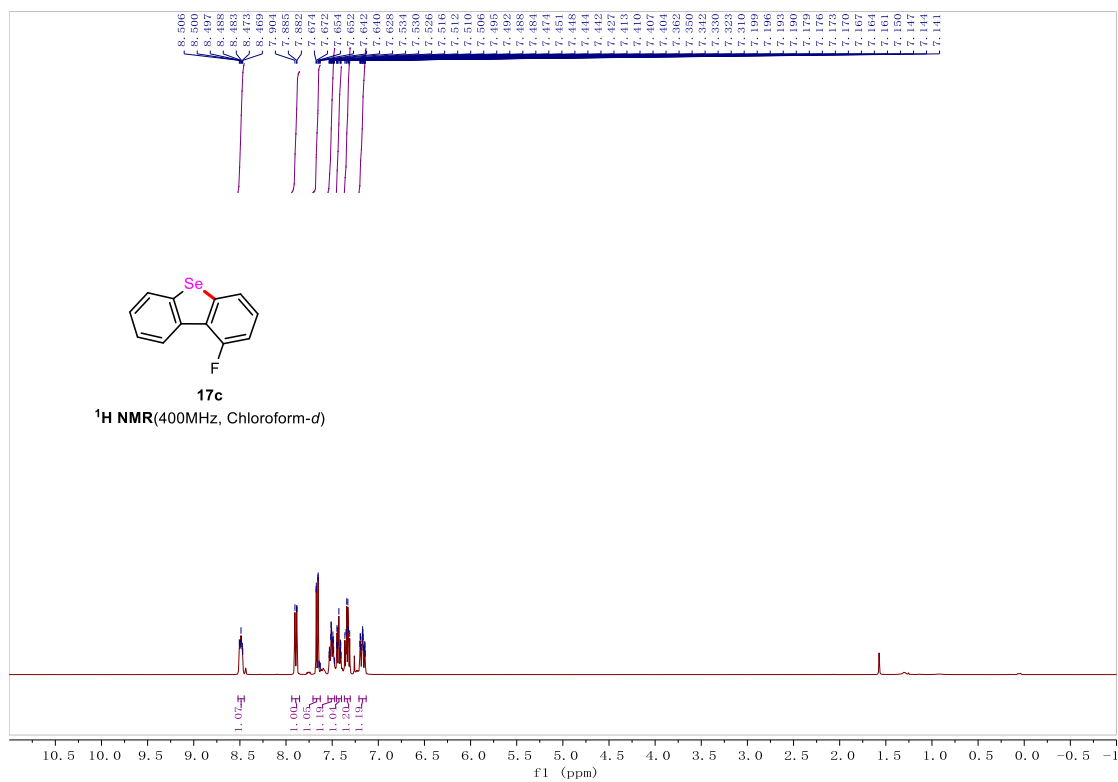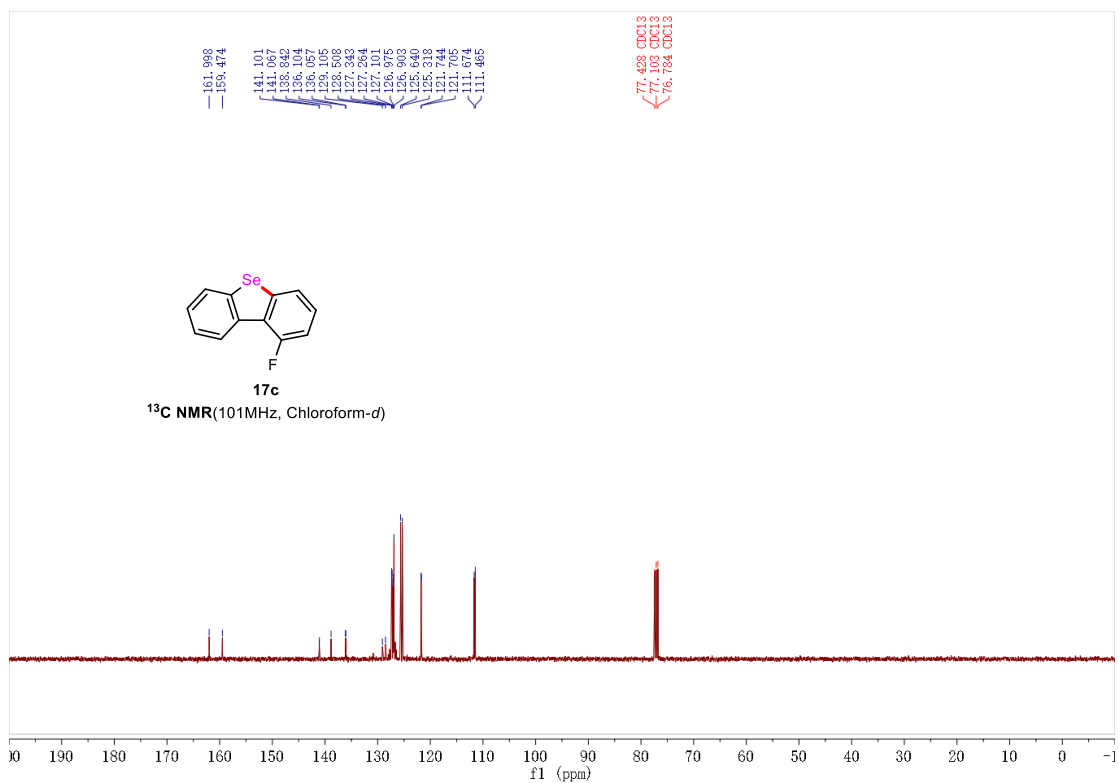

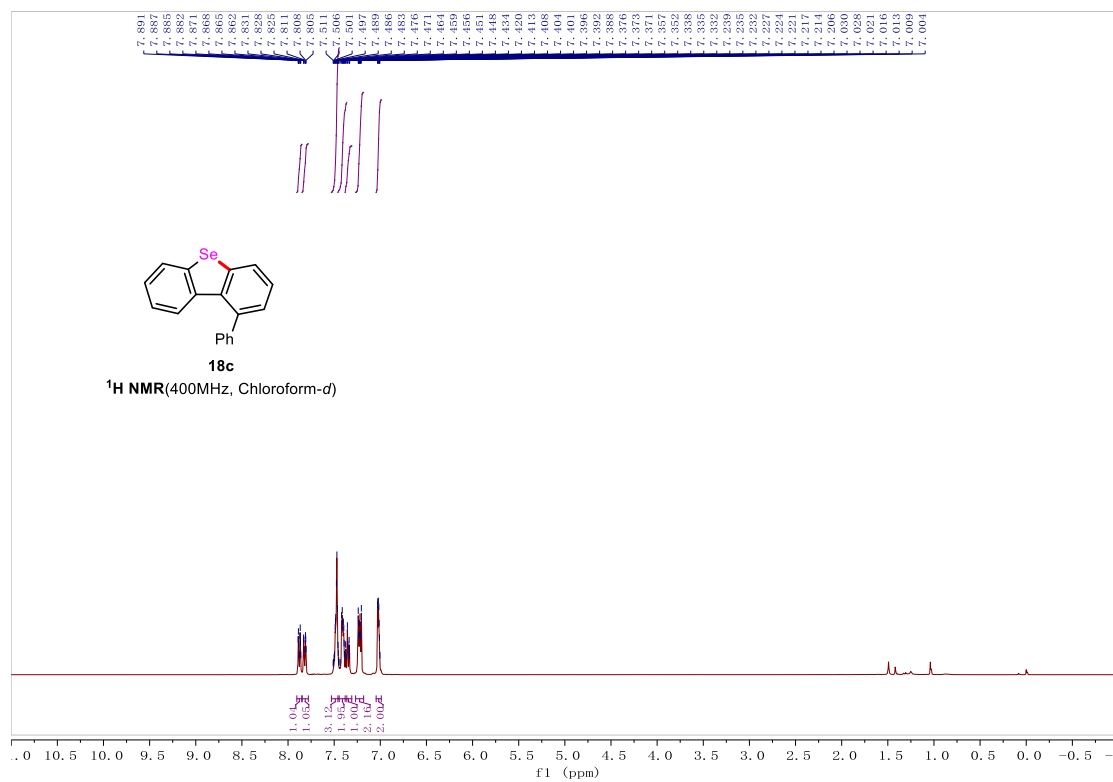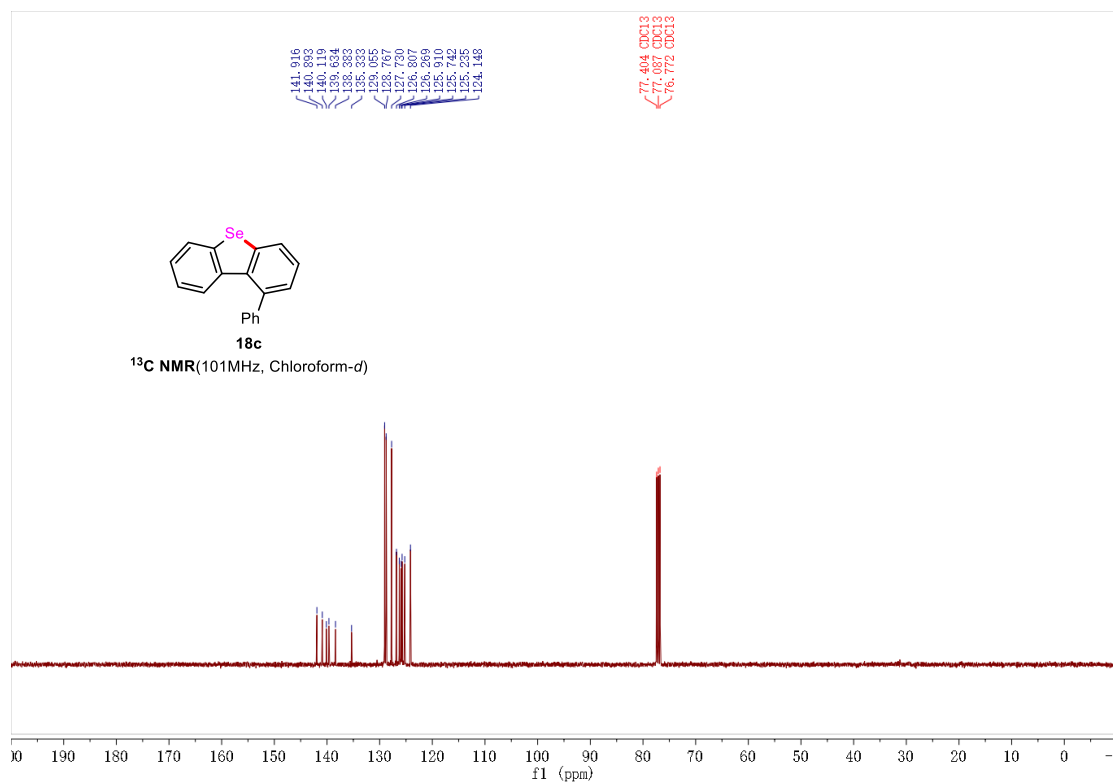

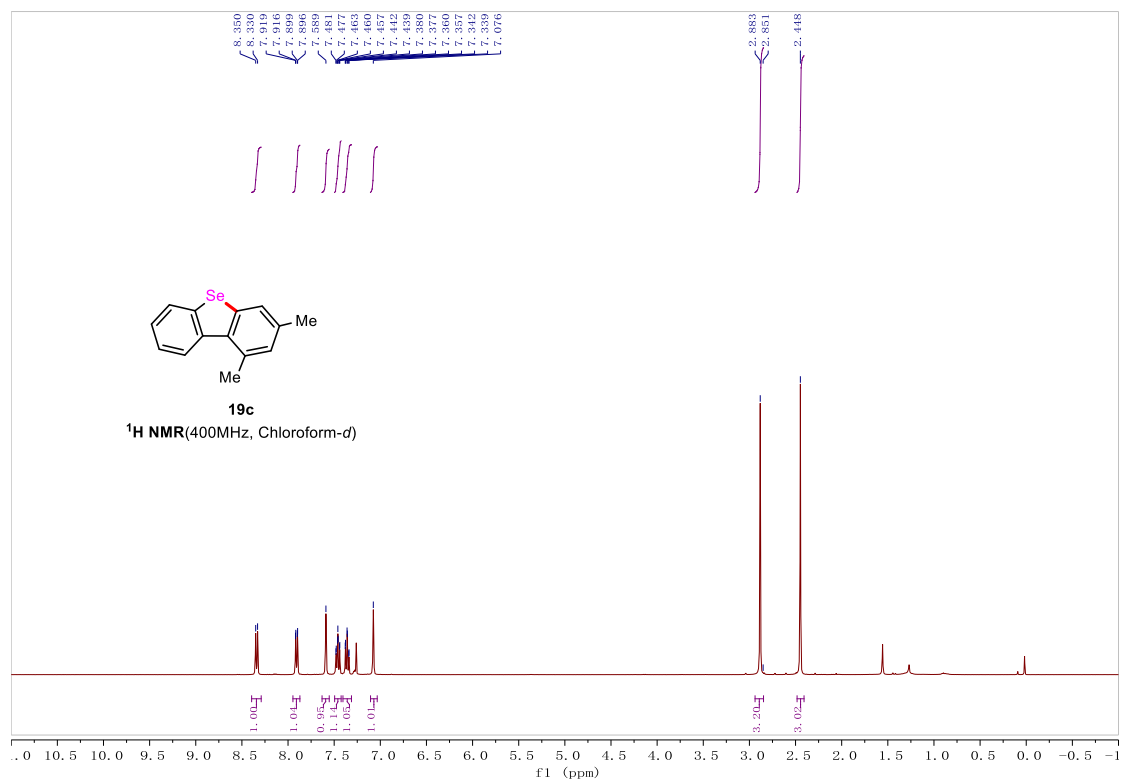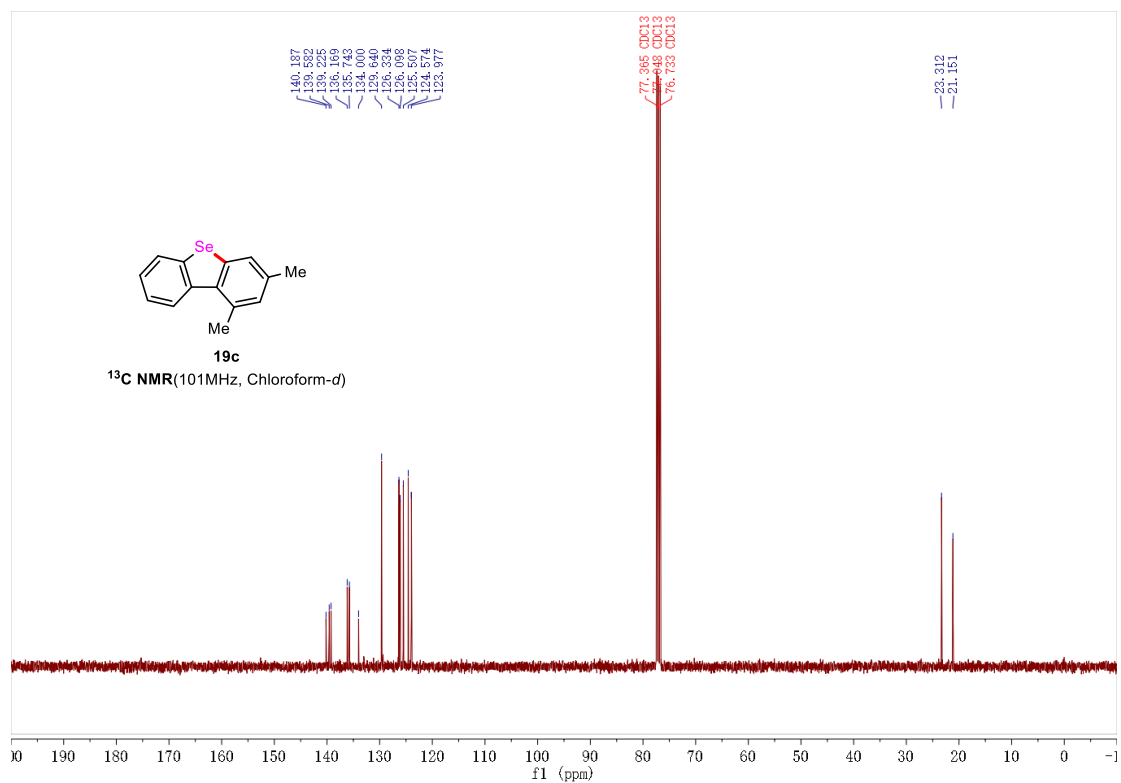

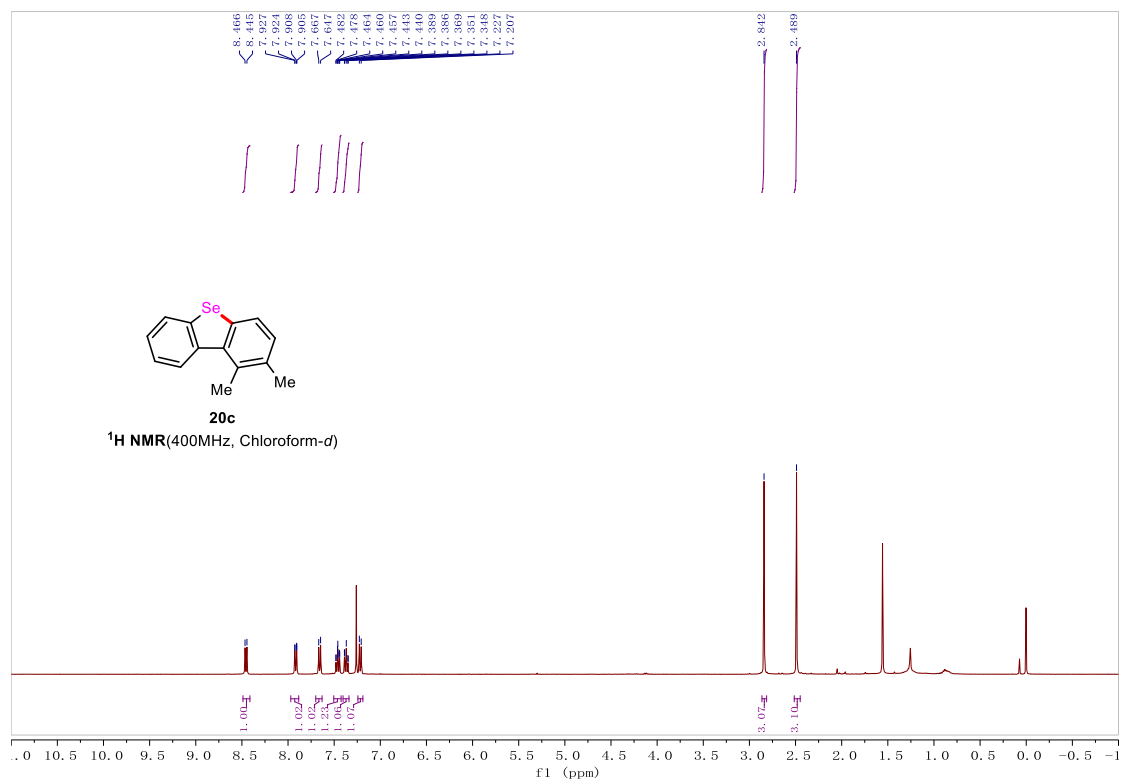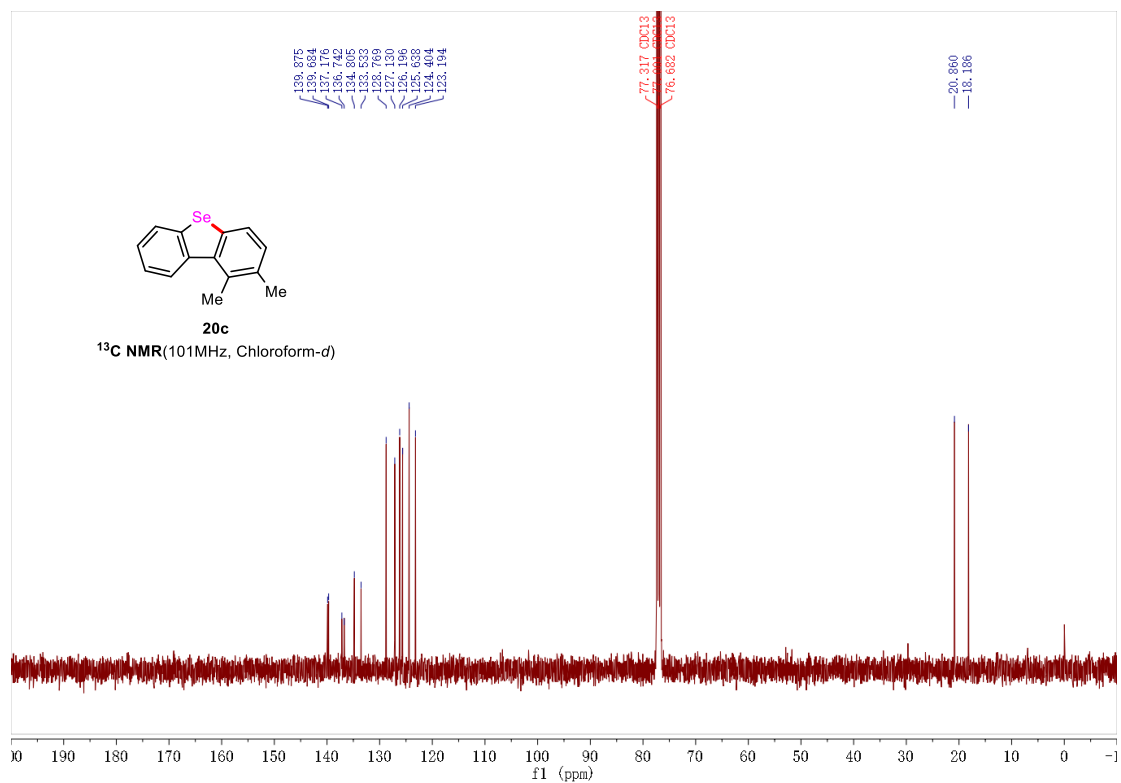

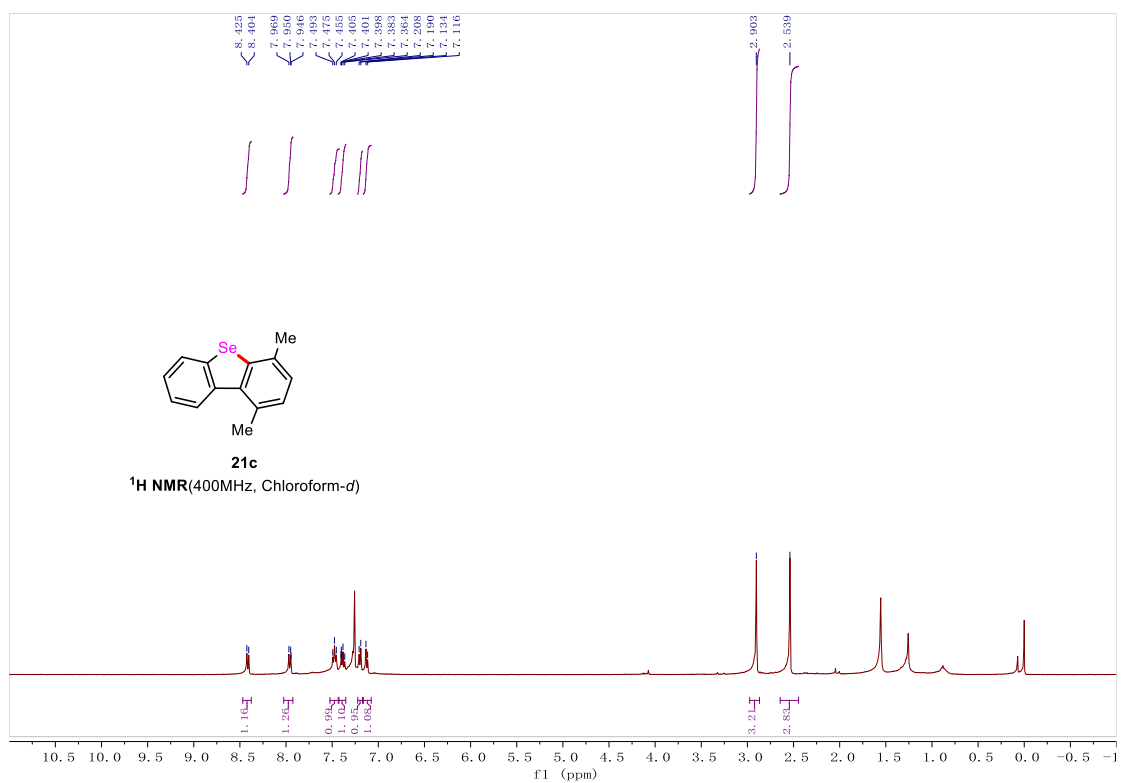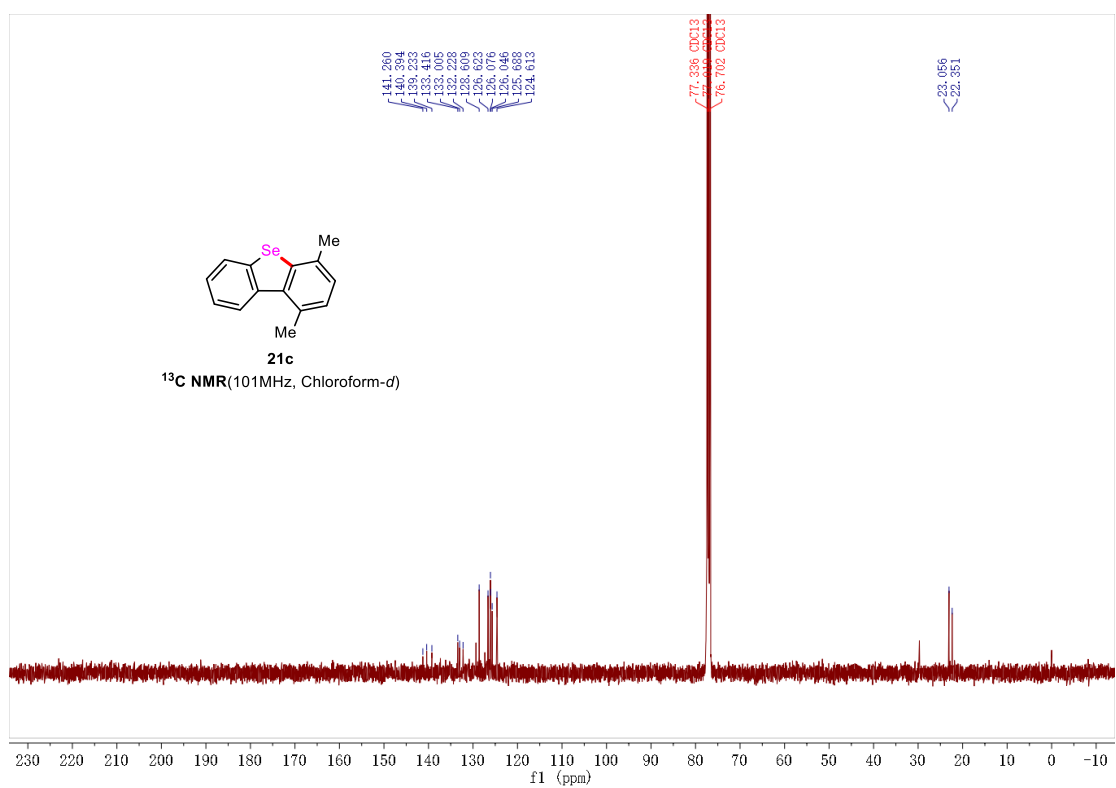

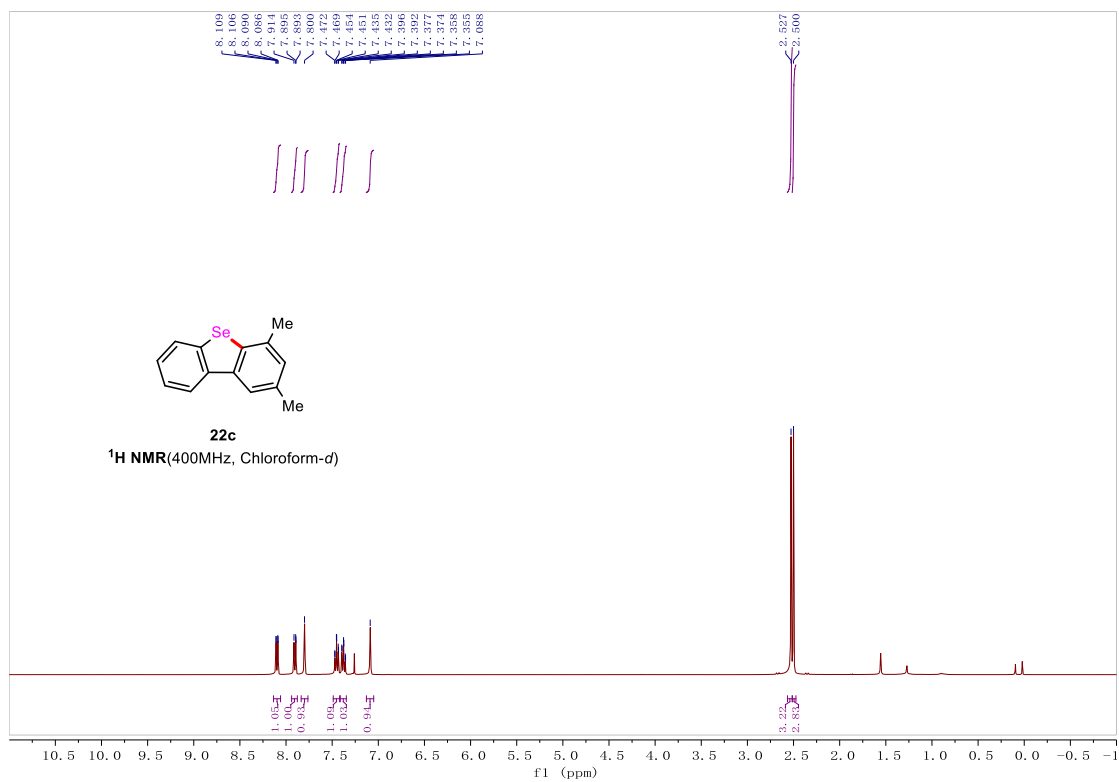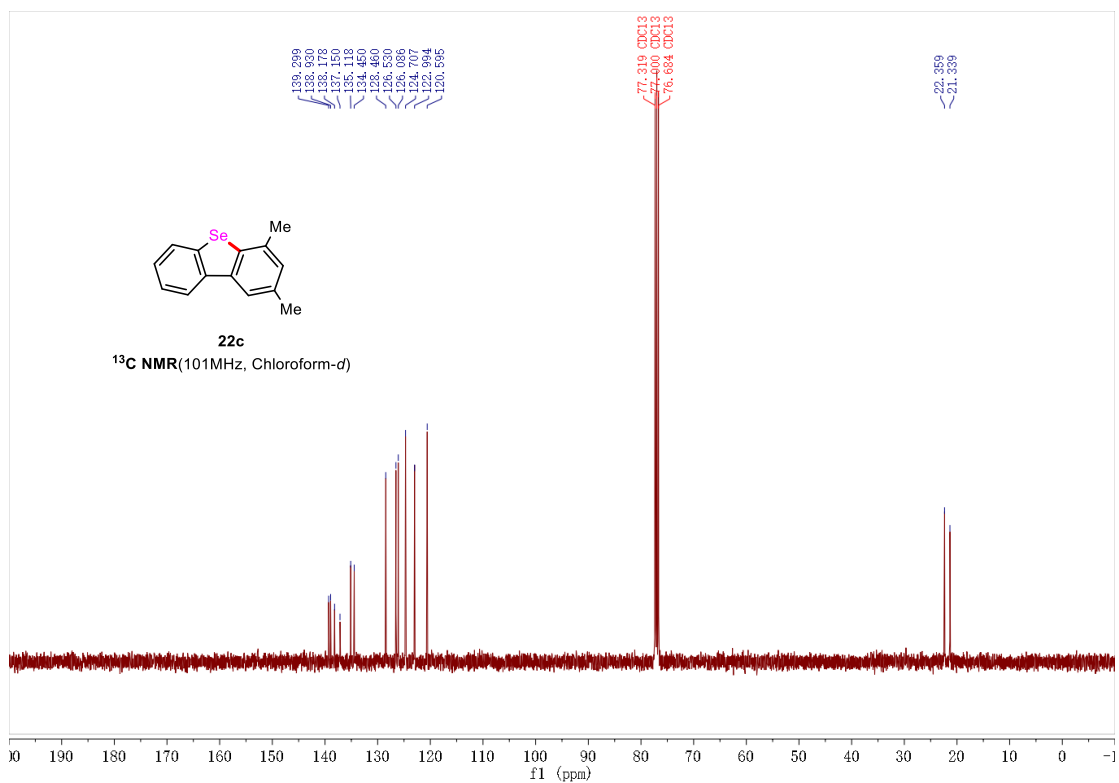

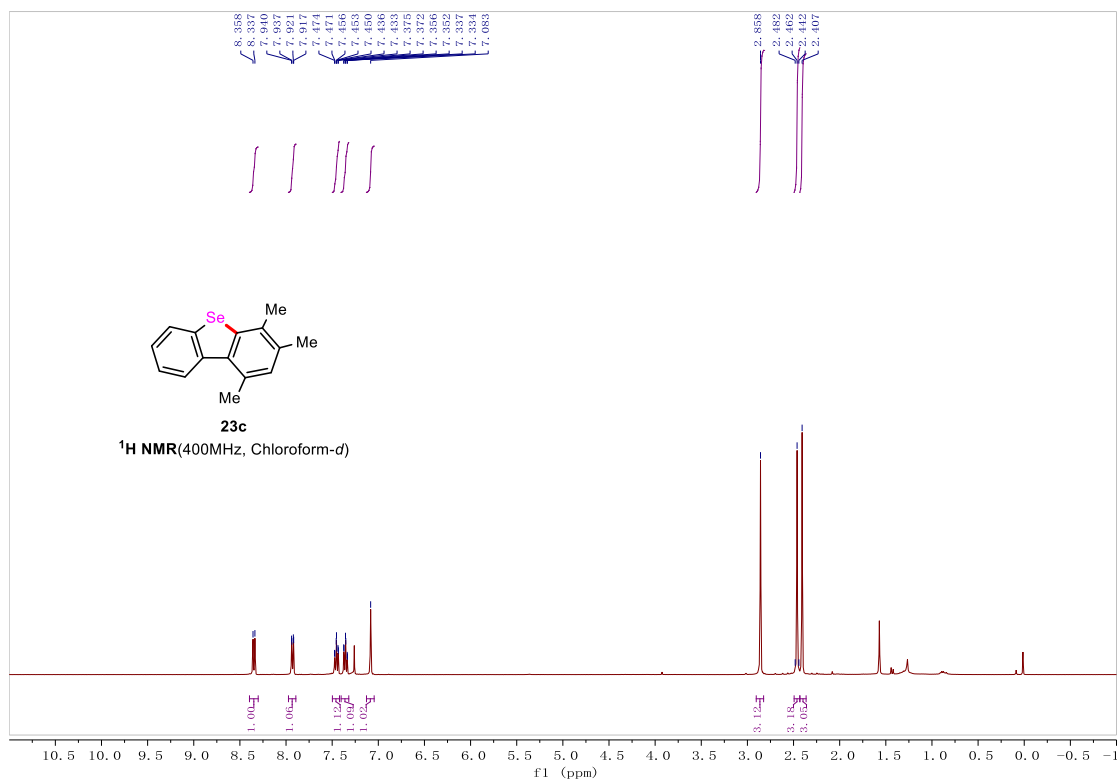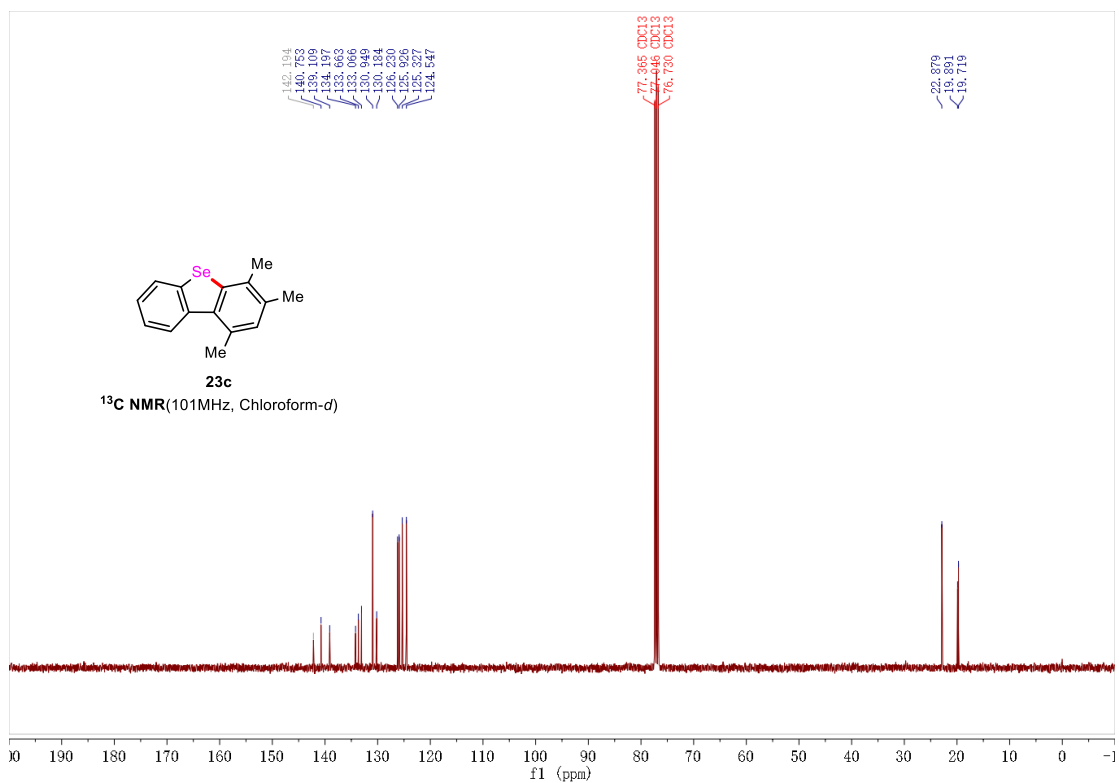

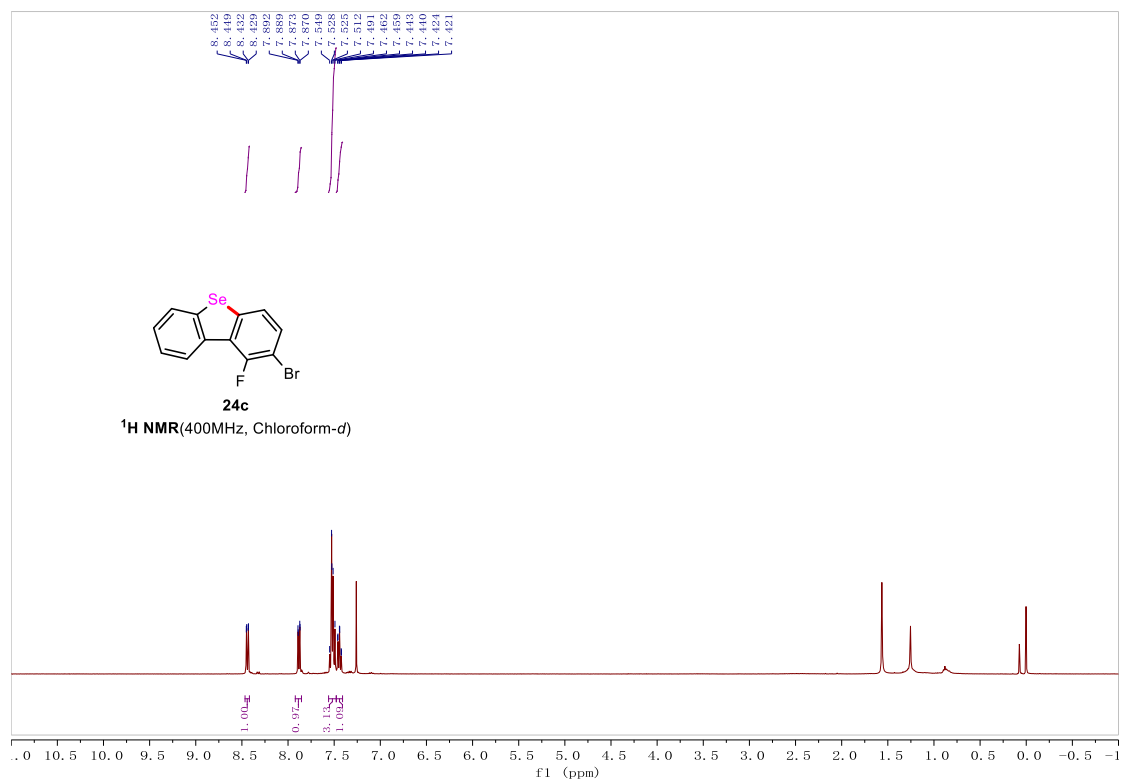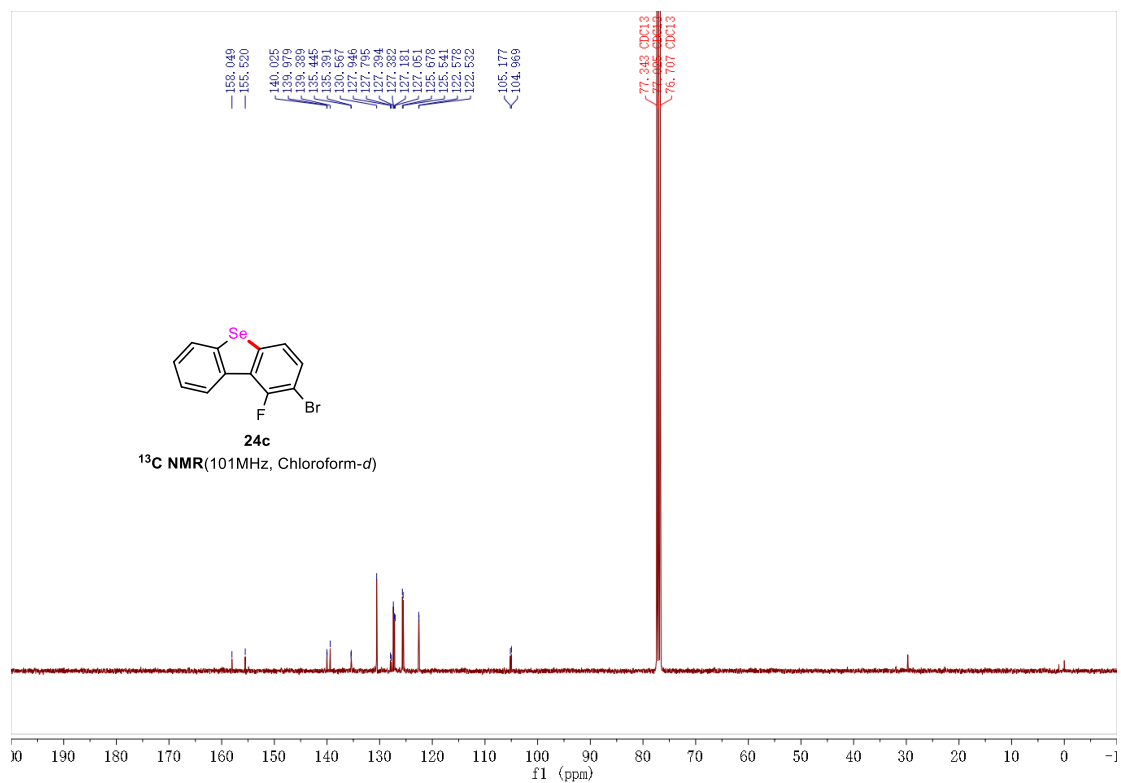



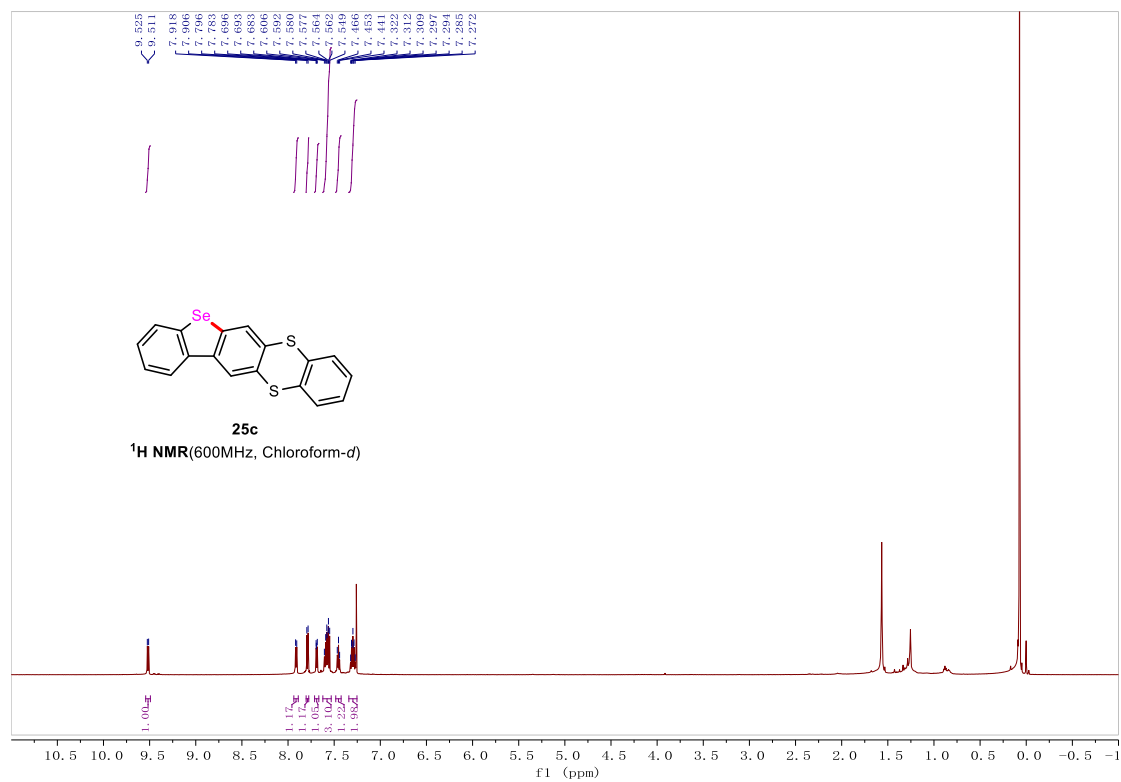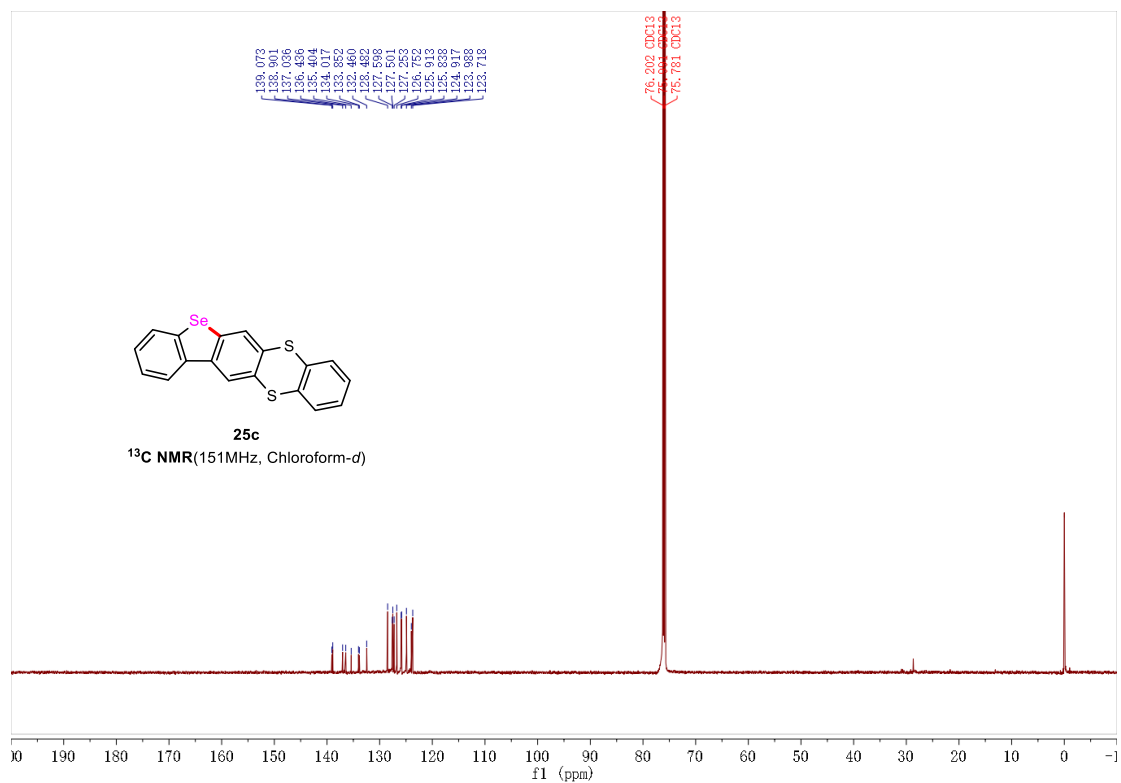

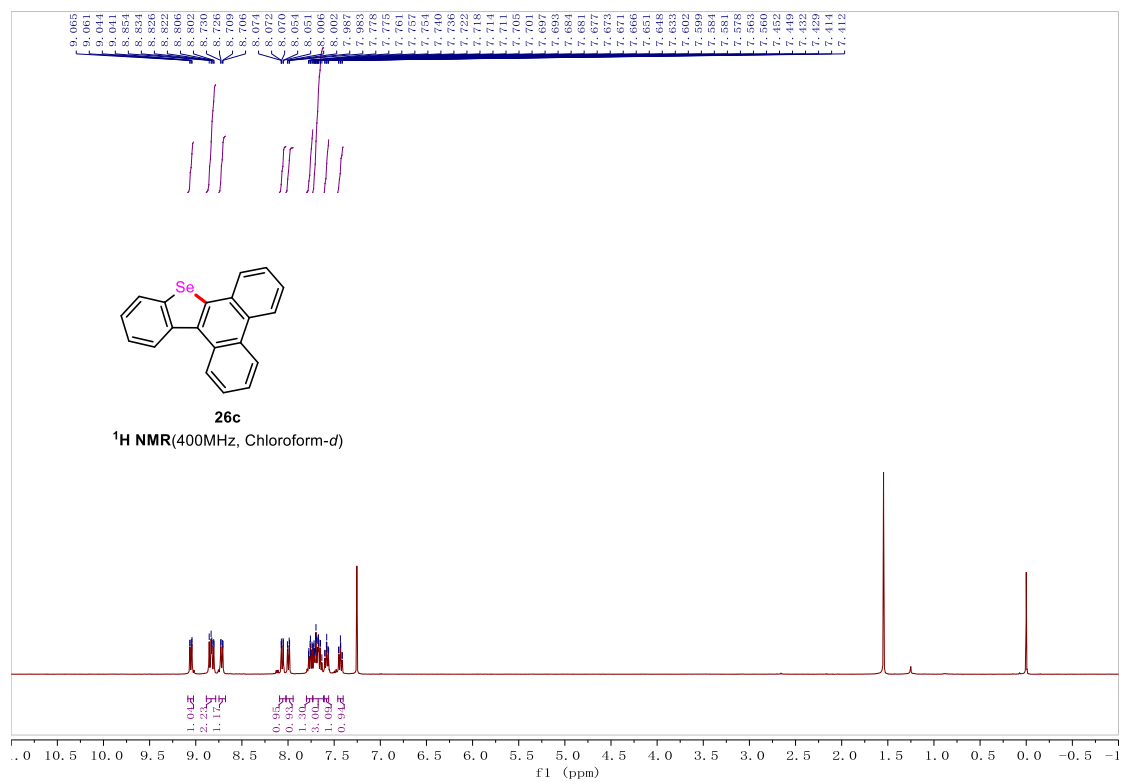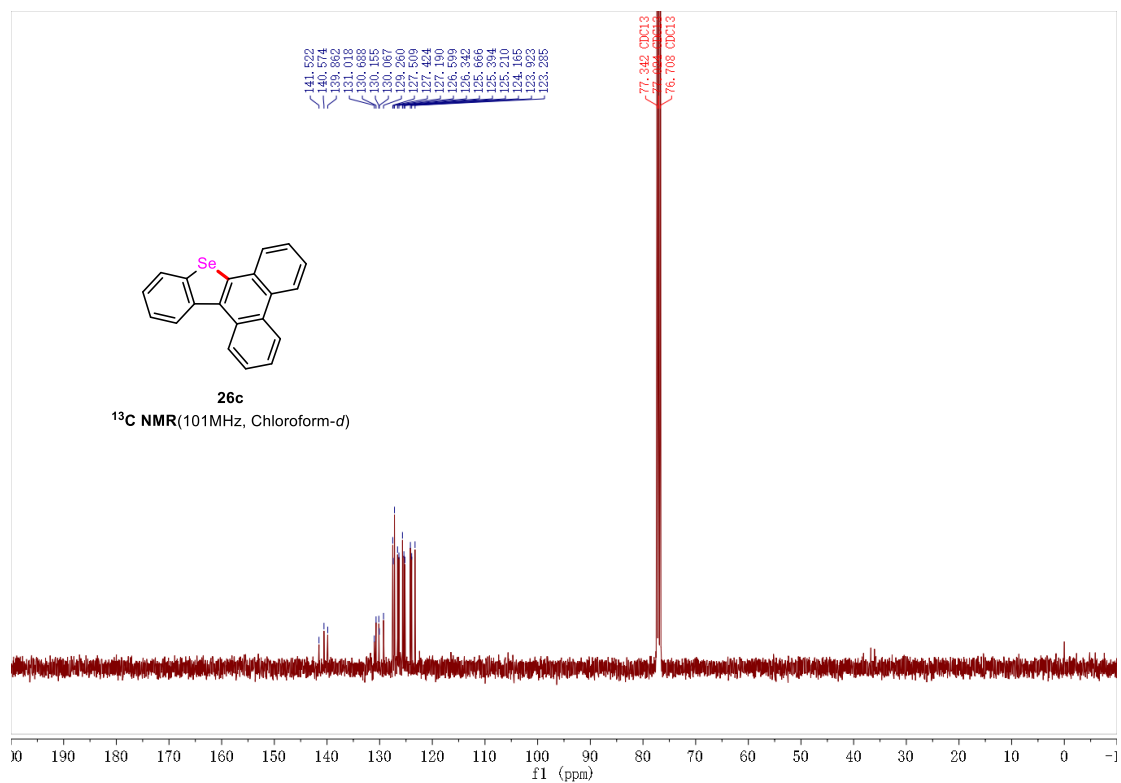

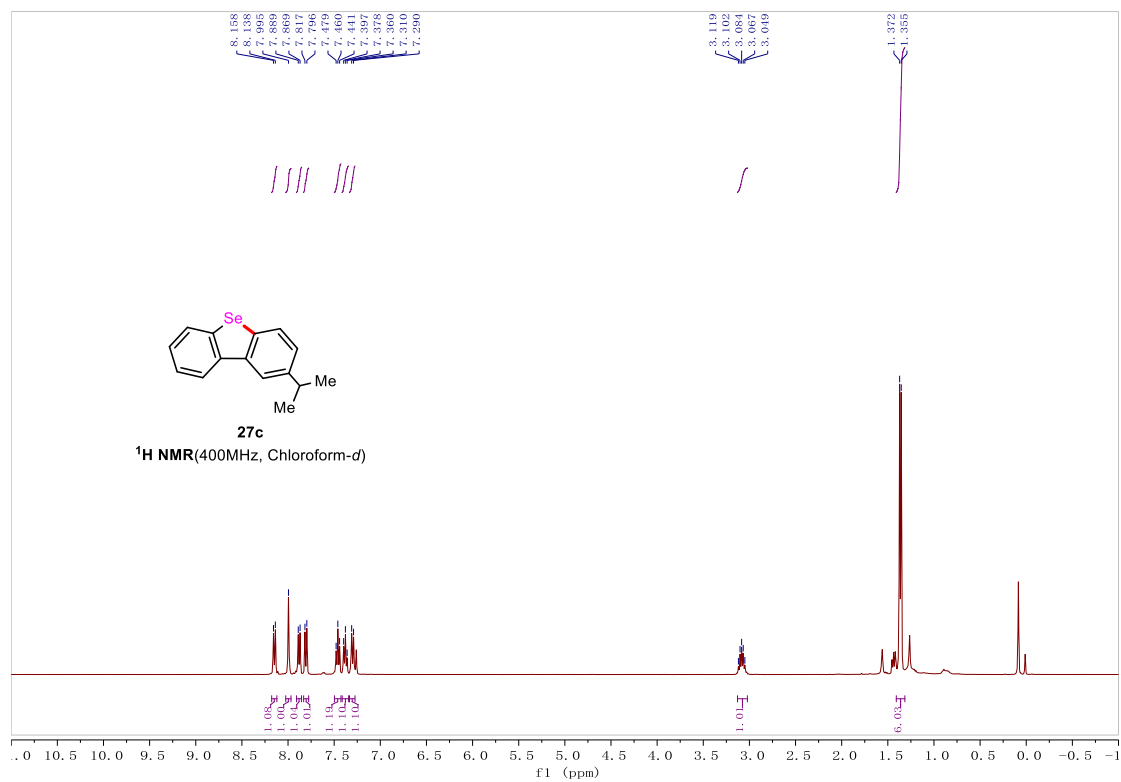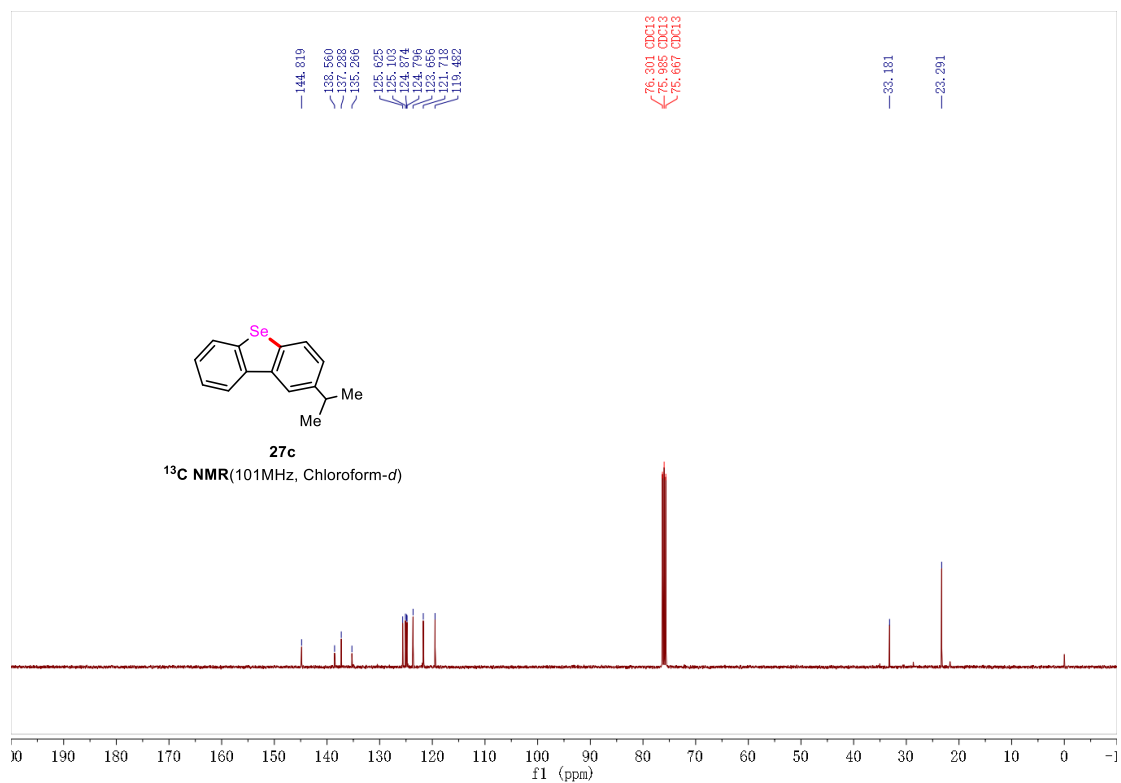

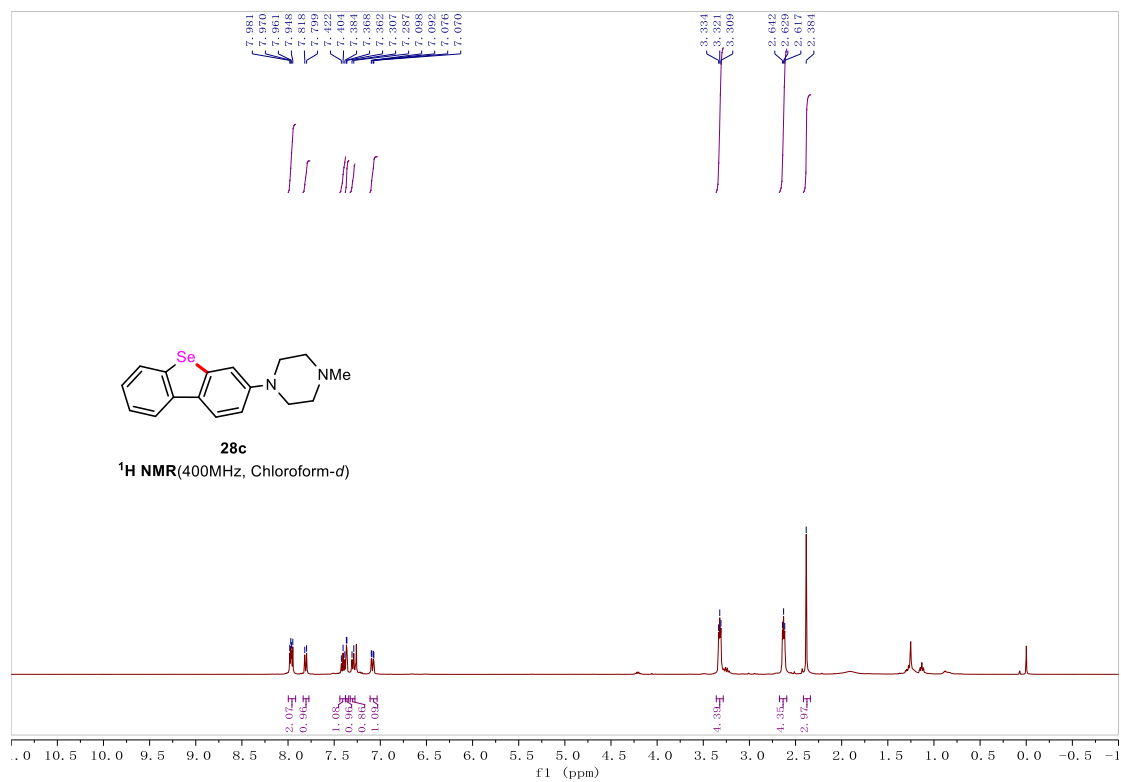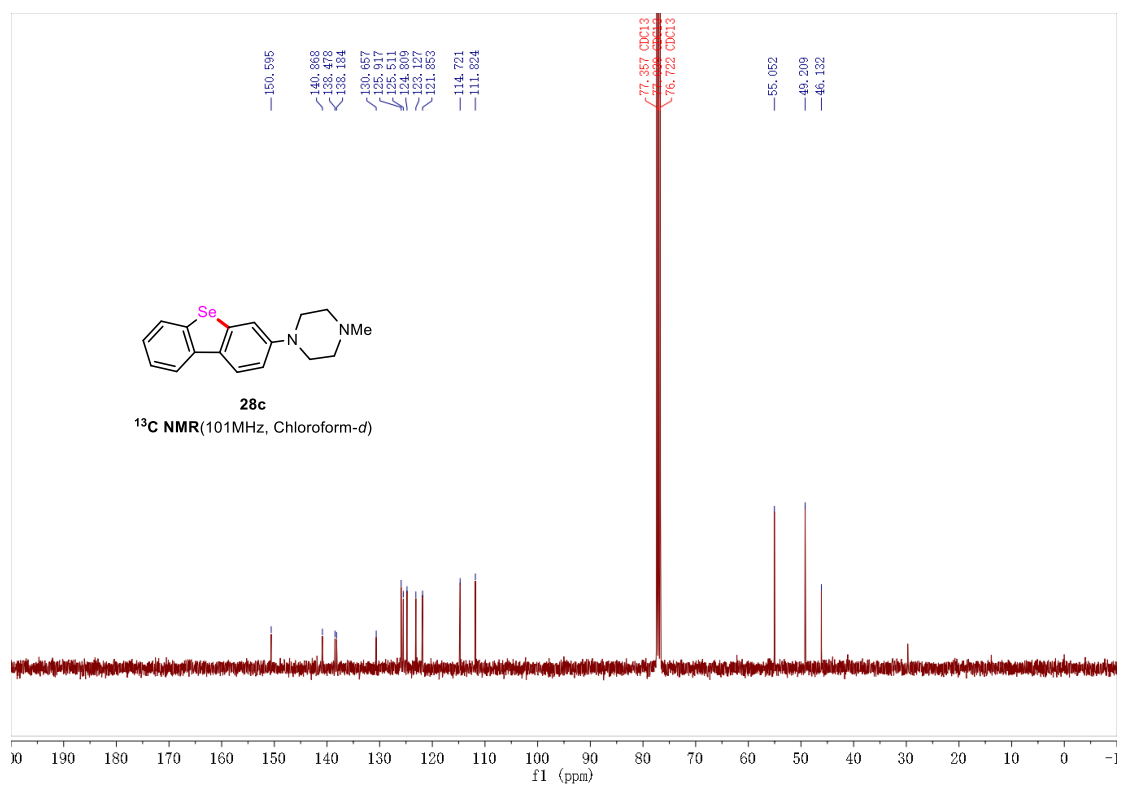

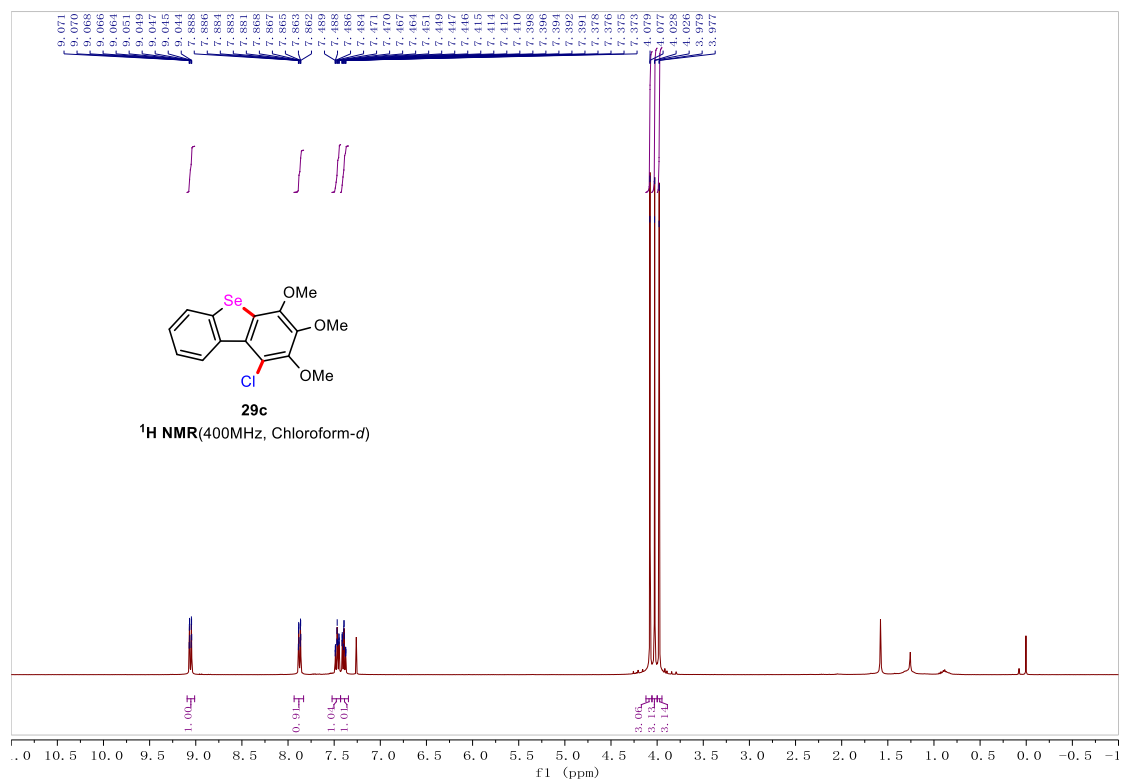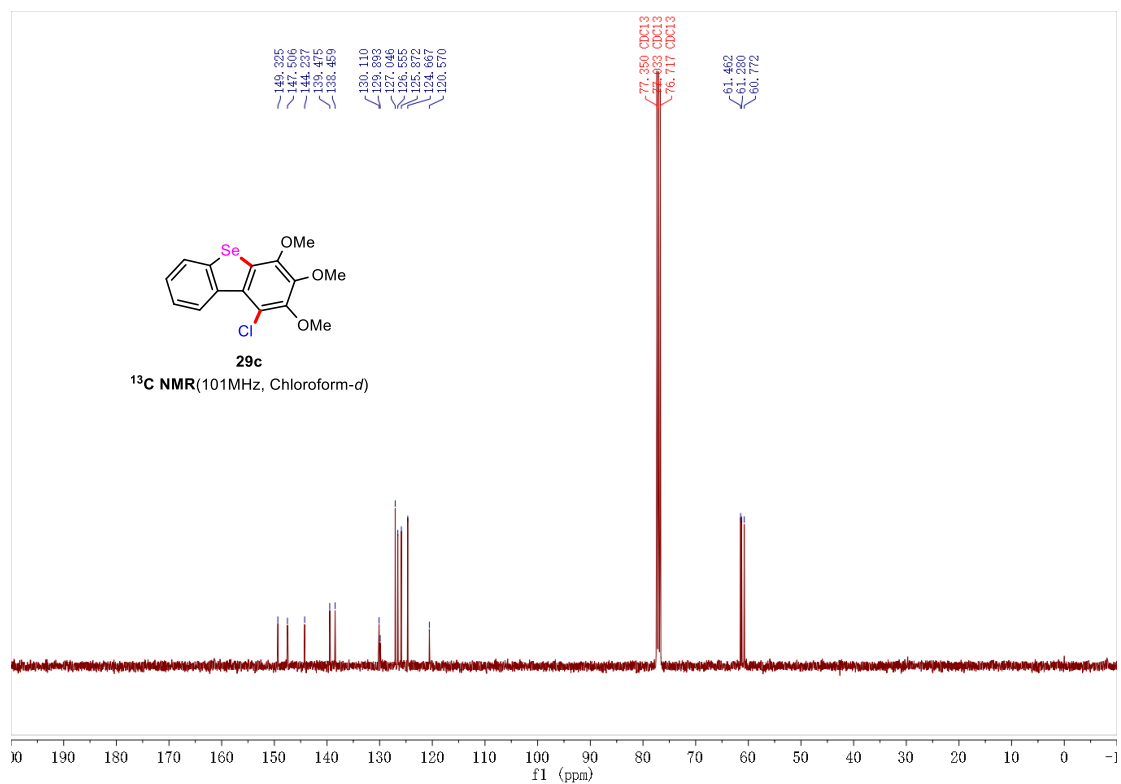

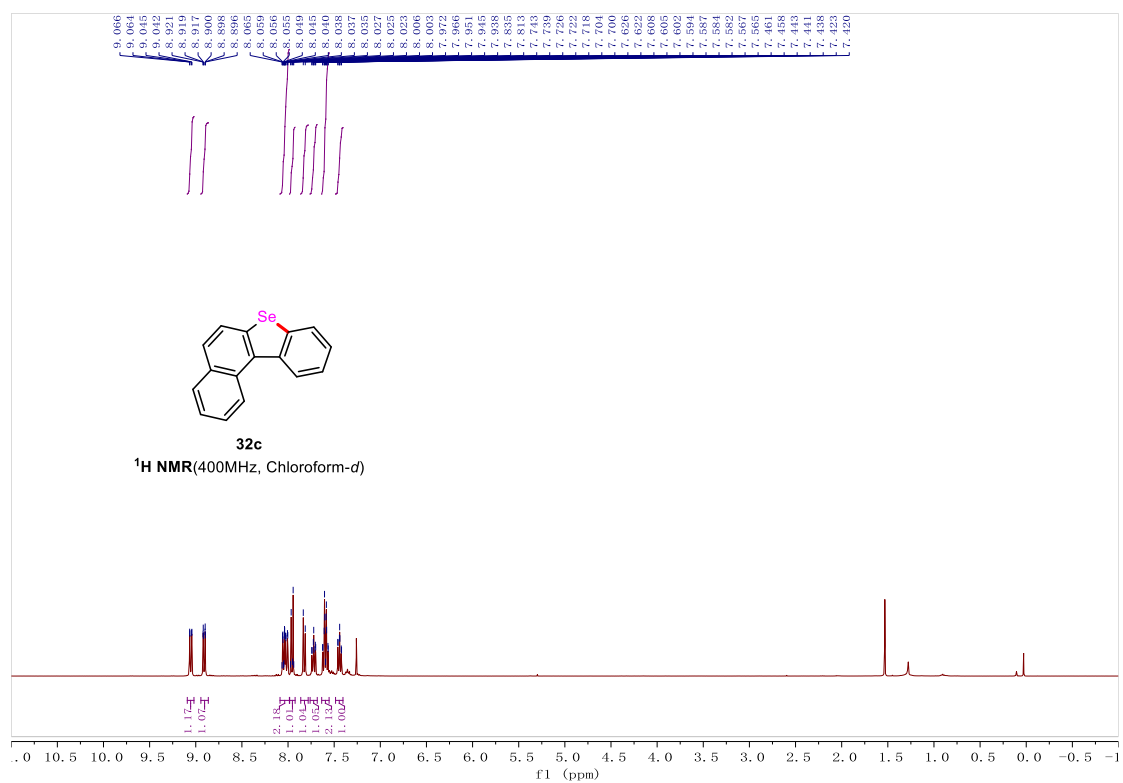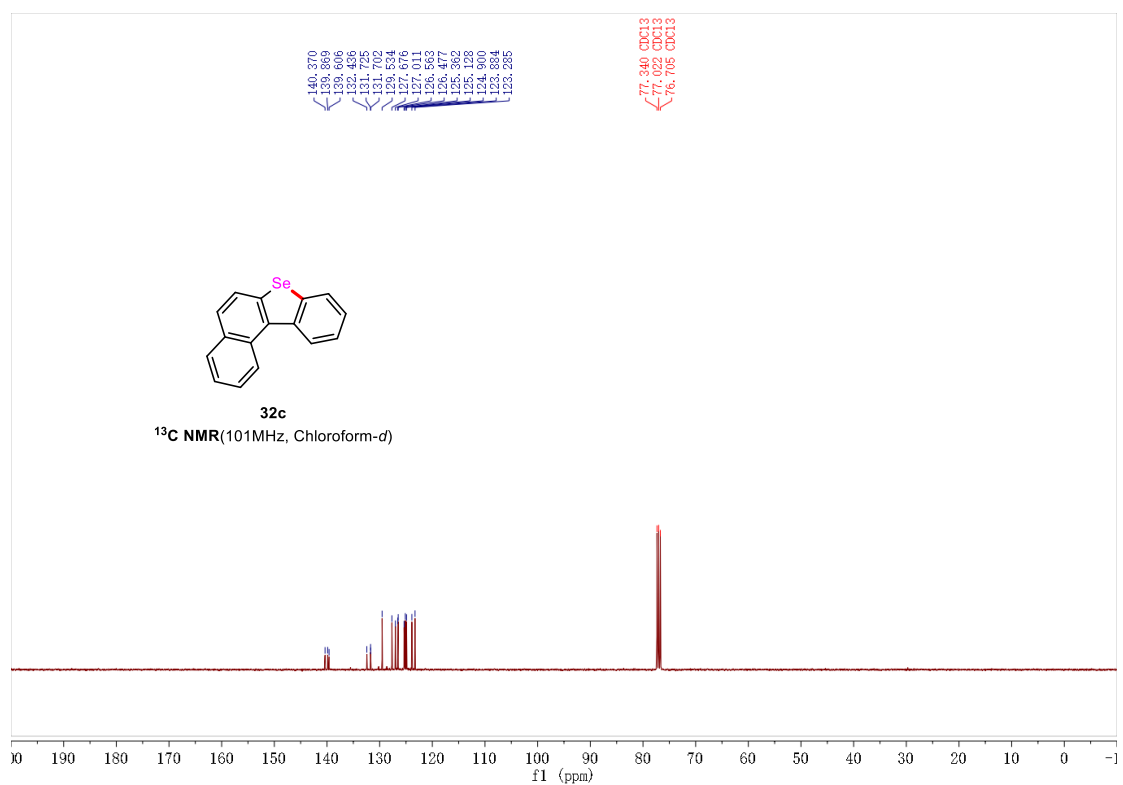

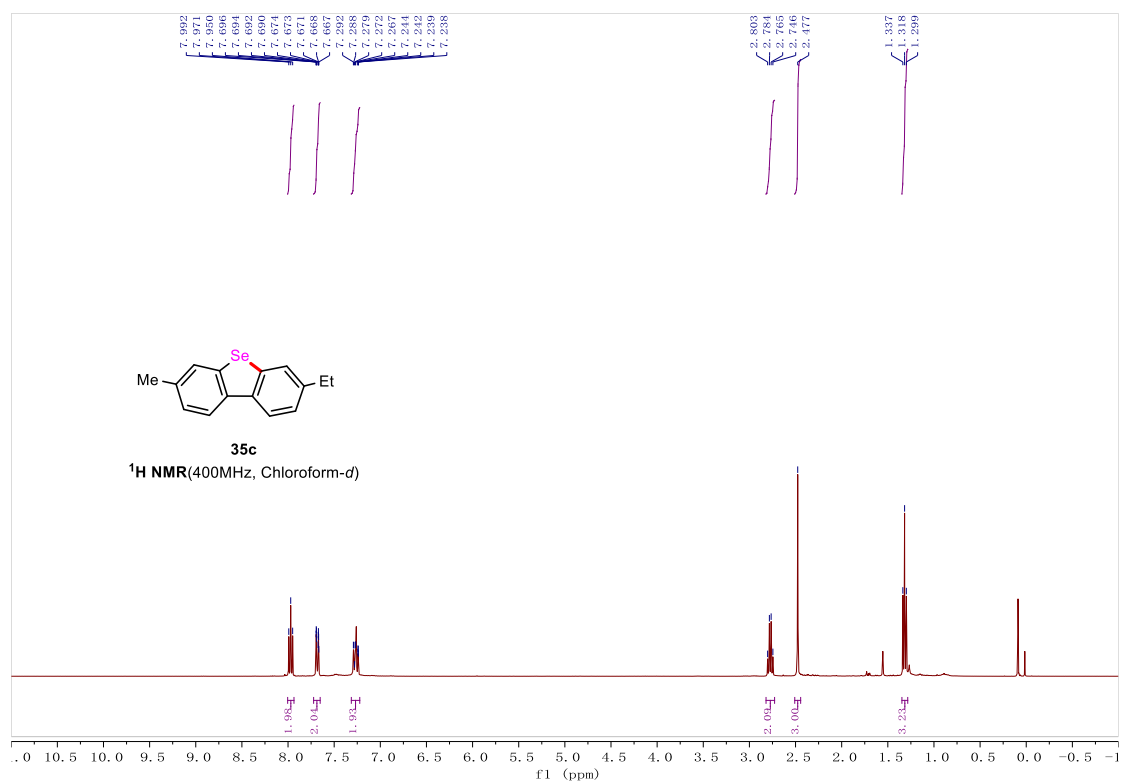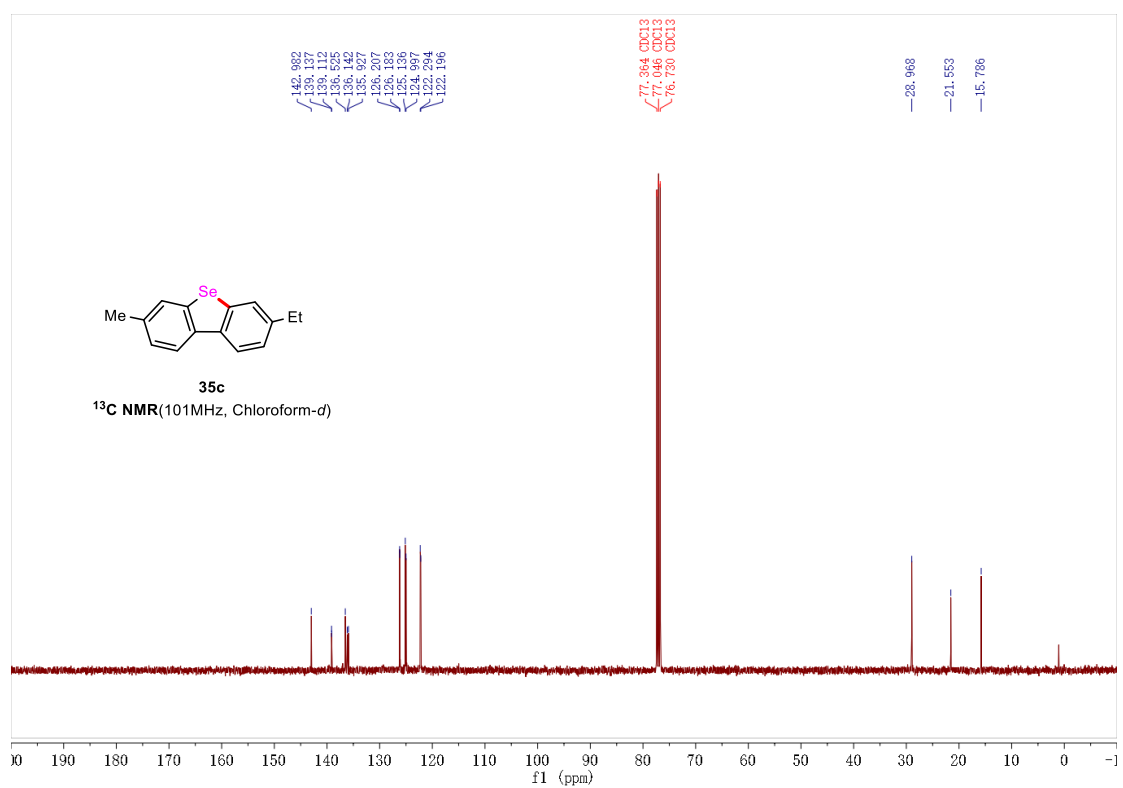

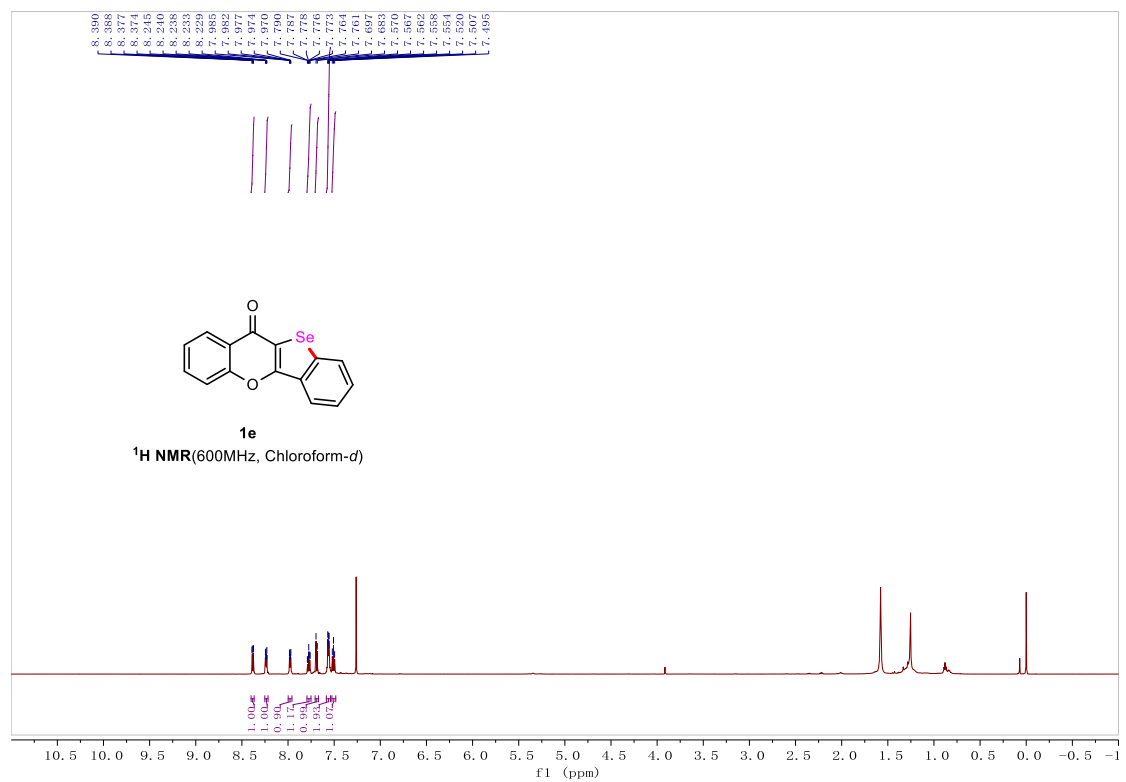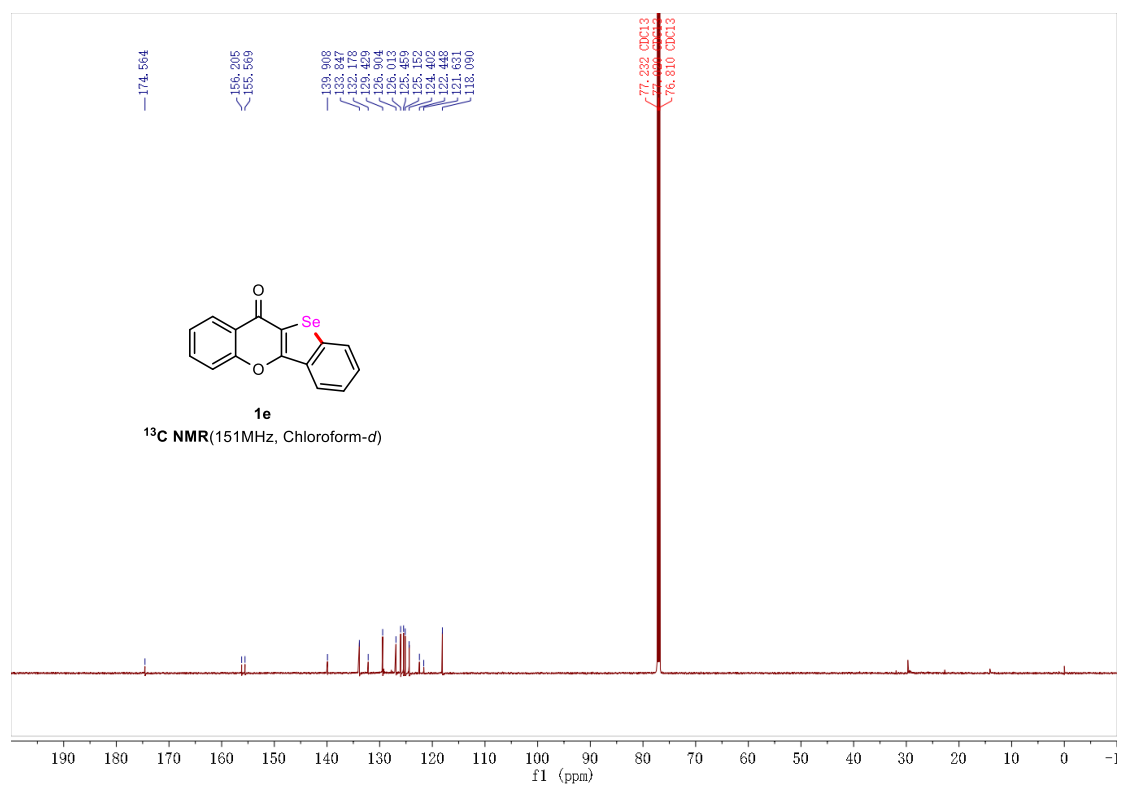



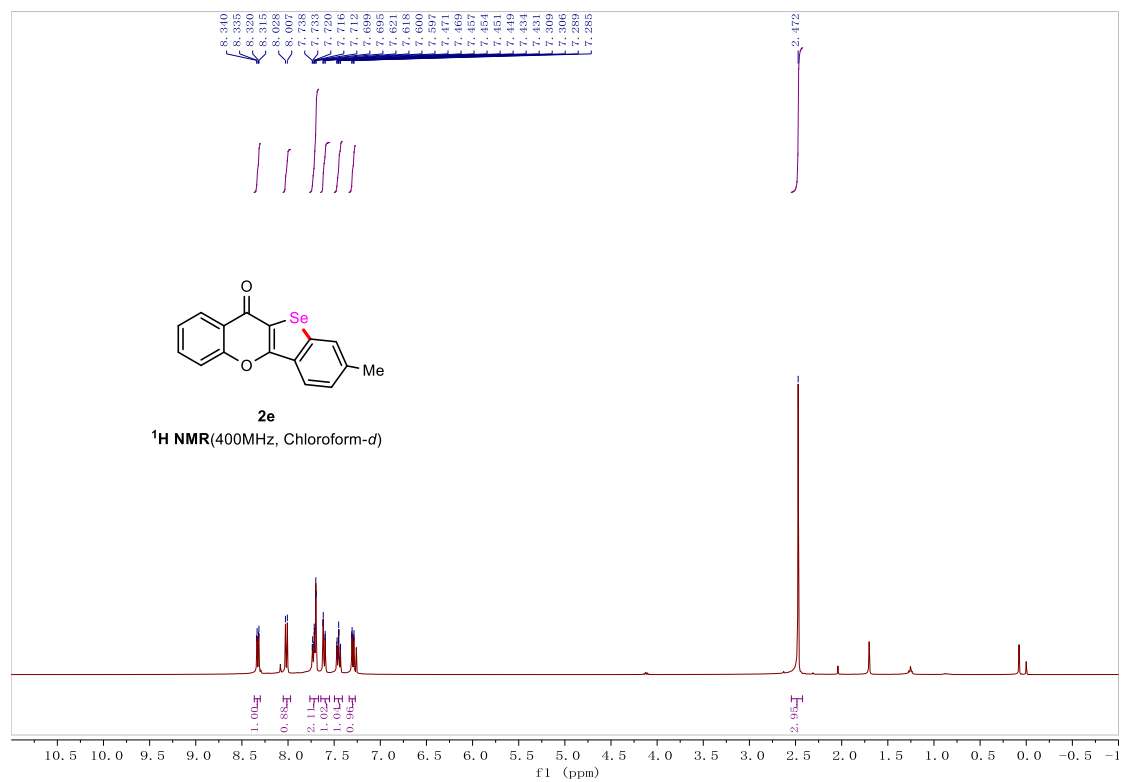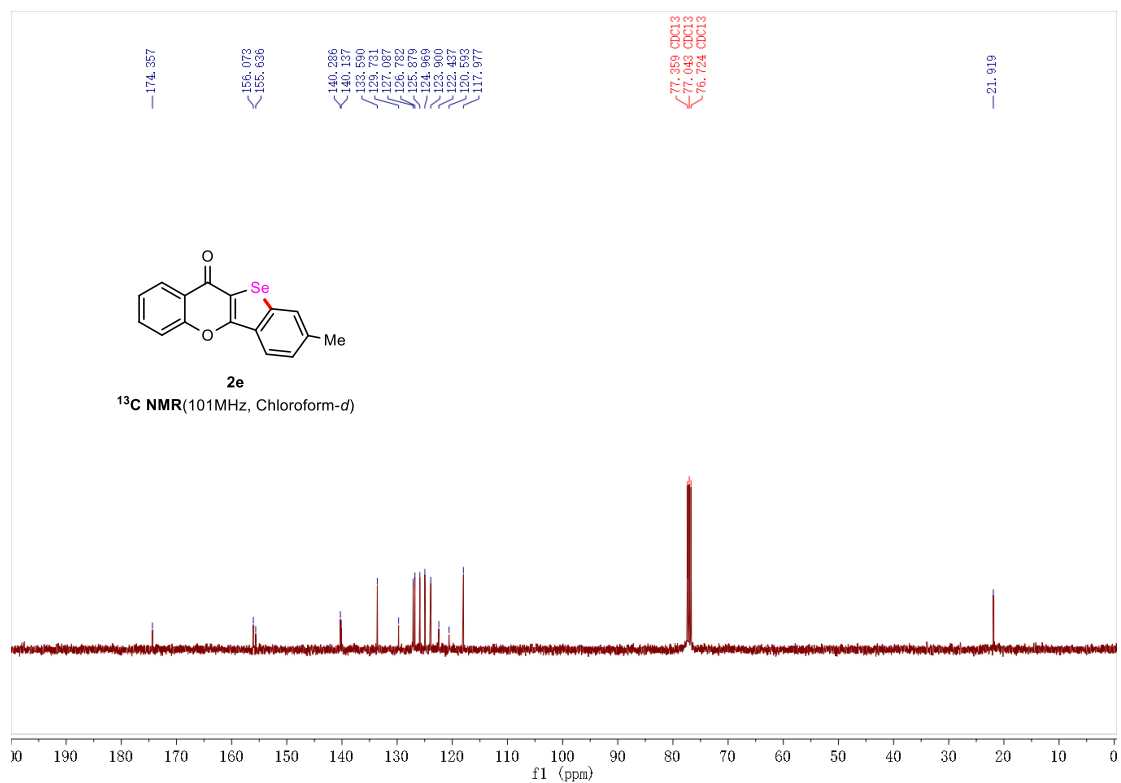

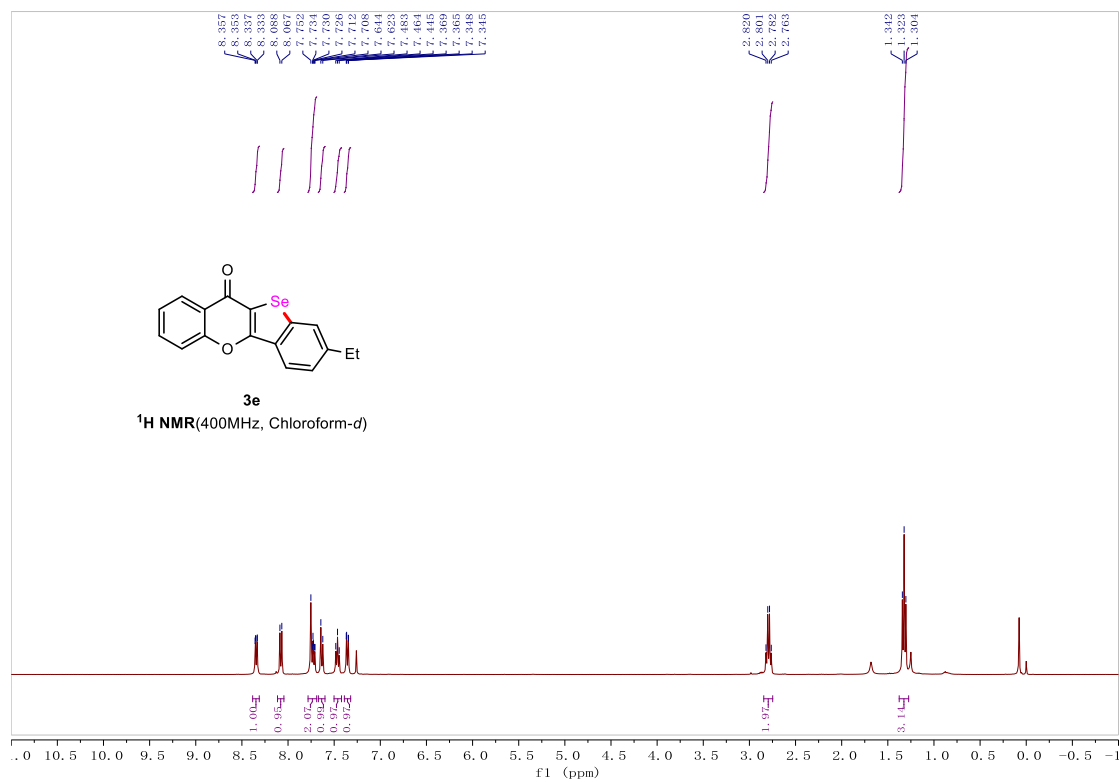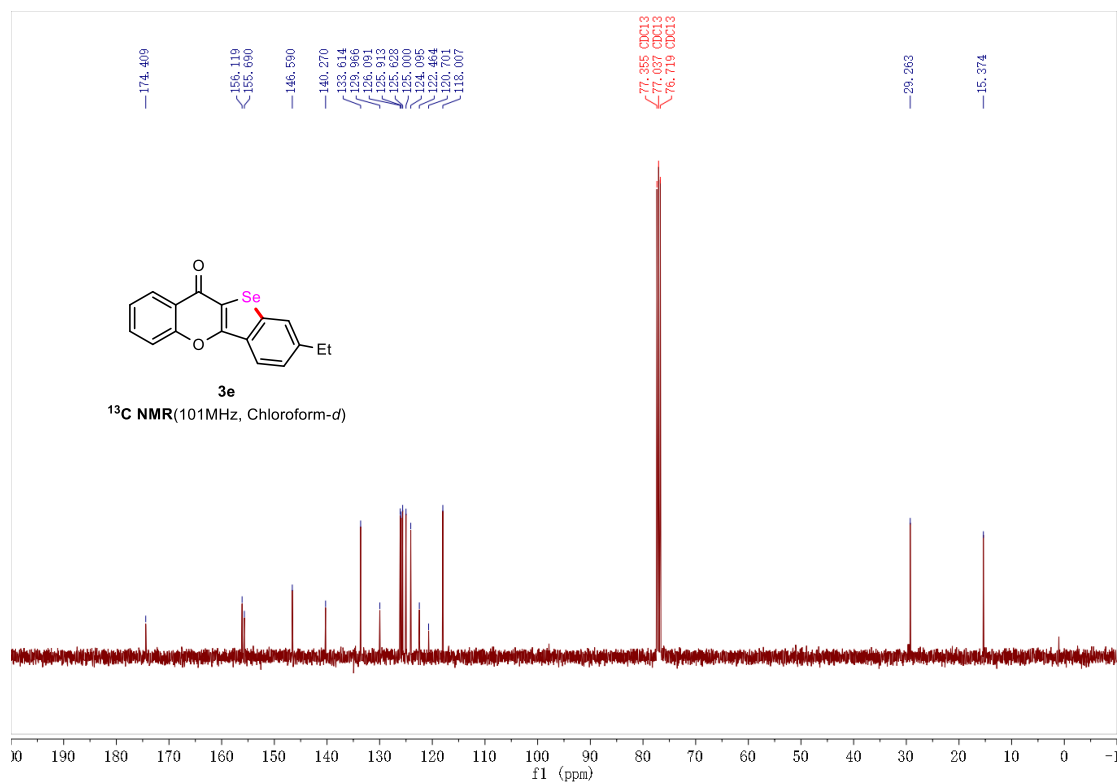

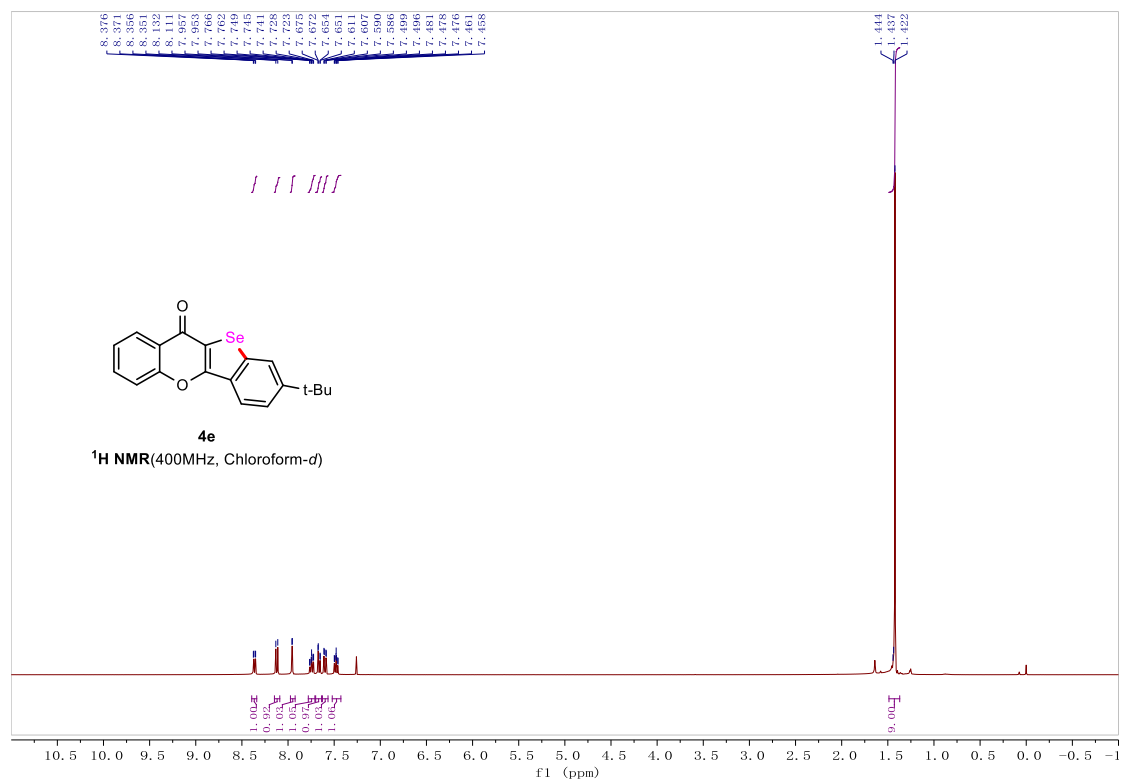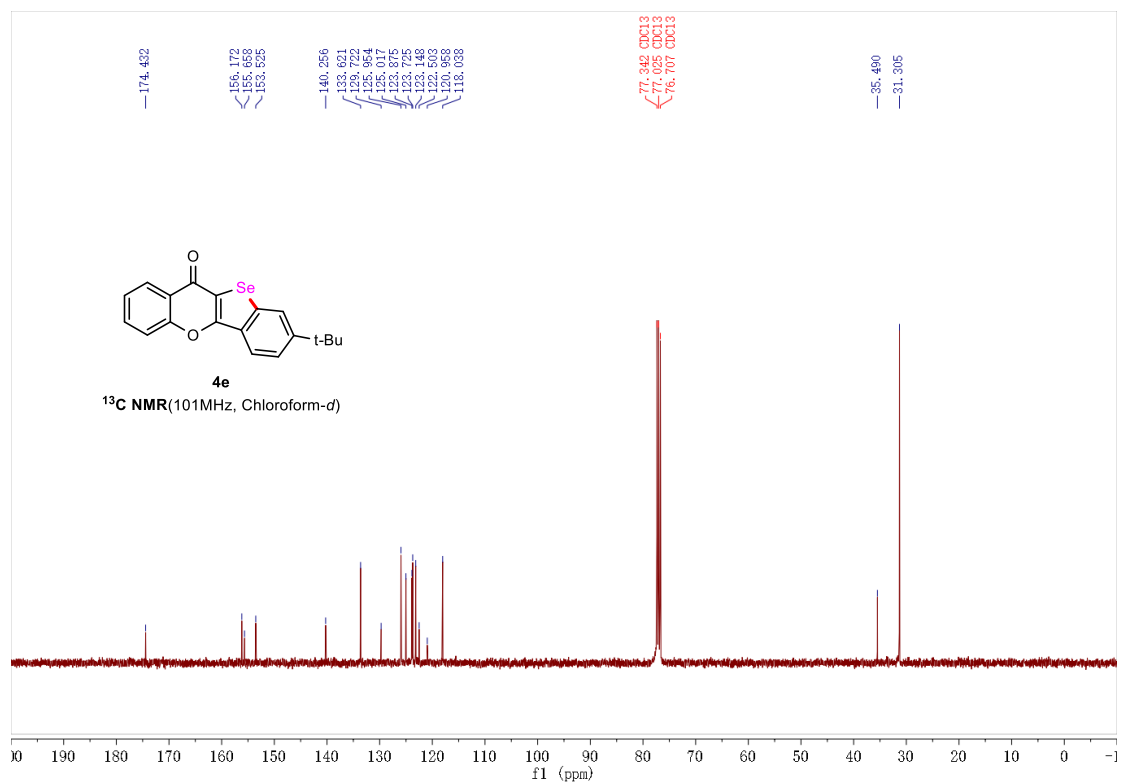

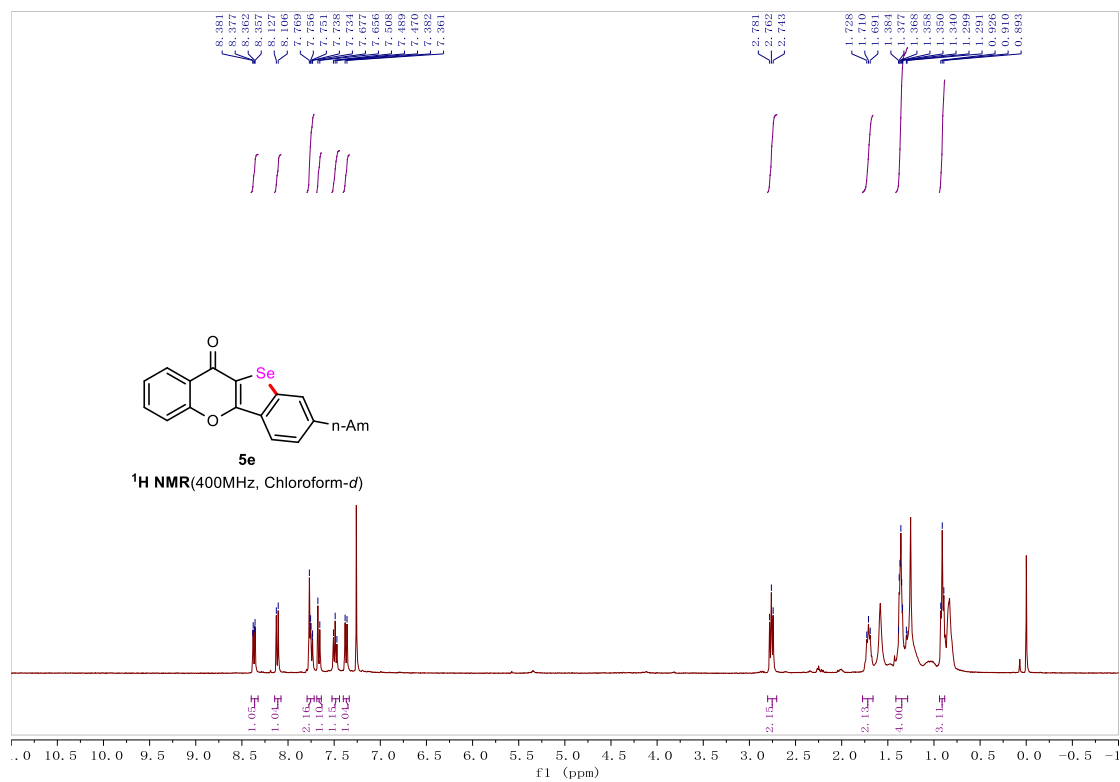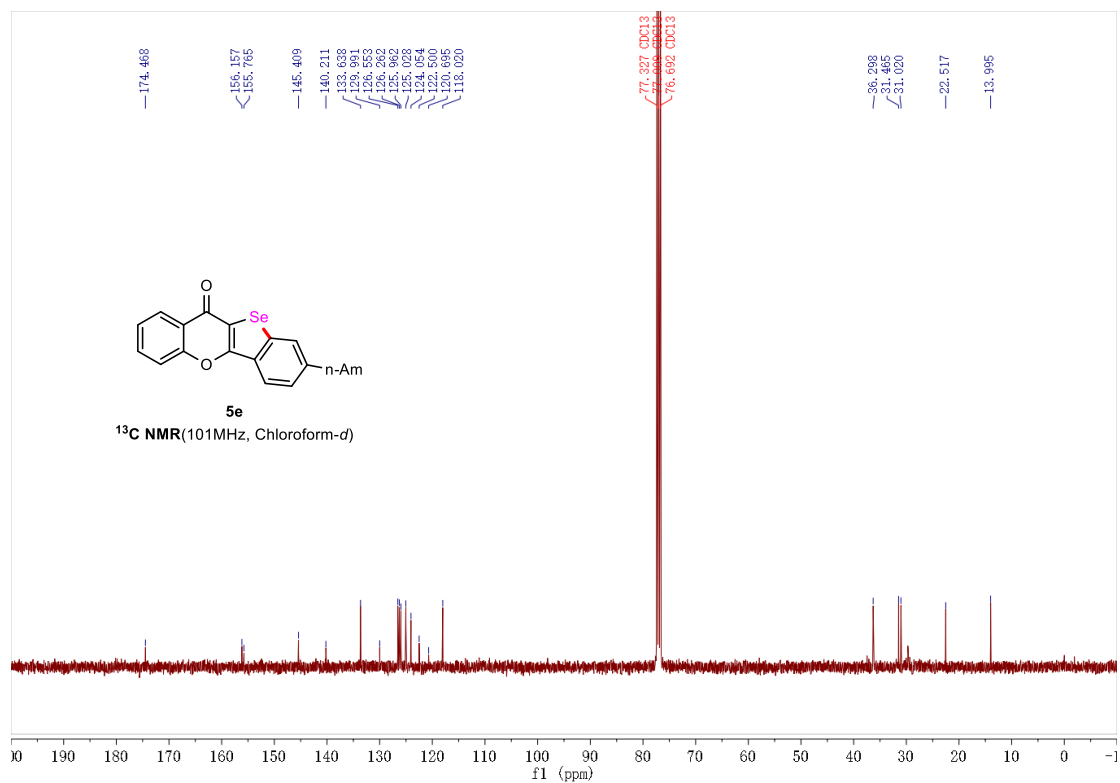

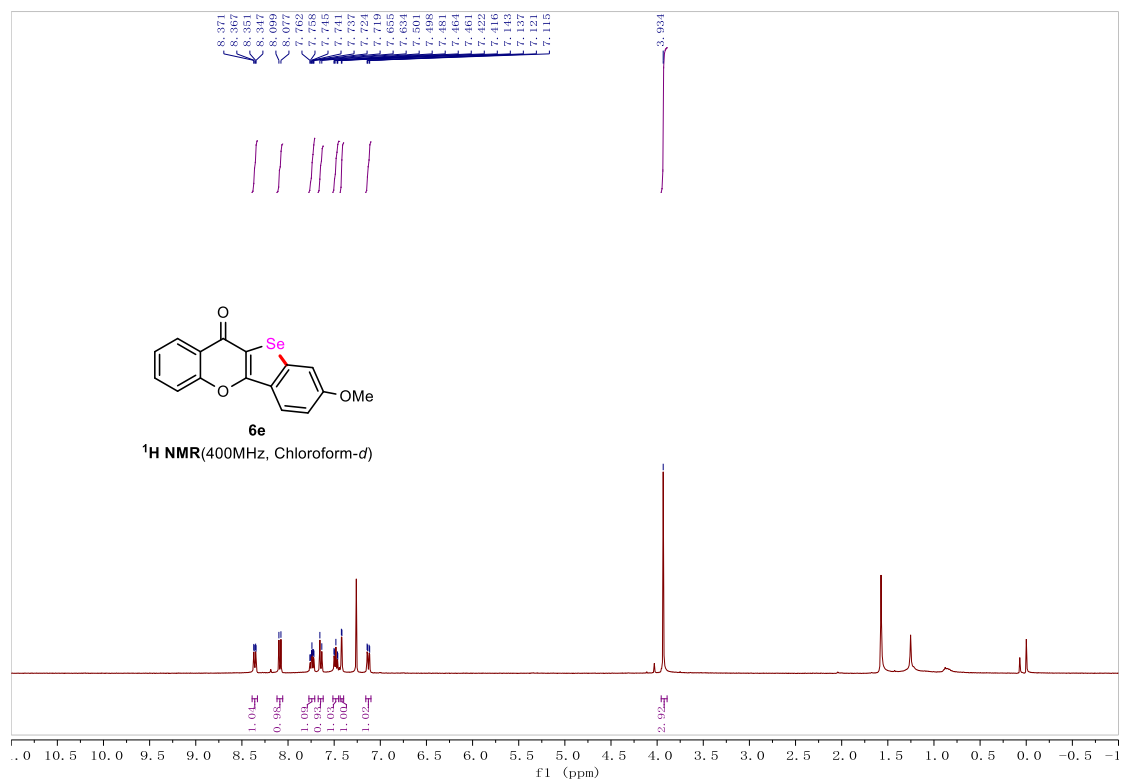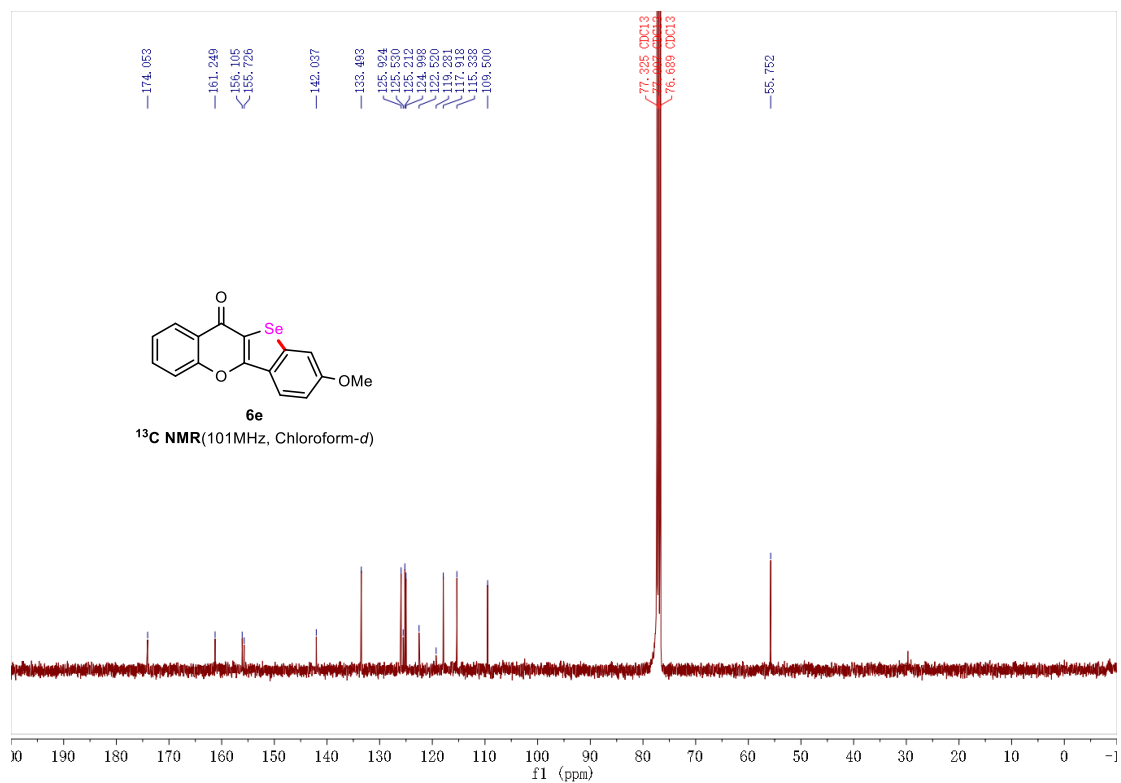

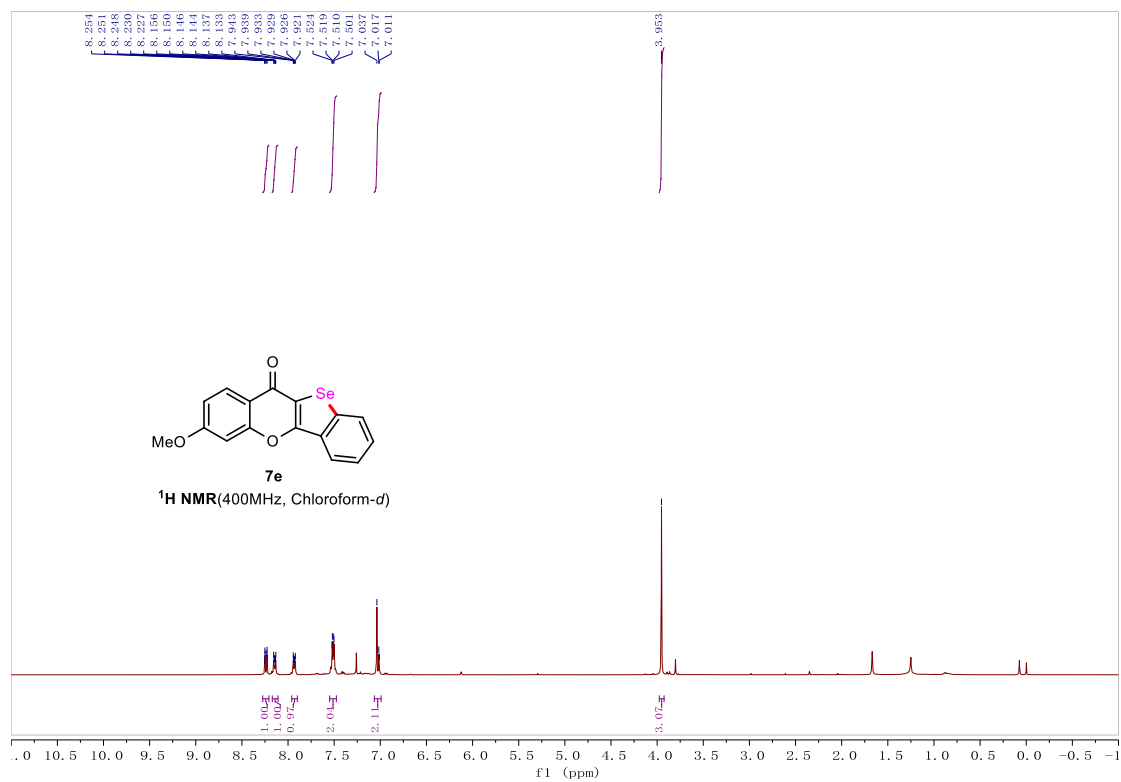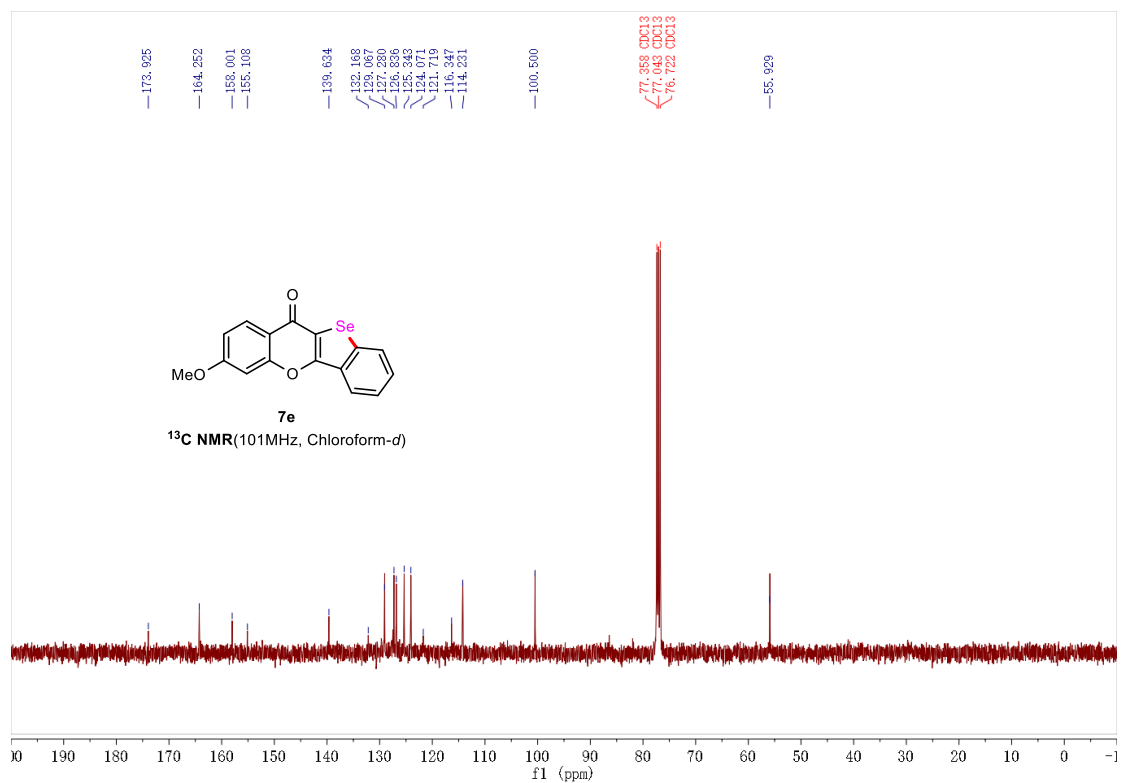

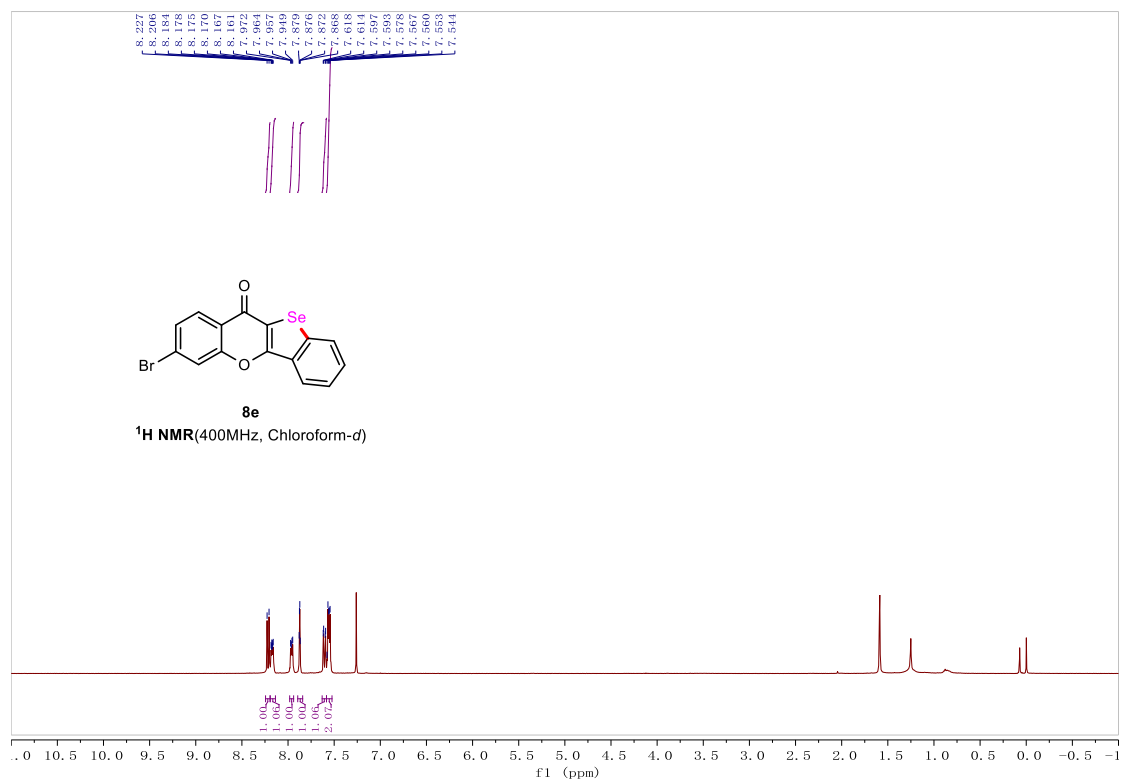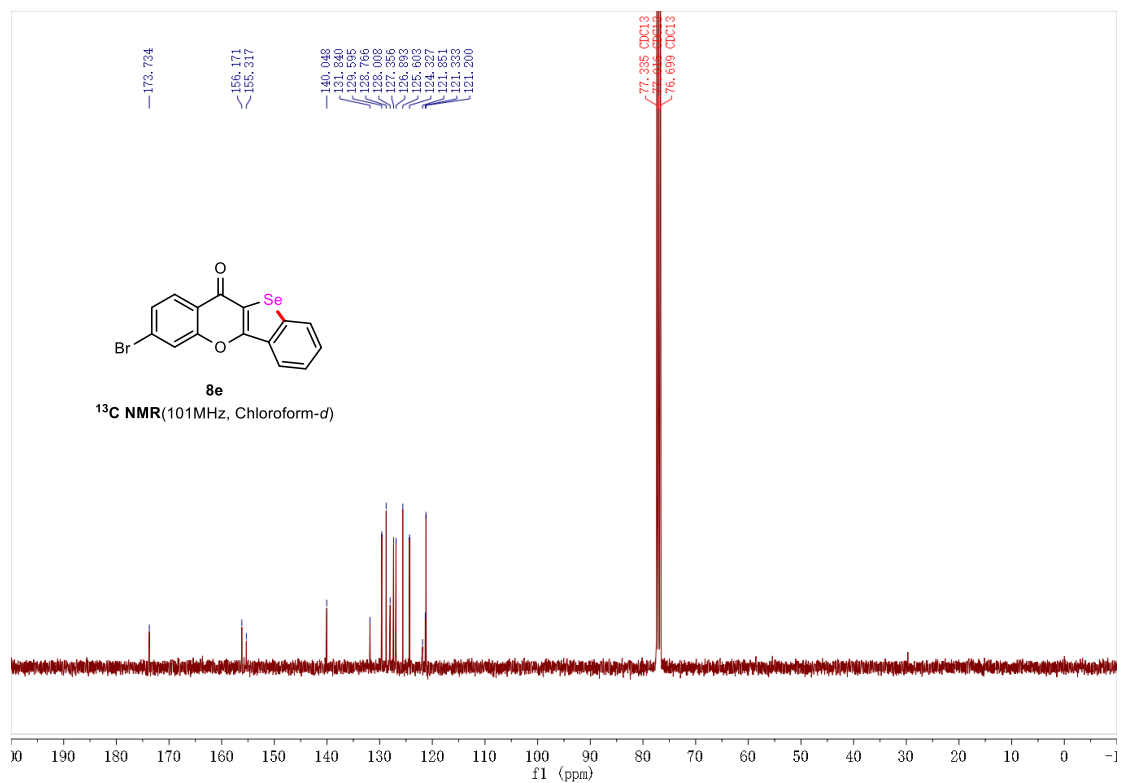

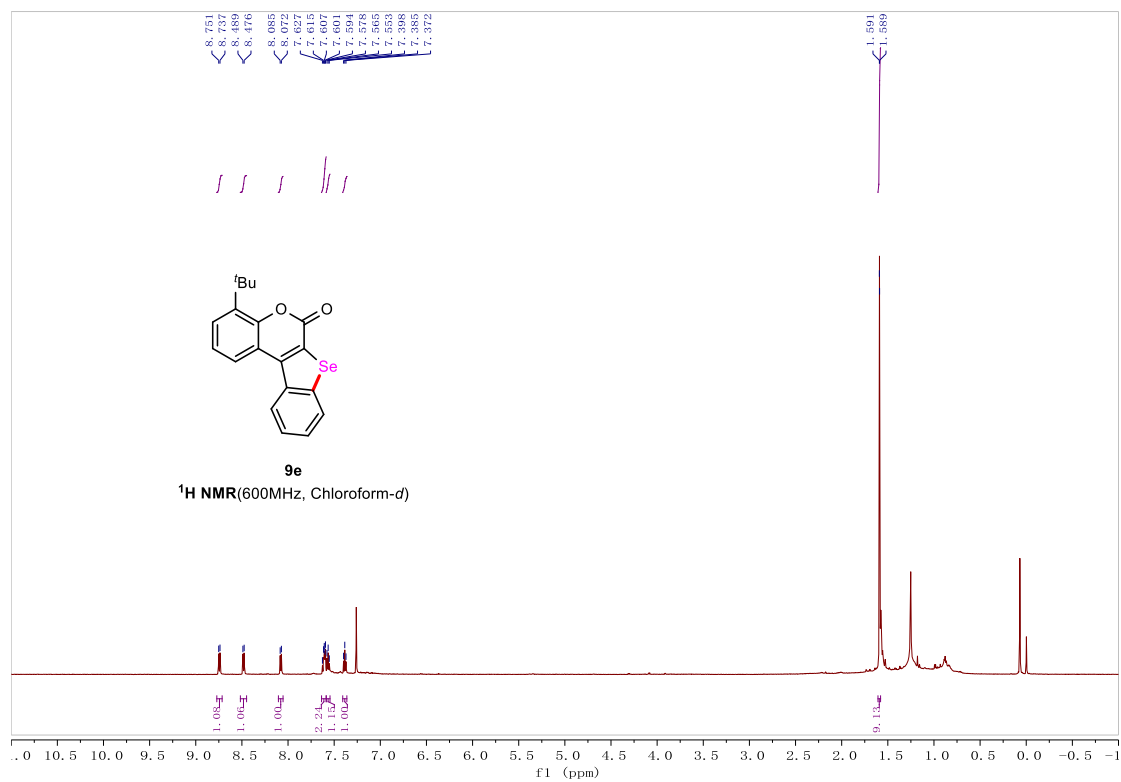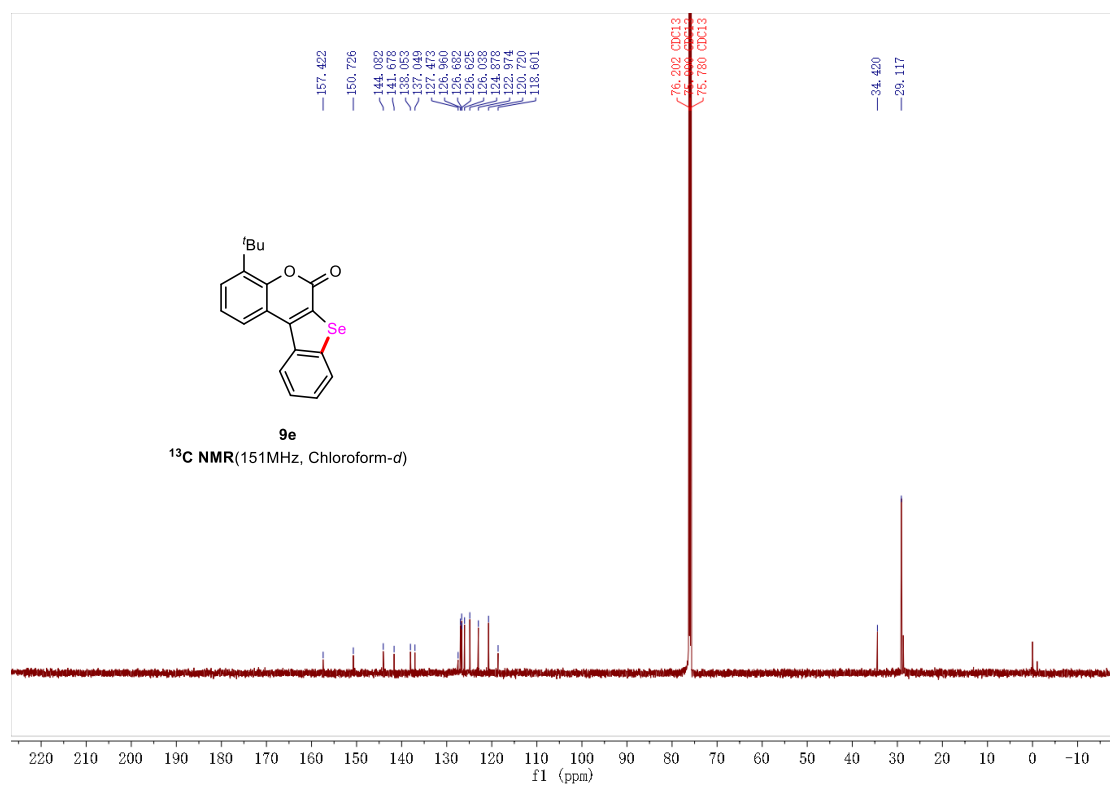



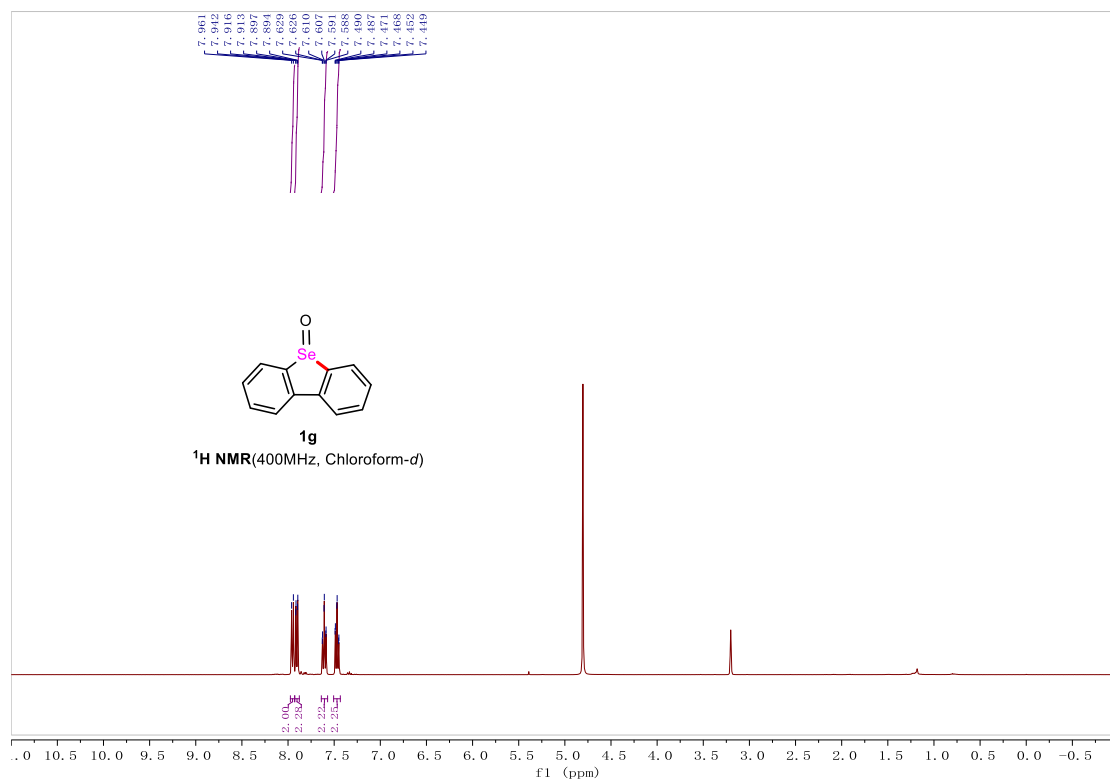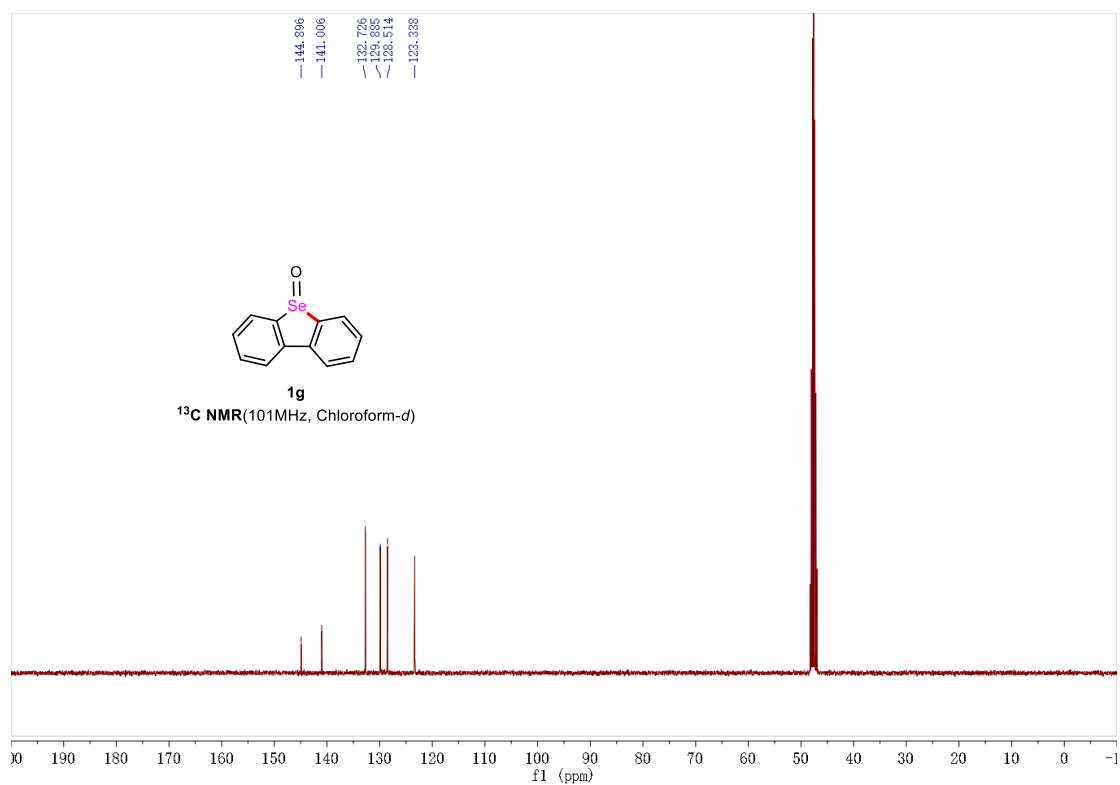

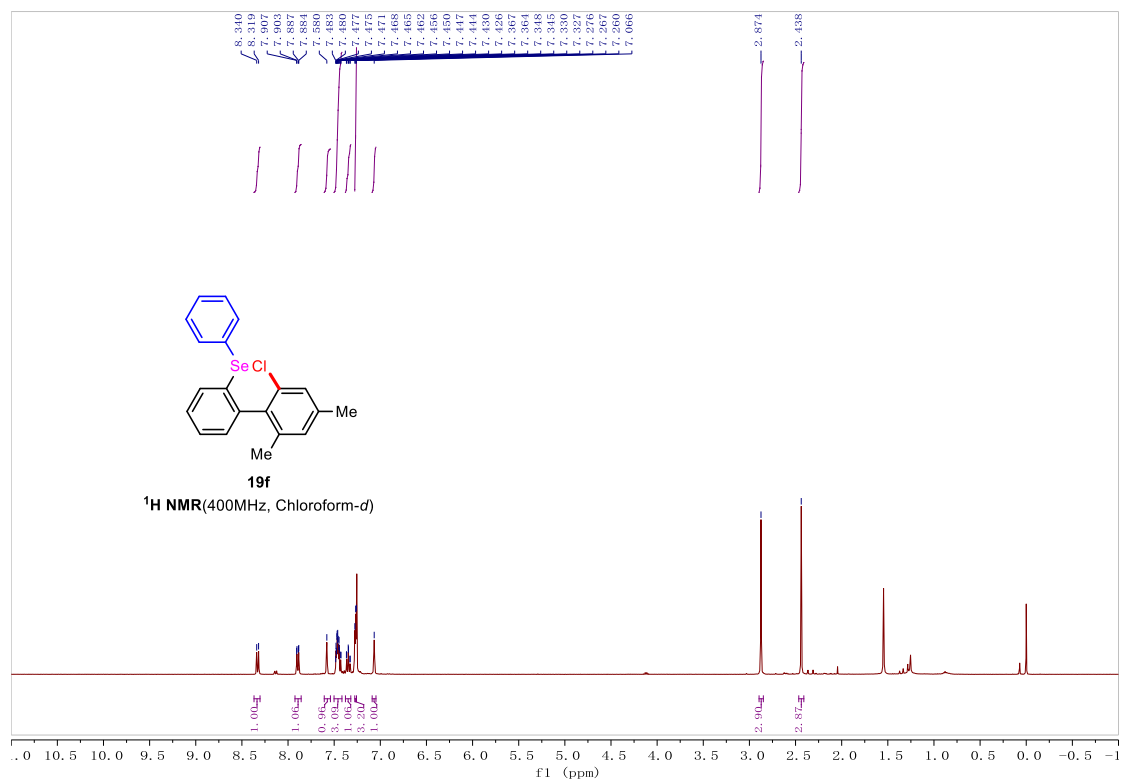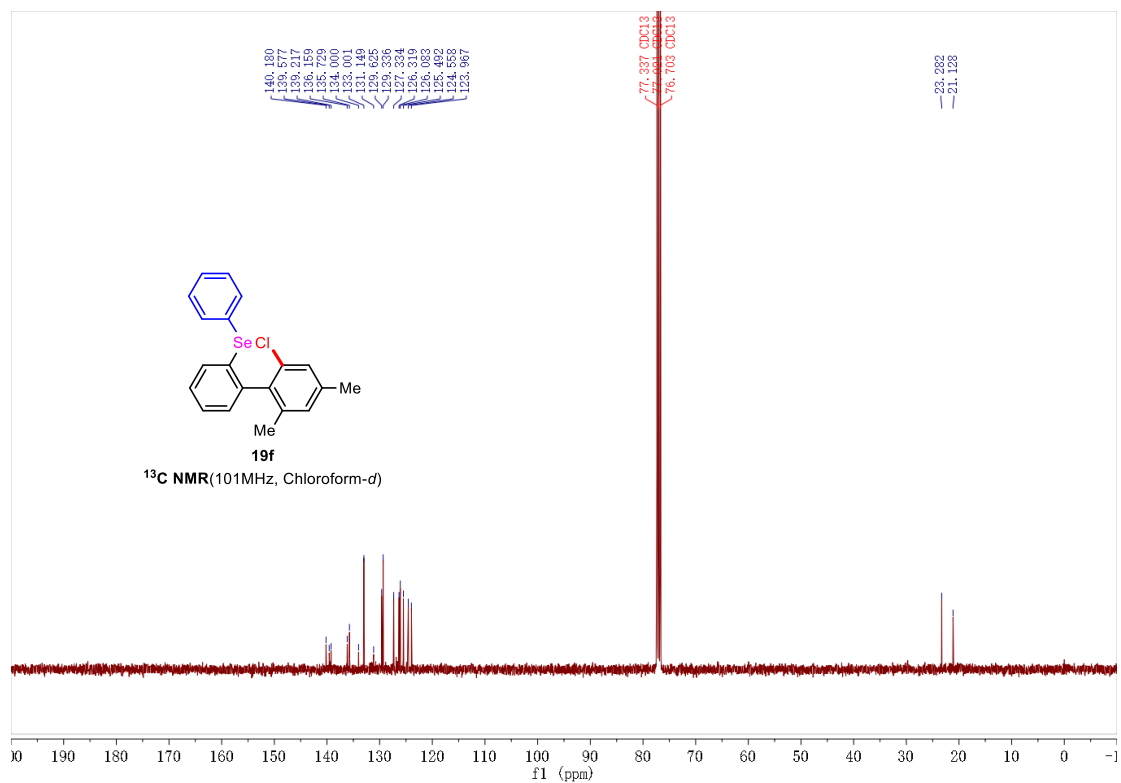

Supplement: d3cc01119d1.pdf [file d3cc01119d1.pdf]
